# Supplementary material for: Genome-scale analysis of DNA methylation in lung adenocarcinoma and integration with mRNA expression
Source: HighWire-hosted journal article supplement (doi:10.1101/gr.132662.111), 2012-05-21
Supplement: Selamat_Suppl_Table1.xlsx [file Selamat_Suppl_Table1.xlsx]

## Sheet: Hypermethylated
Supplemental Table 1. Sheet 1: Genes significantly hypermethylated in tumor vs. NTL
Infinium Probe Name	Gene Name	Wilcoxon Rank p-value	Q-value	β-value difference
cg25720804	TLX3	7.549e-23	1.39061e-22	0.607959
cg08089301	HOXB4	6.93195e-20	6.51869e-20	0.596387
cg14458834	HOXB4	3.4403e-25	1.18624e-24	0.592791
cg12374721	PRAC	6.12562e-32	4.11871e-30	0.584251
cg22881914	NID2	4.24861e-20	4.09067e-20	0.574958
cg26521404	HOXA9	1.20509e-30	2.85978e-29	0.557031
cg00949442	ABCA3	1.31979e-18	9.89655e-19	0.528095
cg16731240	ZNF577	9.95776e-17	5.40772e-17	0.52499
cg06760035	HOXB4	2.44736e-17	1.46054e-17	0.517784
cg07307078	TUBB6	2.01085e-20	2.09078e-20	0.512341
cg22660578	LHX1	4.66567e-21	5.65239e-21	0.511418
cg23290344	NEFM	7.549e-23	1.39061e-22	0.507628
cg17525406	AJAP1	3.9363e-19	3.27422e-19	0.502001
cg21546671	HOXB4	1.76392e-26	1.03131e-25	0.494289
cg18952647	BNC1	8.94691e-25	2.67363e-24	0.492778
cg23432345	HOXA7	1.36966e-22	2.39201e-22	0.489338
cg25875213	ZNF781	4.27262e-21	5.23915e-21	0.485028
cg04534765	GALR1	5.57927e-23	1.06674e-22	0.47835
cg10303487	DPYS	8.83101e-20	8.13388e-20	0.473343
cg19456540	SIX6	4.40636e-24	1.10412e-23	0.473172
cg01683883	CMTM2	3.15553e-24	8.43058e-24	0.470891
cg22471346	GAS7	1.11055e-20	1.24106e-20	0.465885
cg24199834	POU4F2	4.66567e-21	5.65239e-21	0.462506
cg01354473	HOXA9	3.53591e-29	4.91887e-28	0.458145
cg01295203	PRDM14	6.22718e-19	5.02439e-19	0.456365
cg17241310	BARHL2	1.12285e-25	4.62227e-25	0.452431
cg04330449	NEUROG1	2.80496e-17	1.65196e-17	0.45136
cg26609631	GSX1	6.7835e-16	3.20448e-16	0.451098
cg15520279	HOXD8	8.06038e-18	5.18621e-18	0.446953
cg26128092	WDR8	1.10789e-21	1.5412e-21	0.446362
cg27188703	FAIM2	2.02449e-22	3.34724e-22	0.443932
cg25764191	INA	2.64102e-10	6.22343e-11	0.442562
cg00117172	RUNX3	2.06223e-13	7.02664e-14	0.442364
cg14859460	GRM6	1.53656e-26	9.39222e-26	0.442113
cg03958979	NR2E1	2.01085e-20	2.09078e-20	0.43739
cg09649610	GNG4	1.14483e-17	7.18276e-18	0.437327
cg06263495	ASCL2	5.88349e-17	3.29201e-17	0.43493
cg14991487	HOXD9	7.51608e-20	7.0189e-20	0.432851
cg01335367	C12orf34	8.86212e-30	1.48966e-28	0.430667
cg13878010	ADCY5	4.09042e-11	1.06463e-11	0.429465
cg05436658	PRKCB	5.26466e-22	7.77982e-22	0.428696
cg25942450	TLX3	3.52861e-24	9.18403e-24	0.428591
cg21226224	SOX17	2.69392e-25	9.45037e-25	0.428235
cg26069745	HOXA2	1.36966e-22	2.39201e-22	0.427352
cg12111714	ATP8A2	1.01051e-26	6.47084e-26	0.425781
cg01009664	TRH	5.04091e-23	9.73026e-23	0.425153
cg09516965	PTGDR	1.62035e-17	9.94961e-18	0.423695
cg10660256	BHMT	4.3589e-22	6.66093e-22	0.421282
cg27626299	EVX1	3.96916e-26	1.97686e-25	0.41909
cg05521696	SLC2A14	3.12029e-33	4.196e-31	0.41755
cg15540820	EOMES	3.28452e-34	6.62527e-32	0.417191
cg03975694	ZNF540	1.79173e-23	3.86538e-23	0.414761
cg10883303	HOXA13	9.17985e-13	2.86196e-13	0.414647
cg08572611	ACTL6B	2.04023e-15	8.95624e-16	0.411486
cg23244913	HCG9	1.33502e-15	6.02438e-16	0.409924
cg06722633	GRIK3	3.27649e-21	4.0923e-21	0.408511
cg00767581	HOXD4	9.46434e-31	2.72724e-29	0.408392
cg19352038	PAX3	1.1233e-31	6.47383e-30	0.408138
cg02245378	CCDC140	1.9267e-30	4.3182e-29	0.407617
cg17965019	HIST1H3J	2.24318e-06	3.41879e-07	0.407512
cg13912117	ADCY8	1.22754e-17	7.67779e-18	0.406999
cg26316946	GRIK2	4.94357e-25	1.59549e-24	0.406514
cg12127282	HOXD4	2.0213e-27	1.66417e-26	0.40612
cg18236477	ATP8A2	3.21312e-17	1.87049e-17	0.405706
cg02164046	SST	1.79231e-24	5.05636e-24	0.405247
cg08118311	SALL3	1.11055e-20	1.24106e-20	0.404113
cg04048259	EDN3	4.24756e-18	2.89454e-18	0.403453
cg03734874	TMEM179	7.81456e-19	6.16943e-19	0.403024
cg24715245	UCHL1	5.27787e-15	2.19734e-15	0.401428
cg12680609	ZFP41	1.4342e-20	1.55954e-20	0.401123
cg20959866	AJAP1	2.38174e-25	8.57902e-25	0.401085
cg14056644	PITX2	1.53075e-18	1.13518e-18	0.400351
cg23207990	SFRP2	1.59679e-21	2.14728e-21	0.397275
cg22341310	ZNF541	1.26609e-28	1.5478e-27	0.395855
cg07536847	PAX7	1.21438e-21	1.67778e-21	0.39322
cg24989962	PTGDR	8.64879e-18	5.5383e-18	0.392691
cg06958829	CHAD	3.91299e-20	3.79469e-20	0.39189
cg01805282	EYA4	6.85823e-09	1.37445e-09	0.391184
cg20723355	FBXO39	1.19364e-11	3.28924e-12	0.389571
cg09643544	ZNF177	2.11476e-19	1.81907e-19	0.389149
cg22815110	FOXD3	2.8107e-16	1.40858e-16	0.3886
cg19988449	BNC1	4.24756e-18	2.89454e-18	0.388538
cg07703401	HBQ1	4.81469e-17	2.73572e-17	0.388168
cg19831575	FGF4	7.07465e-14	2.51461e-14	0.387375
cg02909790	HIST1H3G	6.77683e-13	2.15101e-13	0.386908
cg13398291	SFRP1	1.42588e-19	1.26148e-19	0.386266
cg26416466	MEGF11	1.08837e-29	1.7563e-28	0.385068
cg25574024	IGF2AS	2.47377e-16	1.25374e-16	0.384923
cg09873258	DLK1	9.76579e-19	7.53879e-19	0.384141
cg20291049	POU3F3	4.69325e-15	1.97226e-15	0.384083
cg21296230	GREM1	3.12232e-19	2.64626e-19	0.383531
cg13870866	TBX20	2.69392e-25	9.45037e-25	0.383388
cg23130254	HOXD12	7.95444e-25	2.43107e-24	0.382828
cg20616414	WNK2	3.93253e-15	1.66822e-15	0.380226
cg12880658	CDO1	3.42739e-31	1.25699e-29	0.379865
cg17063929	NOX4	2.52237e-28	2.82662e-27	0.379616
cg18722841	PHOX2A	7.95444e-25	2.43107e-24	0.377381
cg02919422	SOX17	3.68049e-27	2.65143e-26	0.375175
cg02599464	HIST1H4I	4.40636e-24	1.10412e-23	0.373617
cg25047280	HOXA9	2.92273e-29	4.36703e-28	0.372911
cg09082287	DNAJC6	3.96454e-22	6.19919e-22	0.372646
cg27652350	ALDH1A3	1.36999e-12	4.15868e-13	0.372493
cg15539420	HOXB8	1.62035e-17	9.94961e-18	0.372316
cg25044651	LVRN	4.3589e-22	6.66093e-22	0.372092
cg07778029	HOXA9	4.53141e-26	2.12568e-25	0.370927
cg07109287	LHX2	5.38101e-07	8.74276e-08	0.36976
cg03963198	IRX4	1.96462e-10	4.70092e-11	0.369428
cg18555440	MYOD1	1.84853e-20	1.94711e-20	0.368846
cg10784030	INPP5B	6.3744e-16	3.02184e-16	0.368595
cg25596297	CCDC140	3.03161e-30	6.11512e-29	0.367937
cg25802093	SPAG6	6.34492e-14	2.27731e-14	0.367536
cg05345286	MDFI	5.83813e-11	1.4869e-11	0.36625
cg17619823	ADRB3	4.37861e-16	2.13596e-16	0.366248
cg14419187	UNC80	1.9098e-18	1.39829e-18	0.365733
cg21790626	ZNF154	9.24298e-16	4.2811e-16	0.364067
cg08097882	POU4F1	3.78065e-06	5.651e-07	0.363736
cg01580681	HAND2	4.94357e-25	1.59549e-24	0.363605
cg23587449	LRAT	4.94357e-25	1.59549e-24	0.363168
cg02008154	TBX20	8.14784e-20	7.5564e-20	0.362219
cg23710218	MSC	1.69895e-20	1.80368e-20	0.361851
cg20881910	NTM	1.67122e-14	6.48903e-15	0.358795
cg12768605	LYPD5	5.2656e-18	3.52283e-18	0.358522
cg18536148	TBX4	2.00888e-24	5.58917e-24	0.357474
cg02806777	PGLYRP1	2.31878e-26	1.28144e-25	0.355917
cg04490714	SLC6A2	5.78339e-22	8.51517e-22	0.355703
cg04623837	HCG9	3.95283e-18	2.72593e-18	0.35521
cg21907579	TBX5	2.5201e-24	6.86938e-24	0.355209
cg27549944	PLEKHA6	4.66567e-21	5.65239e-21	0.355079
cg04622802	FIBIN	1.50135e-13	5.16353e-14	0.353272
cg16787600	SORCS3	2.37936e-18	1.70496e-18	0.352951
cg00015770	QRFPR	5.27787e-15	2.19734e-15	0.352578
cg14958635	NEUROG1	1.70221e-15	7.53802e-16	0.352509
cg00489401	FLT4	5.59612e-15	2.3155e-15	0.351945
cg08668790	ZNF154	1.67122e-14	6.48903e-15	0.351331
cg11525285	VSX2	7.06835e-25	2.19349e-24	0.349585
cg09099744	CDKN2A	3.95283e-18	2.72593e-18	0.349179
cg04797323	SOCS2	2.64986e-08	4.97681e-09	0.3486
cg10235817	ADRA2C	9.35423e-21	1.07821e-20	0.347619
cg06277657	DGKI	1.43981e-12	4.36405e-13	0.346959
cg10300684	FOXG1	4.11072e-23	8.12923e-23	0.344852
cg06995715	FOXL1	8.32417e-14	2.9329e-14	0.344751
cg02351381	C12orf34	3.17343e-27	2.37081e-26	0.343772
cg20052718	TWIST1	1.19364e-11	3.28924e-12	0.343544
cg09313705	HOXB2	9.79199e-19	7.53879e-19	0.343239
cg27120999	HSPA2	3.94401e-24	1.00703e-23	0.343182
cg26186727	NETO1	2.58512e-20	2.64026e-20	0.339763
cg20792062	KCNA5	1.01046e-21	1.42036e-21	0.339556
cg05890484	BHMT	7.12982e-13	2.25595e-13	0.33934
cg20073553	NKX3-2	3.68049e-27	2.65143e-26	0.339339
cg15748507	PRLHR	3.52861e-24	9.18403e-24	0.339249
cg25691167	FERD3L	2.80974e-20	2.8409e-20	0.339014
cg03567830	NTSR1	5.38548e-14	1.95381e-14	0.338279
cg14882700	OTOP1	1.41072e-17	8.74224e-18	0.337994
cg15279364	TMEM130	3.60314e-20	3.52814e-20	0.337368
cg10238818	CYYR1	1.01935e-20	1.14868e-20	0.33649
cg21460081	HOXB4	1.56114e-20	1.67947e-20	0.33617
cg18702197	HOXD3	2.82062e-24	7.63696e-24	0.33547
cg21233722	DOCK2	5.2656e-18	3.52283e-18	0.334756
cg09229912	CUX2	1.03276e-13	3.61353e-14	0.334402
cg22709192	HOXC11	1.43699e-11	3.91435e-12	0.334319
cg11438428	PTF1A	1.19364e-11	3.28924e-12	0.33396
cg25484904	CWH43	2.37936e-18	1.70496e-18	0.333571
cg16638540	ZNF135	4.64288e-12	1.33694e-12	0.332545
cg00891541	SMPD3	7.65399e-22	1.09886e-21	0.331694
cg22187630	CACNA1A	2.21004e-23	4.64366e-23	0.331522
cg07621046	C10orf82	1.06754e-17	6.76095e-18	0.331411
cg07644368	CDO1	4.53141e-26	2.12568e-25	0.330678
cg09949775	COMP	4.27739e-11	1.10971e-11	0.330612
cg06563300	SLC17A8	3.70667e-15	1.57738e-15	0.330584
cg19885761	CPLX2	3.70667e-15	1.57738e-15	0.330562
cg26850754	CD8B	1.30985e-11	3.59229e-12	0.329593
cg25145670	HOXB4	3.12232e-19	2.64626e-19	0.328999
cg21604042	SCUBE3	1.47738e-16	7.76056e-17	0.327995
cg14384532	NTRK3	6.99794e-18	4.5608e-18	0.327708
cg07104706	SLITRK1	1.31707e-19	1.17813e-19	0.327292
cg24446548	TWIST1	1.65036e-11	4.46542e-12	0.327288
cg06908778	SPAG6	1.7686e-14	6.83425e-15	0.326935
cg21243096	POU3F1	1.51201e-17	9.34123e-18	0.326763
cg27409364	KCNC1	1.27453e-27	1.11778e-26	0.32549
cg15607672	OTX2	3.42739e-31	1.25699e-29	0.325142
cg14008883	SLC18A3	8.06038e-18	5.18621e-18	0.324536
cg19064258	HS3ST2	6.99794e-18	4.5608e-18	0.324092
cg08260959	HIST1H4F	3.05324e-20	3.04889e-20	0.323946
cg19797376	TAL1	4.93547e-27	3.37472e-26	0.323555
cg21591742	HOXD10	1.10789e-21	1.5412e-21	0.323507
cg18397523	EVX1	1.56114e-20	1.67947e-20	0.322409
cg00333226	VWC2	2.1762e-16	1.1099e-16	0.322183
cg21269897	HIST1H4I	4.27262e-21	5.23915e-21	0.32215
cg10486998	GALR1	9.21934e-23	1.64571e-22	0.32039
cg02613386	FBXO39	2.53218e-10	5.98793e-11	0.320046
cg08578734	GRIA1	3.95283e-18	2.72593e-18	0.319363
cg17861230	PDE4C	2.85596e-09	5.96666e-10	0.318823
cg21376883	ACTN2	6.3744e-16	3.02184e-16	0.318583
cg19343464	GRIA4	1.45791e-21	1.98032e-21	0.318579
cg02422694	HOXB4	2.62227e-14	9.87756e-15	0.318408
cg14144305	ALX4	1.21633e-19	1.09531e-19	0.317829
cg11935147	PDE4DIP	1.51093e-22	2.60489e-22	0.317178
cg02309273	INPP5B	1.11137e-15	5.08916e-16	0.317126
cg15343119	GALR1	3.05324e-20	3.04889e-20	0.316615
cg10088985	CXCL5	7.18136e-17	3.95243e-17	0.315905
cg27009703	HOXA9	7.41481e-29	9.6494e-28	0.314898
cg21269934	NAT8L	7.18136e-17	3.95243e-17	0.314704
cg26113512	VILL	8.42619e-19	6.60064e-19	0.314434
cg09088576	CSF3R	1.45713e-10	3.55192e-11	0.314312
cg09619146	CPXM2	3.37357e-19	2.84129e-19	0.314171
cg26252167	GPR6	1.74845e-21	2.32795e-21	0.314103
cg24194775	NPR2	6.06675e-21	7.13549e-21	0.313725
cg24516901	FAM124B	5.28575e-16	2.53857e-16	0.313659
cg01152019	HOXD4	1.44636e-25	5.66501e-25	0.313404
cg04528819	KLF14	4.52665e-09	9.24638e-10	0.313246
cg04623955	DIO3	8.06038e-18	5.18621e-18	0.312934
cg18794577	GRIN3A	2.50707e-21	3.20067e-21	0.312599
cg22680204	CRMP1	5.25119e-13	1.70021e-13	0.31167
cg22134325	NPAS4	1.06754e-17	6.76095e-18	0.3113
cg02844545	GCM2	7.19638e-30	1.26226e-28	0.311112
cg12910797	HOXB3	8.72873e-13	2.73399e-13	0.311106
cg11004890	SLC4A11	1.76392e-26	1.03131e-25	0.310935
cg25226247	TFAP2B	9.88361e-26	4.1106e-25	0.310435
cg16254309	CNTNAP2	1.12309e-19	1.01816e-19	0.310351
cg05221167	ZNF560	4.55292e-23	8.91629e-23	0.310138
cg17568996	NFAM1	1.01833e-22	1.80184e-22	0.309824
cg25509184	CFTR	3.66223e-14	1.35049e-14	0.309803
cg15868302	FOXD2	2.96028e-18	2.0915e-18	0.309246
cg13462129	DLX5	1.01935e-20	1.14868e-20	0.309068
cg02994974	SPON1	8.19689e-17	4.48687e-17	0.308898
cg12448933	RAB37	5.38548e-14	1.95381e-14	0.308614
cg00234616	TLX2	2.80496e-17	1.65196e-17	0.308254
cg03755123	UTF1	5.50387e-17	3.08817e-17	0.308241
cg12422450	CHGA	8.35335e-08	1.48129e-08	0.308103
cg03544320	CRMP1	8.64879e-18	5.5383e-18	0.307997
cg13234863	TMEM132D	5.77132e-19	4.68469e-19	0.307965
cg08832227	KCNA1	4.58972e-19	3.76342e-19	0.307663
cg20366906	PCDH8	1.0532e-23	2.42792e-23	0.307583
cg14399060	HOXD4	2.38174e-25	8.57902e-25	0.307529
cg09936561	DRD5	3.9363e-19	3.27422e-19	0.307392
cg10556064	SMPD3	3.31716e-20	3.26395e-20	0.306932
cg06638433	IGF2BP1	3.9225e-07	6.46153e-08	0.306883
cg05373457	KCNS2	2.47274e-19	2.10902e-19	0.306794
cg03483626	KCNA3	1.59679e-21	2.14728e-21	0.306098
cg18750960	HOXD4	4.47262e-11	1.1559e-11	0.30604
cg11500797	DLX5	4.27262e-21	5.23915e-21	0.305461
cg24110050	TCTEX1D1	1.45037e-23	3.19734e-23	0.305186
cg08876932	PHOX2A	1.06754e-17	6.76095e-18	0.304364
cg02161900	MKX	2.09474e-21	2.71726e-21	0.304308
cg07017374	FLT3	7.12568e-12	2.01448e-12	0.303309
cg00548268	NPTX2	9.95337e-18	6.34349e-18	0.302055
cg12614105	NPY	5.09367e-21	6.09765e-21	0.301841
cg13929328	FOXI2	2.8107e-16	1.40858e-16	0.301647
cg19466563	SPARCL1	7.95028e-28	7.45891e-27	0.301542
cg02774439	HAND2	1.3312e-14	5.27025e-15	0.301407
cg15992730	GDF3	9.35423e-21	1.07821e-20	0.301395
cg17586860	SSTR4	2.35721e-12	6.97694e-13	0.301005
cg07260592	LPA	1.73622e-17	1.05487e-17	0.300208
cg12782180	LEP	1.85833e-25	6.87795e-25	0.298996
cg10398682	BNC1	8.78641e-14	3.08767e-14	0.298265
cg02757432	GPR26	2.62024e-17	1.5591e-17	0.297722
cg15842276	MTNR1B	1.79173e-23	3.86538e-23	0.297466
cg00662556	GALR1	7.24613e-19	5.80012e-19	0.297245
cg00005847	HOXD3	3.4403e-25	1.18624e-24	0.297215
cg20537629	MAGI2	1.01935e-20	1.14868e-20	0.296618
cg04907257	ADCY2	1.44787e-12	4.38517e-13	0.296056
cg02250594	ONECUT2	1.58325e-13	5.44054e-14	0.295929
cg06151165	VSX1	1.21633e-19	1.09531e-19	0.295638
cg08109815	NMBR	7.64243e-26	3.35124e-25	0.294987
cg13262687	POU4F2	6.97333e-22	1.0156e-21	0.294503
cg27398547	C14orf39	1.58995e-12	4.79032e-13	0.293875
cg21301440	CYGB	6.8353e-24	1.59394e-23	0.293551
cg06363129	SOSTDC1	7.51608e-20	7.0189e-20	0.293429
cg21096399	MCAM	2.96028e-18	2.0915e-18	0.293198
cg26312150	TWIST1	9.87922e-11	2.45262e-11	0.292974
cg08575537	EPO	6.10186e-11	1.54723e-11	0.292804
cg22774472	COL5A2	5.55961e-21	6.59671e-21	0.292706
cg07730329	PCDHGA12	3.01906e-23	6.08981e-23	0.292615
cg08441806	NKX6-2	6.07205e-18	4.00263e-18	0.292603
cg00995520	KCNA3	1.33076e-21	1.82606e-21	0.29253
cg03874199	HOXD12	1.85833e-25	6.87795e-25	0.291473
cg10141715	SLC5A8	5.38548e-14	1.95381e-14	0.291276
cg16009558	GRIK2	3.17343e-27	2.37081e-26	0.291252
cg04897683	NEUROG1	4.2759e-13	1.40016e-13	0.289795
cg11323198	CDH8	4.25084e-19	3.51412e-19	0.289291
cg08369065	GATA4	1.67029e-19	1.45852e-19	0.28799
cg10957151	HOXD9	5.50387e-17	3.08817e-17	0.287763
cg05508084	ZNF667	3.60314e-20	3.52814e-20	0.287667
cg03561565	KCNS2	4.79111e-22	7.18531e-22	0.287528
cg04784672	LRFN5	1.21633e-19	1.09531e-19	0.287403
cg02624705	DCC	9.82973e-16	4.52172e-16	0.287357
cg13791131	IGF2AS	5.93297e-15	2.44485e-15	0.28716
cg16042149	NEFH	1.61235e-23	3.51601e-23	0.287039
cg02681442	FOXG1	1.20965e-20	1.33699e-20	0.28683
cg06230736	GATA3	6.60939e-05	8.55708e-06	0.286371
cg15107670	WT1	2.55948e-18	1.8243e-18	0.286172
cg17020834	GRIA1	1.84853e-20	1.94711e-20	0.285748
cg24250393	PRKCB	1.01935e-20	1.14868e-20	0.285689
cg02510853	PKMYT1	1.79402e-16	9.3147e-17	0.28501
cg21461100	NOVA2	3.47733e-13	1.15175e-13	0.284698
cg20498685	TWIST1	2.80496e-17	1.65196e-17	0.28418
cg19576304	RAX	3.18291e-18	2.22928e-18	0.284137
cg25563456	WT1	1.5434e-19	1.35358e-19	0.284106
cg14166009	HKR1	1.22518e-18	9.23866e-19	0.283443
cg18674980	CA3	2.00888e-24	5.58917e-24	0.283431
cg12109455	DPYSL4	1.13718e-18	8.67229e-19	0.283267
cg20973210	C19orf35	1.27958e-13	4.43863e-14	0.283094
cg11376198	AKR7L	1.93708e-12	5.79293e-13	0.283054
cg20442697	LRRC17	4.50231e-17	2.56183e-17	0.282834
cg13663218	TRHDE	6.66677e-15	2.72772e-15	0.282802
cg00806490	CDH13	2.28557e-17	1.37211e-17	0.28214
cg11946503	NEUROG1	4.94357e-25	1.59549e-24	0.282034
cg04599297	GAD2	3.03844e-26	1.63437e-25	0.281904
cg21410991	ISL1	1.13845e-16	6.10743e-17	0.281091
cg20831708	SEC31B	1.18742e-14	4.73353e-15	0.280977
cg14696396	TM6SF1	3.31408e-12	9.70231e-13	0.280796
cg25902889	FSD1	7.81456e-19	6.16943e-19	0.280687
cg12024906	HKR1	1.85158e-08	3.54015e-09	0.279949
cg18752880	C1QTNF3	2.47532e-12	7.30508e-13	0.279874
cg21331821	ZSCAN1	3.19205e-16	1.58981e-16	0.279147
cg04219321	HLF	2.49105e-11	6.59848e-12	0.279135
cg09009380	PKP1	3.18291e-18	2.22928e-18	0.27884
cg04981492	SYDE1	6.8353e-24	1.59394e-23	0.278807
cg15227982	C10orf26	2.59379e-15	1.12154e-15	0.278192
cg22418909	SFRP1	8.06038e-18	5.18621e-18	0.27818
cg06165395	GRIK3	6.17299e-23	1.16371e-22	0.278055
cg12699371	GALR1	2.74171e-21	3.47821e-21	0.277669
cg14159672	PM20D1	0.000129127	1.61729e-05	0.277139
cg11812218	GHSR	1.73622e-17	1.05487e-17	0.276598
cg18438777	NPY5R	1.91354e-16	9.88434e-17	0.275983
cg26721264	GALR1	2.99756e-21	3.77903e-21	0.275553
cg06092815	SPHKAP	8.14784e-20	7.5564e-20	0.274943
cg19884262	FOXI2	6.00801e-14	2.17379e-14	0.274868
cg05414338	HIST1H3F	2.54404e-13	8.61737e-14	0.274625
cg22231902	EN1	1.01509e-12	3.14284e-13	0.274463
cg20050826	KRT72	1.84853e-20	1.94711e-20	0.274262
cg12799895	NPTX2	7.21806e-16	3.40578e-16	0.27406
cg15852891	OTP	1.47738e-16	7.76056e-17	0.27394
cg19358493	EMX2	6.59232e-27	4.4325e-26	0.27356
cg25465406	GUCY2D	1.26917e-24	3.65725e-24	0.273134
cg11354906	SFRP2	6.51905e-18	4.26246e-18	0.272793
cg17963840	ADRA1A	4.3589e-22	6.66093e-22	0.272668
cg11368643	PCDHB15	3.30151e-13	1.09803e-13	0.27228
cg05158615	NPY	5.90092e-09	1.19207e-09	0.272033
cg13547644	ACTA1	1.80834e-15	7.973e-16	0.271995
cg22472290	ZNF577	2.77302e-14	1.04162e-14	0.271771
cg20588069	MSX1	2.37797e-20	2.43484e-20	0.271524
cg09829319	GCM2	1.27479e-25	5.09189e-25	0.270423
cg02332525	GRM7	4.24756e-18	2.89454e-18	0.270034
cg20798152	CARTPT	4.90192e-28	5.07065e-27	0.269994
cg03064067	SLC6A15	2.1342e-17	1.29084e-17	0.269403
cg21245652	MAL	3.28452e-34	6.62527e-32	0.269081
cg04549333	ALX4	9.65354e-13	3.00036e-13	0.26876
cg03289872	ZNF667	1.38445e-16	7.32966e-17	0.268116
cg11647681	PCDHGA12	8.58216e-21	9.97766e-21	0.267777
cg19317715	AOC2	4.11072e-23	8.12923e-23	0.267716
cg26304237	DNAJC6	2.50707e-21	3.20067e-21	0.267293
cg24101578	CDH22	1.38445e-16	7.32966e-17	0.266592
cg11965370	NTM	5.52687e-13	1.77947e-13	0.266519
cg21529533	HLA-G	1.74845e-21	2.32795e-21	0.265803
cg27223047	FBN2	1.03784e-11	2.87956e-12	0.265533
cg06675478	SOX1	4.20965e-17	2.4089e-17	0.265405
cg09179845	C7	2.11476e-19	1.81907e-19	0.265162
cg26200585	PRX	6.28949e-15	2.58647e-15	0.26442
cg05159188	HIST1H4F	1.4342e-20	1.55954e-20	0.264247
cg07168556	WFIKKN2	4.93009e-10	1.12241e-10	0.264211
cg19718882	WIT1	1.53075e-18	1.13518e-18	0.264154
cg17029168	NKX2-2	1.70221e-15	7.53802e-16	0.263765
cg25993718	CBLN4	9.95337e-18	6.34349e-18	0.263686
cg15489294	LVRN	1.98016e-14	7.58636e-15	0.263289
cg18403361	CLEC14A	5.62686e-16	2.68958e-16	0.263106
cg12073779	CRYGD	3.31716e-20	3.26395e-20	0.262967
cg10114327	QRFPR	1.45791e-21	1.98032e-21	0.262767
cg00902195	SYT10	3.43829e-17	1.99294e-17	0.262675
cg16853982	ACTN2	4.2759e-13	1.40016e-13	0.262495
cg16028753	PODN	1.31707e-19	1.17813e-19	0.262344
cg19594666	LEP	1.5434e-19	1.35358e-19	0.262255
cg21272774	HOXC9	3.13434e-13	1.04501e-13	0.261735
cg23054883	FZD10	1.47738e-16	7.76056e-17	0.261721
cg20855565	TRIM58	1.22754e-17	7.67779e-18	0.261584
cg03001305	STAT5A	5.25119e-13	1.70021e-13	0.261338
cg23303408	POU4F3	7.24613e-19	5.80012e-19	0.261002
cg03943081	TCERG1L	4.2759e-13	1.40016e-13	0.260791
cg14456683	ZIC1	1.9903e-23	4.20385e-23	0.260524
cg27169020	BNC1	2.32036e-16	1.17747e-16	0.259927
cg16404106	CCDC81	4.24756e-18	2.89454e-18	0.259186
cg16652259	DLX1	0.000135125	1.69032e-05	0.258756
cg07084163	UGT3A2	2.45675e-22	3.94865e-22	0.258532
cg14262937	OPRM1	7.24613e-19	5.80012e-19	0.258427
cg10647513	HBA1	4.42503e-15	1.86733e-15	0.258296
cg22334665	SLC22A16	3.124e-11	8.20505e-12	0.258177
cg10722799	CLIC6	0.145228	0.0131748	0.258106
cg18546622	ALX4	2.1762e-16	1.1099e-16	0.257475
cg15988232	CSPG5	1.59831e-24	4.57303e-24	0.256585
cg16158681	MT3	7.51094e-18	4.87153e-18	0.256568
cg02994956	NEFH	3.91299e-20	3.79469e-20	0.256449
cg26511321	HOXA7	2.55948e-18	1.8243e-18	0.255516
cg26465611	MEGF10	8.78641e-14	3.08767e-14	0.255487
cg17214107	FGF2	7.19638e-30	1.26226e-28	0.255252
cg06269753	MSC	6.35143e-22	9.28377e-22	0.254406
cg10266490	ACOT11	2.18695e-20	2.25644e-20	0.254385
cg09879869	MUDENG	9.21934e-23	1.64571e-22	0.25414
cg18081258	NDRG2	2.25055e-24	6.21866e-24	0.253973
cg02173484	GJA5	1.79231e-24	5.05636e-24	0.253816
cg23776012	KRT222	9.82973e-16	4.52172e-16	0.253428
cg24496666	GIPC2	6.05265e-10	1.36412e-10	0.253205
cg17349199	C10orf82	6.12868e-24	1.46299e-23	0.253172
cg24019564	RUNX3	3.13434e-13	1.04501e-13	0.253011
cg24642523	HSPA2	7.42009e-10	1.65658e-10	0.252901
cg21815667	HOXD8	7.549e-23	1.39061e-22	0.252581
cg12265829	ADCY4	2.59916e-12	7.65933e-13	0.252536
cg06821993	CSMD3	5.62686e-16	2.68958e-16	0.252457
cg24507762	KCNB1	2.80496e-17	1.65196e-17	0.251933
cg06498267	HCN1	2.04023e-15	8.95624e-16	0.251926
cg18074297	CLIC6	0.0648512	0.00610846	0.251783
cg11584690	ZNF574	5.65488e-18	3.75216e-18	0.25099
cg18267381	ZNF385D	4.17173e-15	1.76598e-15	0.250869
cg09243021	CASP2	1.41041e-09	3.04275e-10	0.250737
cg03355526	ZNF454	2.03474e-12	6.07147e-13	0.250565
cg17950095	HOXA11	1.66117e-08	3.1897e-09	0.250489
cg18349835	VIPR2	2.04077e-16	1.04878e-16	0.250373
cg06818777	CHAD	9.78679e-14	3.43026e-14	0.250359
cg00107187	TMEM179	2.24458e-12	6.6582e-13	0.250357
cg21475402	BCAN	7.04328e-08	1.25838e-08	0.250346
cg12792011	ZNF329	2.27431e-11	6.06821e-12	0.250168
cg21949305	ADORA2A	6.37709e-11	1.61296e-11	0.250063
cg23412850	SOCS2	6.69626e-07	1.07928e-07	0.250001
cg16902509	ITGA8	1.21531e-16	6.50247e-17	0.249956
cg20972214	SLC2A3	4.56359e-18	3.09422e-18	0.24986
cg25148589	GRIA2	3.27791e-08	6.10521e-09	0.249195
cg07696033	ALX4	1.9903e-23	4.20385e-23	0.24915
cg11657808	RYR2	1.66947e-13	5.71735e-14	0.248981
cg20008332	SOX11	3.10212e-15	1.32852e-15	0.248916
cg22234962	C1orf104	1.42588e-19	1.26148e-19	0.248807
cg19135761	WDR8	6.39198e-20	6.05324e-20	0.248791
cg23887396	SARM1	1.11151e-08	2.17781e-09	0.248648
cg27560864	SCN4B	4.11072e-23	8.12923e-23	0.248607
cg20890210	KCNB2	3.27753e-14	1.22203e-14	0.248552
cg13488201	ADAM12	3.08548e-09	6.41958e-10	0.248531
cg05840031	PAX6	5.59612e-15	2.3155e-15	0.247916
cg10217445	OLIG2	4.79111e-22	7.18531e-22	0.247903
cg01839464	DCC	1.79402e-16	9.3147e-17	0.24773
cg03630088	CPXM2	2.37936e-18	1.70496e-18	0.247688
cg21581873	PLEKHA6	8.06038e-18	5.18621e-18	0.24767
cg25511429	NRN1	7.07465e-14	2.51461e-14	0.247577
cg10140638	PTPRN	5.28575e-16	2.53857e-16	0.247304
cg05389335	TACR3	4.32269e-14	1.58103e-14	0.246846
cg13315147	CYP2E1	5.56541e-05	7.28258e-06	0.246659
cg03918304	HOXD10	9.79199e-19	7.53879e-19	0.246487
cg11670211	NOX4	1.11137e-15	5.08916e-16	0.246397
cg15439862	DSC3	1.15572e-09	2.5216e-10	0.246112
cg19831077	WDR86	1.04526e-15	4.7973e-16	0.246041
cg04062391	ZNF560	4.3589e-22	6.66093e-22	0.245502
cg04457979	KCNQ1DN	1.79402e-16	9.3147e-17	0.244759
cg07447922	EPHA10	6.28949e-15	2.58647e-15	0.244736
cg06493386	TRPA1	2.92277e-15	1.25705e-15	0.243975
cg21542793	ADRA2B	3.31716e-20	3.26395e-20	0.243974
cg08047907	C1orf114	6.34492e-14	2.27731e-14	0.243816
cg21663122	HIST1H2BH	1.72807e-11	4.67255e-12	0.243751
cg20792294	IGF2AS	1.08974e-13	3.80628e-14	0.243471
cg11260848	ALX4	3.93551e-17	2.26488e-17	0.243134
cg21238818	GAL3ST3	7.89009e-13	2.48482e-13	0.242721
cg14473924	PDZRN3	2.62227e-14	9.87756e-15	0.242285
cg18691434	GPC2	6.66432e-11	1.67824e-11	0.24211
cg03388193	HPSE2	5.26466e-22	7.77982e-22	0.241883
cg15518950	TMEM171	2.84512e-08	5.32123e-09	0.241832
cg15127733	HSPA12B	1.31604e-17	8.19322e-18	0.24144
cg22836229	EFCAB1	4.45363e-07	7.29773e-08	0.241034
cg21053529	GJD2	1.13845e-16	6.10743e-17	0.241
cg09306675	EYA2	1.45713e-10	3.55192e-11	0.240431
cg01305421	IGF1	3.37357e-19	2.84129e-19	0.240383
cg25363445	ALX4	6.06675e-21	7.13549e-21	0.240377
cg12758687	DRD2	1.12309e-19	1.01816e-19	0.240371
cg24505341	CADPS	9.35138e-17	5.09119e-17	0.240225
cg00027083	EPB41L3	1.93411e-09	4.10666e-10	0.23988
cg09053680	UTF1	3.53993e-10	8.25964e-11	0.239705
cg02932669	NALCN	1.51308e-12	4.57237e-13	0.239457
cg06339657	PDE8B	9.35423e-21	1.07821e-20	0.239046
cg19537511	ARHGEF15	1.1213e-14	4.47881e-15	0.239036
cg04598121	PENK	7.89009e-13	2.48482e-13	0.238789
cg10189695	GPR78	4.47262e-11	1.1559e-11	0.238747
cg03700462	HOXA1	2.17364e-13	7.38752e-14	0.23864
cg12827555	VSX2	1.9903e-23	4.20385e-23	0.238113
cg21696393	SOX8	1.30263e-09	2.82685e-10	0.238023
cg20080624	DLX5	5.65488e-18	3.75216e-18	0.237749
cg22752533	SLC12A5	1.79402e-16	9.3147e-17	0.237596
cg22740835	DDR2	4.38334e-25	1.47362e-24	0.237323
cg08995424	ATP5G2	3.46341e-09	7.15423e-10	0.23731
cg19697981	NR2E1	1.62035e-17	9.94961e-18	0.237056
cg09260089	NKX6-2	6.44081e-13	2.05081e-13	0.236646
cg01114088	CYTL1	6.44081e-13	2.05081e-13	0.236639
cg07694025	SFRP2	5.2656e-18	3.52283e-18	0.236557
cg15377518	ZEB2	1.7743e-18	1.3062e-18	0.236406
cg06710648	DAB1	1.08974e-13	3.80628e-14	0.236168
cg03382304	JAM2	1.87148e-14	7.19733e-15	0.236139
cg07376535	ADCYAP1	5.77132e-19	4.68469e-19	0.235938
cg06971096	PTPRN	2.99549e-16	1.49932e-16	0.235465
cg16014085	ZNF48	4.17954e-10	9.64051e-11	0.235395
cg24879335	TF	1.60214e-15	7.14191e-16	0.235198
cg16954341	SCGN	2.8107e-16	1.40858e-16	0.235001
cg13282837	TCL1A	2.55948e-18	1.8243e-18	0.234618
cg24784109	HIST1H3D	2.97769e-22	4.71087e-22	0.234343
cg08687901	HIST1H4E	1.84398e-12	5.52268e-13	0.234337
cg09626984	GATA4	3.31408e-12	9.70231e-13	0.234317
cg02724472	LRRC17	4.20965e-17	2.4089e-17	0.234269
cg20523861	KLHL1	3.27676e-22	5.14368e-22	0.234195
cg18533225	KLHDC7B	1.20509e-30	2.85978e-29	0.233954
cg09851465	C1orf87	1.38856e-05	1.95116e-06	0.233347
cg15760840	HOXA11	2.11476e-19	1.81907e-19	0.232659
cg12876594	NPR2	4.24861e-20	4.09067e-20	0.232636
cg17966192	SULT1C4	5.49278e-24	1.35117e-23	0.2323
cg22463915	EEF1A2	1.7686e-14	6.83425e-15	0.231612
cg11213150	ANGPTL2	5.91124e-07	9.5619e-08	0.231604
cg16422907	CCNA1	1.372e-11	3.7449e-12	0.231434
cg14893161	PM20D1	0.0027762	0.000303601	0.231389
cg01493517	IFFO1	1.30415e-23	2.93925e-23	0.231089
cg13302823	SCRT1	1.79402e-16	9.3147e-17	0.231066
cg22377389	GJB6	3.19205e-16	1.58981e-16	0.230608
cg25361106	TLX2	1.42588e-19	1.26148e-19	0.230569
cg13035743	PRRT1	5.93297e-15	2.44485e-15	0.230457
cg23300372	CARTPT	8.16979e-16	3.82354e-16	0.230231
cg25057743	PTH2R	1.03252e-08	2.03093e-09	0.230172
cg24176563	EYA4	9.2408e-09	1.82564e-09	0.229953
cg03538436	NOS1	1.79402e-16	9.3147e-17	0.229211
cg14614211	MKX	7.47041e-12	2.09871e-12	0.228986
cg03464655	SLC38A11	1.06731e-12	3.28936e-13	0.228964
cg06291867	HTR7	7.04328e-08	1.25838e-08	0.2287
cg07442479	GDNF	1.12212e-12	3.45039e-13	0.228682
cg12571423	CCNA1	1.1104e-09	2.43061e-10	0.228526
cg23642747	INA	2.28557e-17	1.37211e-17	0.228191
cg14652095	HIST1H1A	2.01085e-20	2.09078e-20	0.227975
cg15522957	ALX4	2.44736e-17	1.46054e-17	0.227641
cg19774122	LAMA2	1.25044e-11	3.43402e-12	0.22748
cg04317399	HOXA4	9.24298e-16	4.2811e-16	0.227003
cg17945001	IGSF21	7.81456e-19	6.16943e-19	0.226864
cg12164282	PXDN	4.48586e-06	6.63624e-07	0.226737
cg08535373	SLC32A1	2.59379e-15	1.12154e-15	0.226692
cg17602451	BCL2	7.58021e-07	1.21063e-07	0.226683
cg01830294	WNT2	1.34971e-13	4.65789e-14	0.226446
cg02248486	HOXA5	1.0775e-10	2.66353e-11	0.22602
cg02780849	GNG4	2.45675e-22	3.94865e-22	0.225676
cg01289103	KRT222	1.43699e-11	3.91435e-12	0.225518
cg11319389	TOX2	5.35891e-12	1.53545e-12	0.22527
cg07271264	MYOD1	1.08745e-11	3.01513e-12	0.225026
cg17706173	TMEM204	1.42147e-18	1.05804e-18	0.22498
cg01805540	CACNB2	7.48839e-15	3.04843e-15	0.224904
cg11738543	SOCS2	0.000229269	2.79772e-05	0.224642
cg15984661	CCDC8	1.69895e-20	1.80368e-20	0.224221
cg01870826	LOC389458	5.91124e-07	9.5619e-08	0.223942
cg27133864	HIST1H2AE	7.46944e-14	2.64793e-14	0.223716
cg01484156	NCALD	2.37936e-18	1.70496e-18	0.223144
cg14221171	TAC1	5.04091e-23	9.73026e-23	0.222801
cg23326689	STMN2	1.68178e-16	8.81129e-17	0.222672
cg07103493	SLC27A6	2.62227e-14	9.87756e-15	0.222132
cg00350296	CD248	6.66432e-11	1.67824e-11	0.222082
cg22462235	LEFTY2	1.45037e-23	3.19734e-23	0.221838
cg07028533	CNTNAP2	4.42551e-12	1.27525e-12	0.221684
cg03266453	EN1	3.96916e-26	1.97686e-25	0.221243
cg12061236	AKAP12	1.20965e-20	1.33699e-20	0.221084
cg24178740	FEV	3.678e-18	2.55827e-18	0.221073
cg21030598	PAK2	1.16302e-26	7.33112e-26	0.220896
cg11389172	SLC18A3	2.77302e-14	1.04162e-14	0.220859
cg22125370	SOCS2	1.58749e-10	3.83492e-11	0.220769
cg22678136	SNRPN	5.27787e-15	2.19734e-15	0.220741
cg19007731	RUNX1T1	1.80834e-15	7.973e-16	0.220475
cg20083676	S1PR3	6.85823e-09	1.37445e-09	0.219993
cg05472874	SULT4A1	3.30151e-13	1.09803e-13	0.21992
cg04660410	VILL	4.32269e-14	1.58103e-14	0.219576
cg04995717	TEK	3.52861e-24	9.18403e-24	0.219537
cg10298815	GPR88	3.47836e-12	1.01685e-12	0.219524
cg26701826	SGMS2	1.41886e-15	6.38128e-16	0.219067
cg02748539	SLC9A3	9.17985e-13	2.86196e-13	0.218698
cg23089840	LRRC3	1.41041e-09	3.04275e-10	0.218664
cg27553955	KCNG3	9.90425e-12	2.7537e-12	0.218119
cg12317456	MMP2	6.44081e-13	2.05081e-13	0.218115
cg20404387	FAM43B	2.62227e-14	9.87756e-15	0.21804
cg07123069	HOXC11	5.53584e-08	1.00193e-08	0.217897
cg22975913	WT1	1.59679e-21	2.14728e-21	0.217657
cg22359606	NEUROD1	1.241e-08	2.41859e-09	0.21735
cg16361890	LTC4S	6.12868e-24	1.46299e-23	0.217191
cg23640701	ACVRL1	9.79199e-19	7.53879e-19	0.217074
cg10257049	C5orf4	4.96477e-16	2.39869e-16	0.216616
cg15839448	SFRP1	6.72054e-17	3.72421e-17	0.216581
cg18873386	DLX5	5.34793e-19	4.35856e-19	0.216232
cg07903918	GABBR2	4.69325e-15	1.97226e-15	0.216053
cg11428724	PAX7	4.73109e-10	1.07954e-10	0.215835
cg00498604	TLL1	4.06101e-13	1.33304e-13	0.215814
cg13549845	GRID2	2.8107e-16	1.40858e-16	0.215664
cg17389519	PTF1A	5.2656e-18	3.52283e-18	0.215295
cg18110483	THBS4	5.55961e-21	6.59671e-21	0.215233
cg23097006	VSX1	1.64816e-18	1.21778e-18	0.21517
cg12128017	EPHA10	1.30346e-12	3.96567e-13	0.214778
cg22268231	SPIB	2.77302e-14	1.04162e-14	0.214773
cg20357628	PHACTR3	1.29721e-16	6.90401e-17	0.214703
cg07634191	SCARA5	4.88927e-11	1.25554e-11	0.21465
cg10175795	TCERG1L	2.49105e-11	6.59848e-12	0.214622
cg13354523	CLEC1A	6.51905e-18	4.26246e-18	0.21461
cg18267374	NEFM	3.4647e-14	1.28469e-14	0.214205
cg06015218	GRM1	5.26466e-22	7.77982e-22	0.214131
cg08185661	SYT9	5.1655e-08	9.37844e-09	0.213944
cg06432655	CLIP3	1.14976e-13	4.00553e-14	0.213832
cg04448487	GDAP1L1	1.88286e-10	4.51332e-11	0.213796
cg09191626	SPON1	4.5675e-14	1.66604e-14	0.213761
cg16517394	TNFSF4	8.408e-15	3.39199e-15	0.213456
cg25593948	TFAP2B	1.12444e-22	1.98091e-22	0.213373
cg21992250	SLC15A3	4.48586e-06	6.63624e-07	0.213025
cg11394785	LTC4S	1.22518e-18	9.23866e-19	0.21293
cg20339230	ST8SIA2	2.47949e-14	9.37473e-15	0.212858
cg08958015	CCDC65	1.49183e-14	5.84312e-15	0.21254
cg07752420	CDKN2A	1.25601e-15	5.70612e-16	0.211813
cg20023231	HS3ST2	1.42588e-19	1.26148e-19	0.211779
cg04765277	FLJ45983	4.96477e-16	2.39869e-16	0.211774
cg08812936	KCNMB2	5.81002e-10	1.31311e-10	0.211686
cg05647859	LIN7A	6.77683e-13	2.15101e-13	0.21154
cg20507276	OR2L13	5.47188e-09	1.10985e-09	0.211391
cg12081743	HDAC9	8.72435e-10	1.93598e-10	0.211201
cg05485060	CTNNAL1	4.81901e-08	8.76908e-09	0.211089
cg24628744	H2AFY	1.4342e-20	1.55954e-20	0.210992
cg18771300	RHOJ	3.4647e-14	1.28469e-14	0.210448
cg10362475	SHANK2	7.60803e-27	5.03157e-26	0.21038
cg21816539	GRIK1	1.34971e-13	4.65789e-14	0.210316
cg25033993	STX1B	1.34971e-13	4.65789e-14	0.210105
cg18087477	SYCP1	7.06835e-25	2.19349e-24	0.21004
cg09980522	GRIA4	1.29721e-16	6.90401e-17	0.209995
cg23563234	PCDHGB7	1.57905e-14	6.14892e-15	0.209949
cg27016494	DLX5	1.30415e-23	2.93925e-23	0.209759
cg23771603	MYO3A	2.07588e-11	5.55714e-12	0.209551
cg12864235	CDH9	1.60199e-08	3.08194e-09	0.209542
cg21870884	GPR25	9.84502e-10	2.17271e-10	0.209468
cg00777121	RASSF1	0.000129127	1.61729e-05	0.209267
cg05839235	NPR3	3.4647e-14	1.28469e-14	0.20906
cg16924616	DLX5	5.89452e-12	1.68175e-12	0.209006
cg13672342	CIAO1	7.51608e-20	7.0189e-20	0.208939
cg09945801	WRN	4.17173e-15	1.76598e-15	0.208833
cg11450827	CLDN5	4.3589e-22	6.66093e-22	0.20829
cg17186803	SCN4B	5.25119e-13	1.70021e-13	0.207963
cg10275770	ICAM2	4.01995e-12	1.16254e-12	0.207914
cg07295678	DPYSL4	1.25044e-11	3.43402e-12	0.207629
cg24719984	PPFIA2	3.70667e-15	1.57738e-15	0.207584
cg15309006	CHP2	3.08548e-09	6.41958e-10	0.207558
cg16092786	WT1	7.549e-23	1.39061e-22	0.207237
cg22994720	CHRDL2	1.26917e-24	3.65725e-24	0.207218
cg03365437	ALDH1A2	6.10186e-11	1.54723e-11	0.207191
cg13870494	MAMDC2	2.06223e-13	7.02664e-14	0.206683
cg26620157	PAX9	1.45713e-10	3.55192e-11	0.20663
cg17166338	TERT	2.02323e-26	1.14961e-25	0.206626
cg03775422	VSTM2A	1.21438e-21	1.67778e-21	0.206572
cg10362591	SLC6A2	9.45685e-10	2.09048e-10	0.206565
cg25014318	GLP1R	8.07392e-08	1.4349e-08	0.206514
cg17471928	STAC2	6.66677e-15	2.72772e-15	0.20593
cg26599006	GSC2	5.59612e-15	2.3155e-15	0.205674
cg14700707	NOTCH4	2.93218e-14	1.09834e-14	0.205595
cg15599064	HIST1H4H	1.06632e-16	5.75876e-17	0.205584
cg13348944	SCN2B	3.4647e-14	1.28469e-14	0.205525
cg06621358	CELSR3	9.99621e-15	4.00468e-15	0.205419
cg11612345	SMOC2	1.21531e-16	6.50247e-17	0.205388
cg20491707	PPYR1	3.49344e-15	1.49294e-15	0.205266
cg22123464	SLC8A2	3.66221e-13	1.21001e-13	0.205181
cg26780333	ACOT4	2.09474e-21	2.71726e-21	0.204997
cg18592174	CHAT	2.44736e-17	1.46054e-17	0.204833
cg12457773	NRSN1	6.34492e-14	2.27731e-14	0.204702
cg04123507	KRT86	2.96028e-18	2.0915e-18	0.204604
cg21271753	TMPRSS6	6.44081e-13	2.05081e-13	0.204263
cg20025656	ACTA1	4.27739e-11	1.10971e-11	0.204181
cg26050734	TNRC4	9.56962e-20	8.77412e-20	0.204176
cg06490988	GATA2	5.70443e-05	7.44999e-06	0.203863
cg25216696	GATA4	4.73927e-13	1.54313e-13	0.203583
cg16831889	HDC	1.17967e-12	3.61631e-13	0.203212
cg12336540	RCSD1	3.27649e-21	4.0923e-21	0.202895
cg08749917	RTP1	2.16676e-15	9.4602e-16	0.20277
cg05250458	ZNF177	2.98608e-11	7.85305e-12	0.202413
cg25711779	EFEMP1	7.07465e-14	2.51461e-14	0.202222
cg14611174	SIX6	2.34426e-14	8.91358e-15	0.201926
cg00970325	PAQR9	8.78641e-14	3.08767e-14	0.201788
cg14776962	HIST1H2BH	2.93218e-14	1.09834e-14	0.20173
cg18420965	EPHA5	5.52687e-13	1.77947e-13	0.201673
cg12584718	MEPCE	3.45223e-07	5.73369e-08	0.201569
cg09096031	RFTN2	2.80974e-20	2.8409e-20	0.201554
cg09656934	TDRD5	5.52687e-13	1.77947e-13	0.201398
cg08977371	CDH13	6.07205e-18	4.00263e-18	0.201377
cg00585790	LIMS1	9.45685e-10	2.09048e-10	0.201342
cg11934695	ADRA1D	1.71884e-09	3.66889e-10	0.201295
cg24719601	PHOX2B	3.9363e-19	3.27422e-19	0.201216
cg24169822	HOXA4	3.62347e-16	1.78268e-16	0.20091
cg25763788	HTR1B	1.4093e-14	5.55219e-15	0.200132
cg07846220	LAMA1	5.26878e-09	1.07027e-09	0.200097

## Sheet: Hypomethylated
Supplemental Table 1. Sheet 2: Genes significantly hypomethylated in tumor vs. NTL
Infinium Probe Name	Gene Name	Wilcoxon Rank p-value	Q-value	β-value difference
cg07014174	KRTAP11-1	3.17343e-27	2.37081e-26	-0.393623
cg23067535	FAM83A	1.27479e-25	5.09189e-25	-0.361296
cg26799474	CASP8	3.96916e-26	1.97686e-25	-0.34505
cg26530341	TNFRSF10A	2.65538e-26	1.44762e-25	-0.343675
cg20837735	SERPINB5	1.01935e-20	1.14868e-20	-0.342141
cg26738880	DPP6	1.50267e-31	7.57765e-30	-0.340873
cg05440289	IVL	1.5434e-19	1.35358e-19	-0.337172
cg16812893	KRTAP15-1	2.0213e-27	1.66417e-26	-0.333523
cg23213217	DEGS1	3.03161e-30	6.11512e-29	-0.33316
cg11206634	SFT2D3	3.678e-18	2.55827e-18	-0.329946
cg23147597	CEACAM19	6.17299e-23	1.16371e-22	-0.329483
cg14153740	TRYX3	3.91299e-20	3.79469e-20	-0.327517
cg08970694	HBE1	2.02449e-22	3.34724e-22	-0.321868
cg27342801	REG3A	3.94401e-24	1.00703e-23	-0.321858
cg26767897	XDH	2.5201e-24	6.86938e-24	-0.318754
cg24423088	KRTAP8-1	2.98481e-28	3.25444e-27	-0.315137
cg10368842	C10orf81	6.27761e-25	1.99413e-24	-0.31374
cg11204562	C10orf81	7.06835e-25	2.19349e-24	-0.312115
cg25388528	KRTAP20-1	9.31634e-28	8.5419e-27	-0.307766
cg25391023	BTNL2	6.12562e-32	4.11871e-30	-0.305577
cg04574507	CD1B	5.04091e-23	9.73026e-23	-0.304964
cg04947157	TMC6	6.12562e-32	4.11871e-30	-0.304496
cg24512973	MUC1	6.6186e-21	7.76193e-21	-0.301136
cg15606663	KRTAP15-1	2.45675e-22	3.94865e-22	-0.301068
cg00718513	IGKV7-3	3.96916e-26	1.97686e-25	-0.300113
cg11003133	AIM2	4.32269e-14	1.58103e-14	-0.299089
cg02906939	HNMT	7.67962e-16	3.6151e-16	-0.296552
cg02442161	PI3	1.66623e-22	2.83628e-22	-0.295634
cg23732024	LY96	1.30985e-11	3.59229e-12	-0.294081
cg20676475	LCE3D	2.99756e-21	3.77903e-21	-0.293151
cg20916523	VHL	1.91402e-21	2.52341e-21	-0.2929
cg02833180	PLCL1	2.16676e-15	9.4602e-16	-0.292882
cg14826683	SPRR2D	1.17221e-23	2.68692e-23	-0.292506
cg24240626	REG3A	8.34385e-23	1.52313e-22	-0.290994
cg15700197	OR10J1	2.75351e-15	1.18933e-15	-0.290209
cg08256691	RIT1	8.16979e-16	3.82354e-16	-0.290069
cg25072962	MS4A15	1.27453e-27	1.11778e-26	-0.289689
cg16431978	KRTAP13-3	1.33076e-21	1.82606e-21	-0.288557
cg22268164	TRHR	2.96028e-18	2.0915e-18	-0.28752
cg21614638	DAPP1	5.14809e-17	2.91285e-17	-0.286926
cg07525077	RNASE3	6.17299e-23	1.16371e-22	-0.286892
cg24949488	DNTT	4.38334e-25	1.47362e-24	-0.286427
cg18484189	NLRP10	3.47408e-26	1.84412e-25	-0.286371
cg10054857	C18orf20	1.14483e-17	7.18276e-18	-0.285384
cg20312687	DEFB118	3.17343e-27	2.37081e-26	-0.28493
cg12493906	MMP26	1.76392e-26	1.03131e-25	-0.2845
cg02764897	KRTAP13-1	1.10627e-24	3.23402e-24	-0.284342
cg04915566	RUNX1	6.79637e-12	1.9295e-12	-0.283733
cg18462653	DEFB119	6.71341e-26	3.00928e-25	-0.282479
cg24338843	C1orf158	3.18291e-18	2.22928e-18	-0.277952
cg05767404	C1orf150	1.80834e-15	7.973e-16	-0.277885
cg09868882	GRM8	6.66677e-15	2.72772e-15	-0.277828
cg20018806	TCN1	7.64243e-26	3.35124e-25	-0.277085
cg03872376	ZP4	2.01085e-20	2.09078e-20	-0.276205
cg07456201	UMOD	4.53141e-26	2.12568e-25	-0.274909
cg21201572	AGR2	1.20509e-30	2.85978e-29	-0.27452
cg14992108	SNTB1	6.12868e-24	1.46299e-23	-0.274052
cg20311730	NLRP10	1.91402e-21	2.52341e-21	-0.272188
cg09195271	RNF186	2.05532e-18	1.49939e-18	-0.27195
cg12108912	TMEM177	9.87922e-11	2.45262e-11	-0.271231
cg23413307	LCE1F	4.97723e-15	2.08292e-15	-0.269813
cg03109316	ZNF80	2.09474e-21	2.71726e-21	-0.269493
cg05615150	ARPP-21	1.60214e-15	7.14191e-16	-0.269408
cg21130374	MX2	1.10789e-21	1.5412e-21	-0.269065
cg08659707	PUM2	1.41886e-15	6.38128e-16	-0.26869
cg00187686	TCN1	9.45887e-24	2.19307e-23	-0.268508
cg04057858	T-SP1	4.79111e-22	7.18531e-22	-0.2683
cg10318258	RIPK3	3.96916e-26	1.97686e-25	-0.267874
cg05828624	REG1A	4.53141e-26	2.12568e-25	-0.26638
cg25433648	S100A14	8.94691e-25	2.67363e-24	-0.263974
cg15485859	C1orf116	4.53141e-26	2.12568e-25	-0.26393
cg26390526	FLG	8.90804e-15	3.5794e-15	-0.263868
cg17628717	HECW1	5.81658e-13	1.86086e-13	-0.263761
cg12019109	AZGP1	9.0842e-19	7.08856e-19	-0.263187
cg27622610	OR1G1	1.42147e-18	1.05804e-18	-0.26317
cg23111544	REG1A	8.69031e-16	4.04836e-16	-0.262018
cg22879289	NID1	4.94357e-25	1.59549e-24	-0.261769
cg01119135	C1orf116	3.53591e-29	4.91887e-28	-0.261531
cg02131853	TMEM156	1.06122e-28	1.33788e-27	-0.261242
cg10207745	C12orf36	5.00567e-20	4.78532e-20	-0.26107
cg14333454	SFN	3.17343e-27	2.37081e-26	-0.261009
cg27285599	ZNF750	2.17364e-13	7.38752e-14	-0.260249
cg02168291	CDH13	9.88361e-26	4.1106e-25	-0.260144
cg08319404	THRB	3.52861e-24	9.18403e-24	-0.258655
cg15979932	CUEDC1	1.01046e-21	1.42036e-21	-0.258472
cg15913671	TMEM105	7.95028e-28	7.45891e-27	-0.25827
cg03112433	CDK14	5.81658e-13	1.86086e-13	-0.257975
cg26656452	HABP2	2.12832e-28	2.52534e-27	-0.256652
cg06038133	CORO6	4.66567e-21	5.65239e-21	-0.256184
cg08411049	SERPINB5	1.20965e-20	1.33699e-20	-0.256165
cg14458615	IGSF11	6.05265e-10	1.36412e-10	-0.255821
cg00744433	CXADR	2.52237e-28	2.82662e-27	-0.254867
cg26164184	FCN2	6.12868e-24	1.46299e-23	-0.254865
cg21747271	AIP	2.69392e-25	9.45037e-25	-0.253626
cg14062083	KRTAP13-4	2.45312e-23	5.04922e-23	-0.253521
cg26789453	TMEM116	1.91354e-16	9.88434e-17	-0.2532
cg12878228	PRSS1	6.70015e-14	2.39416e-14	-0.25318
cg06793062	CNTNAP4	1.69895e-20	1.80368e-20	-0.252139
cg06850526	SLC38A10	8.68715e-26	3.73125e-25	-0.251451
cg24244000	GABRG3	4.11072e-23	8.12923e-23	-0.251278
cg13349425	C5orf20	1.06754e-17	6.76095e-18	-0.251039
cg19105504	MS4A15	2.63701e-16	1.33146e-16	-0.25054
cg23984130	IGKV7-3	1.22518e-18	9.23866e-19	-0.250152
cg22972055	UNC84A	1.03784e-11	2.87956e-12	-0.24922
cg13038560	C2orf47	1.63997e-25	6.24155e-25	-0.249057
cg18822544	KRTAP26-1	1.0368e-19	9.46315e-20	-0.247773
cg16678925	OR1A2	2.45312e-23	5.04922e-23	-0.247113
cg15983538	SEMA4A	1.80729e-19	1.57474e-19	-0.247087
cg25259754	FCRL3	8.64879e-18	5.5383e-18	-0.246951
cg04052038	CLDN8	5.00567e-20	4.78532e-20	-0.246637
cg25645462	GPR56	2.45675e-22	3.94865e-22	-0.245564
cg16173067	SDCBP2	7.81456e-19	6.16943e-19	-0.24495
cg24323726	ZBED2	4.79111e-22	7.18531e-22	-0.243411
cg18437633	ITGB6	3.94401e-24	1.00703e-23	-0.243068
cg15642035	FAM135B	9.0842e-19	7.08856e-19	-0.242409
cg16148454	TMED6	1.31979e-18	9.89655e-19	-0.241998
cg25943276	C11orf39	3.37357e-19	2.84129e-19	-0.241895
cg04958389	PRSS2	6.07205e-18	4.00263e-18	-0.240944
cg11297236	PDILT	3.21312e-17	1.87049e-17	-0.24076
cg01072821	T-SP1	1.61235e-23	3.51601e-23	-0.239918
cg16862361	XDH	4.92074e-24	1.2254e-23	-0.239171
cg17423978	SIRPD	1.01935e-20	1.14868e-20	-0.238576
cg23851011	S100A16	1.87148e-14	7.19733e-15	-0.238539
cg14732540	BRDT	1.5078e-15	6.75118e-16	-0.237991
cg15422147	SERPINB5	5.09367e-21	6.09765e-21	-0.237873
cg08999895	SLC22A18AS	1.70221e-15	7.53802e-16	-0.237716
cg23696949	LAMC2	1.30415e-23	2.93925e-23	-0.237194
cg04956511	PTPN6	5.49278e-24	1.35117e-23	-0.237122
cg13139843	KRTAP19-1	5.89291e-20	5.59375e-20	-0.236717
cg01835489	KRT8	5.89319e-26	2.73271e-25	-0.236692
cg27504299	TCL1B	1.22518e-18	9.23866e-19	-0.236502
cg08886154	PAX4	4.16081e-28	4.41729e-27	-0.236323
cg19392109	C15orf54	3.12232e-19	2.64626e-19	-0.236013
cg15387123	CLIC3	1.98336e-29	3.07744e-28	-0.234765
cg18818531	FOSL1	4.45709e-31	1.49841e-29	-0.233942
cg00446235	F11R	2.31878e-26	1.28144e-25	-0.233148
cg22477971	C1QB	5.55961e-21	6.59671e-21	-0.232927
cg19345602	PATE1	9.21934e-23	1.64571e-22	-0.232589
cg07072643	EMR3	1.41072e-17	8.74224e-18	-0.232426
cg03544379	OR7C2	3.10019e-14	1.15698e-14	-0.232315
cg23400451	MYH4	3.01906e-23	6.08981e-23	-0.232203
cg27000831	CCL8	3.73992e-11	9.77184e-12	-0.231883
cg11800672	SLC39A4	6.2885e-17	3.50889e-17	-0.231876
cg07374637	KRTAP19-5	3.31716e-20	3.26395e-20	-0.231829
cg21754343	LCE2B	2.01085e-20	2.09078e-20	-0.231189
cg13897627	FLJ44674	9.21354e-22	1.30879e-21	-0.230884
cg11921829	FCRL2	1.91354e-16	9.88434e-17	-0.230448
cg24898753	FTH1	1.85833e-25	6.87795e-25	-0.230327
cg22373097	KRTAP21-1	2.49105e-11	6.59848e-12	-0.229725
cg11750883	CRCT1	5.50387e-17	3.08817e-17	-0.229307
cg22730004	SPTA1	1.13718e-18	8.67229e-19	-0.229217
cg15952487	CD1B	6.71341e-26	3.00928e-25	-0.229188
cg17839611	GNGT2	1.45037e-23	3.19734e-23	-0.229104
cg26960719	KCNJ16	3.43829e-17	1.99294e-17	-0.229056
cg16158220	REG1P	1.73622e-17	1.05487e-17	-0.228957
cg03421300	SFN	5.75776e-31	1.78678e-29	-0.228824
cg21572897	CD80	3.05324e-20	3.04889e-20	-0.228752
cg10848367	SCGB1D2	7.21898e-21	8.44148e-21	-0.228646
cg07747336	PATE2	2.45312e-23	5.04922e-23	-0.228592
cg25298754	ZBED2	4.55292e-23	8.91629e-23	-0.228426
cg21909391	FLJ42393	2.13716e-12	6.3536e-13	-0.228346
cg06123346	ATP4A	7.41481e-29	9.6494e-28	-0.22802
cg20881888	ZMYND10	1.02485e-09	2.25437e-10	-0.227864
cg27513764	EFCAB3	9.79199e-19	7.53879e-19	-0.227634
cg03996822	RASSF6	1.0058e-24	2.96177e-24	-0.227379
cg00134787	MYH1	6.82757e-23	1.28112e-22	-0.2273
cg12397274	TINAG	8.69402e-26	3.73125e-25	-0.227051
cg24363955	C5orf23	5.93297e-15	2.44485e-15	-0.227023
cg02812142	ACMSD	1.53656e-26	9.39222e-26	-0.226985
cg09478478	CD1E	3.00231e-17	1.76047e-17	-0.226964
cg17405586	KRT1	2.21158e-18	1.60469e-18	-0.226721
cg25890048	OR5I1	2.04077e-16	1.04878e-16	-0.226663
cg24426405	AGR2	4.70162e-30	9.03213e-29	-0.226579
cg21282997	IL18RAP	1.22518e-18	9.23866e-19	-0.22647
cg25538571	FLJ46365	2.6806e-13	9.02688e-14	-0.226137
cg15078027	CCDC130	1.13935e-11	3.15254e-12	-0.225398
cg09988116	C1orf210	1.01935e-20	1.14868e-20	-0.225385
cg00626466	GNS	3.05324e-20	3.04889e-20	-0.225165
cg17827767	LRIT1	1.20965e-20	1.33699e-20	-0.2244
cg01888566	MEST	8.83101e-20	8.13388e-20	-0.224305
cg09243900	RAB25	2.72192e-23	5.57405e-23	-0.223631
cg07947016	KLK2	1.42147e-18	1.05804e-18	-0.222957
cg09837943	ZIM2	1.7743e-18	1.3062e-18	-0.222417
cg01946401	RUNX2	3.13434e-13	1.04501e-13	-0.221075
cg06690548	SLC7A11	6.51905e-18	4.26246e-18	-0.220929
cg22862656	SCGB2A2	2.47949e-14	9.37473e-15	-0.220878
cg07837085	SLAMF7	5.43174e-20	5.18037e-20	-0.220677
cg12348970	SLC24A2	2.05532e-18	1.49939e-18	-0.220339
cg21902327	FGF6	1.0058e-24	2.96177e-24	-0.220217
cg25864727	NCRNA00158	2.34426e-14	8.91358e-15	-0.220092
cg18940763	XBP1	5.88349e-17	3.29201e-17	-0.220068
cg06226384	CACNG5	3.15553e-24	8.43058e-24	-0.219182
cg07785936	GPR39	1.48805e-27	1.27727e-26	-0.219168
cg08634024	OR2F1	3.62347e-16	1.78268e-16	-0.219143
cg00392257	ISG20L2	1.01046e-21	1.42036e-21	-0.218811
cg02477931	C11orf39	1.58749e-10	3.83492e-11	-0.217576
cg17657618	RP1-21O18.1	1.4093e-14	5.55219e-15	-0.217101
cg00579393	REG1B	3.85661e-13	1.27112e-13	-0.217094
cg03082060	LGALS8	1.44636e-25	5.66501e-25	-0.21703
cg14709481	HK3	1.66623e-22	2.83628e-22	-0.216836
cg15046693	CEBPG	3.62347e-16	1.78268e-16	-0.216667
cg04806409	TFF3	1.27479e-25	5.09189e-25	-0.216418
cg03019000	TEX264	2.29194e-21	2.95407e-21	-0.21635
cg16592658	EBI3	2.1762e-16	1.1099e-16	-0.215571
cg22487322	IL20RA	3.84691e-10	8.9243e-11	-0.215549
cg00463848	KRT2	3.93253e-15	1.66822e-15	-0.215353
cg06489008	CST11	2.11476e-19	1.81907e-19	-0.215347
cg08214029	CCL18	5.00567e-20	4.78532e-20	-0.214461
cg05072008	FIGNL1	1.43638e-08	2.78323e-09	-0.214445
cg17738194	GK2	4.97723e-15	2.08292e-15	-0.214377
cg00466249	SLC38A10	4.93547e-27	3.37472e-26	-0.214333
cg18833140	HABP2	6.35143e-22	9.28377e-22	-0.212917
cg20775254	PROM2	6.7757e-28	6.8337e-27	-0.212832
cg25612480	UBE2V2	1.31729e-20	1.44803e-20	-0.212753
cg00679556	TRIM31	8.408e-15	3.39199e-15	-0.212753
cg01580568	LAMB3	2.70511e-22	4.33058e-22	-0.212508
cg15441973	HNMT	1.13845e-16	6.10743e-17	-0.212481
cg24642468	C16orf78	4.3589e-22	6.66093e-22	-0.212246
cg03684977	GRB7	4.40636e-24	1.10412e-23	-0.212173
cg17439694	CP	1.34971e-13	4.65789e-14	-0.211894
cg07637239	KCNK18	1.5434e-19	1.35358e-19	-0.211829
cg25737664	SIRPD	2.28696e-19	1.95884e-19	-0.211759
cg17399166	CD1D	7.07465e-14	2.51461e-14	-0.211622
cg17542385	LCE4A	2.75438e-10	6.47166e-11	-0.21144
cg21478437	CTSE	1.03276e-13	3.61353e-14	-0.211059
cg25964007	WDR16	1.29721e-16	6.90401e-17	-0.211032
cg10968815	BPIL1	4.06101e-13	1.33304e-13	-0.21096
cg01772980	SCGB1D1	3.62347e-16	1.78268e-16	-0.210524
cg10414946	MS4A2	2.02449e-22	3.34724e-22	-0.210032
cg01479232	C20orf54	6.51905e-18	4.26246e-18	-0.210006
cg24654350	KIR3DL1	7.65399e-22	1.09886e-21	-0.210005
cg12619162	FXYD4	4.50231e-17	2.56183e-17	-0.209816
cg26322315	RPA3	6.22718e-19	5.02439e-19	-0.209511
cg08132711	FGFBP2	1.5078e-15	6.75118e-16	-0.208934
cg27285056	NAPSA	2.45675e-22	3.94865e-22	-0.208803
cg02044879	PLA2G12B	1.14483e-17	7.18276e-18	-0.208723
cg07643942	LACRT	2.3009e-15	1.00133e-15	-0.208263
cg05697976	FAR2	2.32734e-10	5.51324e-11	-0.208235
cg07908874	TUBGCP2	4.25084e-19	3.51412e-19	-0.208067
cg06022562	ZNF750	3.66221e-13	1.21001e-13	-0.207865
cg25974617	TRAM1	2.44736e-17	1.46054e-17	-0.207683
cg27465569	PUS7L	5.09367e-21	6.09765e-21	-0.207462
cg13688966	TM4SF4	1.56114e-20	1.67947e-20	-0.207364
cg07705908	SPDEF	3.31716e-20	3.26395e-20	-0.206675
cg20910746	BBOX1	1.83693e-22	3.10068e-22	-0.206171
cg05109049	EVI2B	5.04055e-05	6.65187e-06	-0.206141
cg03780486	OR6A2	1.49183e-14	5.84312e-15	-0.206045
cg03914397	NMUR2	2.09474e-21	2.71726e-21	-0.205639
cg02337447	SCO1	1.12309e-19	1.01816e-19	-0.205512
cg17741572	CFB	7.12568e-12	2.01448e-12	-0.205441
cg26388152	CORO6	6.12868e-24	1.46299e-23	-0.205204
cg20556988	CCL1	5.65488e-18	3.75216e-18	-0.205135
cg27562023	RPH3AL	5.65488e-18	3.75216e-18	-0.204949
cg12447832	TTC15	4.24756e-18	2.89454e-18	-0.204683
cg21591452	TMEM105	4.50181e-13	1.46818e-13	-0.204365
cg26709720	B3GALT5	9.98639e-17	5.40772e-17	-0.203771
cg13699808	ZMYND8	5.26466e-22	7.77982e-22	-0.203252
cg05246522	KSR1	1.52677e-09	3.27451e-10	-0.203204
cg06233985	HBB	3.67875e-17	2.12317e-17	-0.203131
cg05788638	SERPINA10	1.95516e-19	1.69991e-19	-0.202489
cg09577651	SIRPB1	3.43829e-17	1.99294e-17	-0.202056
cg21846488	LCE4A	1.12212e-12	3.45039e-13	-0.201736
cg16886259	CYSLTR2	5.14809e-17	2.91285e-17	-0.201429
cg14034870	SFTA2	9.21934e-23	1.64571e-22	-0.201345
cg04996020	SLC26A3	1.55703e-14	6.09257e-15	-0.201338
cg14036856	C1orf210	3.42739e-31	1.25699e-29	-0.200875
cg04740359	NTF3	3.66223e-14	1.35049e-14	-0.20067
cg02946850	GRM8	1.49183e-14	5.84312e-15	-0.200411
cg20162076	LY86	1.13718e-18	8.67229e-19	-0.200368
cg24977027	THNSL2	1.92089e-15	8.45075e-16	-0.200346
cg14114267	SP3	7.95028e-28	7.45891e-27	-0.200343
cg13259290	CSF2	2.97769e-22	4.71087e-22	-0.200205
cg05436231	CD164L2	6.71792e-19	5.40952e-19	-0.200163
cg18931815	COL8A2	3.19205e-16	1.58981e-16	-0.200111
cg16446783	MRGPRX4	5.98931e-16	2.84933e-16	-0.200041
