# Supplementary material for: Genome-scale analysis of DNA methylation in lung adenocarcinoma and integration with mRNA expression
Source: HighWire-hosted journal article supplement (doi:10.1101/gr.132662.111), 2012-05-21
Supplement: Selamat_Suppl_Table2.xlsx [file Selamat_Suppl_Table2.xlsx]

## Sheet: Sheet1
Supplemental Table 2. Validation sample characteristics
Characteristics	Classes	NTL	Tumor
Tissue Source*	OTB	20	21
	USC	7	7
Sex**	Male	11	11
	Female	13	14
Race***	Asian	2	2
	Caucasian	3	3
Stage****	Stage I-II		14
	Stage III-IV		6
*17 OTB samples were paired, and all 7 USC sampleswere paired
**Information not available for 3 subjects
***Information only available for 5 subjects
**** Information not available from 8 subjects
