# Supplementary material for: Genome-scale analysis of DNA methylation in lung adenocarcinoma and integration with mRNA expression
Source: HighWire-hosted journal article supplement (doi:10.1101/gr.132662.111), 2012-05-21
Supplement: Selamat_Suppl_Table3.xlsx [file Selamat_Suppl_Table3.xlsx]

## Sheet: Downregulated
Gene Name	t-test p-value	BH p-value	Fold change (log2)
HBB	3.39493e-41	4.01168e-39	-4.14887
HBA1	5.09466e-37	4.01346e-35	-3.80674
MAMDC2	4.54237e-37	4.01346e-35	-2.7267
TEK	1.11243e-46	1.97177e-44	-2.71429
SPARCL1	1.05168e-36	7.45639e-35	-2.66069
CLDN5	1.75798e-33	6.92451e-32	-2.58584
C7	7.12327e-26	1.74152e-24	-2.46632
CLEC14A	1.48963e-33	6.21264e-32	-2.34867
EFEMP1	1.21866e-25	2.7872e-24	-2.2544
SOSTDC1	1.42099e-29	4.19784e-28	-2.1237
HOXA5	1.97315e-30	6.66174e-29	-2.08978
SOCS2	5.47738e-24	1.02196e-22	-2.02932
CYYR1	5.55415e-44	7.87579e-42	-2.00541
MAL	3.05619e-20	4.01267e-19	-1.95134
JAM2	3.805e-48	8.99248e-46	-1.87817
SCARA5	7.22356e-36	4.65591e-34	-1.82783
ABCA3	6.84908e-21	9.52156e-20	-1.79414
LTC4S	4.68547e-35	2.36577e-33	-1.76986
CLIC3	1.30018e-16	1.21293e-15	-1.75354
EVI2B	1.39771e-25	3.09681e-24	-1.74127
ACVRL1	2.24551e-35	1.22466e-33	-1.7179
ALDH1A2	3.54795e-21	5.24061e-20	-1.71006
TOX2	1.63492e-28	4.63664e-27	-1.68308
CSF3R	4.90441e-16	4.29287e-15	-1.67798
C1QB	8.66325e-18	8.5309e-17	-1.66183
CLEC1A	1.43752e-51	1.0192e-48	-1.60193
NDRG2	2.24364e-31	8.37233e-30	-1.58118
TMEM204	4.44902e-27	1.16828e-25	-1.53991
CDO1	9.67221e-36	5.71467e-34	-1.53513
LY86	1.57605e-19	1.89394e-18	-1.53441
CTNNAL1	2.50778e-24	4.93894e-23	-1.51246
MS4A2	4.25604e-34	1.88596e-32	-1.50471
SPON1	1.53871e-19	1.88094e-18	-1.45761
MS4A15	2.69811e-16	2.42147e-15	-1.44815
RHOJ	3.30488e-48	8.99248e-46	-1.44745
SLC15A3	5.19767e-19	5.94379e-18	-1.43046
EFCAB1	1.493e-11	8.74822e-11	-1.39349
TUBB6	1.36658e-19	1.69983e-18	-1.392
ZBED2	3.32086e-20	4.28089e-19	-1.3912
DOCK2	2.73346e-23	4.84505e-22	-1.38989
ICAM2	1.1163e-21	1.72056e-20	-1.35369
ADCY4	5.6597e-25	1.14649e-23	-1.32189
FGFBP2	4.48351e-23	7.75319e-22	-1.26501
SNRPN	1.11346e-12	7.37797e-12	-1.26095
SCN4B	2.87219e-25	5.98936e-24	-1.16204
EPB41L3	2.53144e-16	2.30101e-15	-1.15392
GATA2	9.19863e-23	1.55282e-21	-1.14706
SOX17	3.7897e-30	1.16822e-28	-1.13975
TM6SF1	8.16627e-41	8.27126e-39	-1.13957
PRX	1.12351e-22	1.85248e-21	-1.11116
HDC	3.11778e-14	2.27887e-13	-1.10951
ZEB2	5.00516e-35	2.36577e-33	-1.09725
C1orf87	1.34906e-12	8.77506e-12	-1.01955
CDH13	1.95507e-25	4.20043e-24	-1.01073
CCL18	1.64453e-09	8.32838e-09	-1.00676
HK3	3.70763e-14	2.65527e-13	-0.997841
C5orf4	1.12e-08	5.15638e-08	-0.982674
PDE8B	1.55561e-14	1.21201e-13	-0.982057
GAS7	1.22278e-23	2.22295e-22	-0.952146
PRKCB	1.67385e-14	1.28996e-13	-0.948263
RFTN2	1.21178e-22	1.90923e-21	-0.921383
SFRP1	8.96765e-12	5.38819e-11	-0.914028
CYGB	4.61125e-15	3.67345e-14	-0.899341
WDR16	7.64747e-11	4.37263e-10	-0.875847
NCALD	3.80594e-09	1.81101e-08	-0.856224
CMTM2	5.81331e-17	5.56978e-16	-0.851968
FAR2	1.15847e-22	1.86672e-21	-0.834134
SPAG6	1.654e-07	7.02206e-07	-0.831165
CPXM2	1.49236e-07	6.41264e-07	-0.818755
FTH1	1.15039e-05	4.05783e-05	-0.801222
IFFO1	2.39027e-14	1.80287e-13	-0.795097
ZMYND10	2.62176e-07	1.07675e-06	-0.787024
NAPSA	0.000460829	0.00131745	-0.785138
SFTA2	0.000189659	0.000567375	-0.779232
WNT2	4.39408e-26	1.11264e-24	-0.770818
IL18RAP	4.66836e-13	3.18257e-12	-0.760985
H2AFY	1.93335e-12	1.24613e-11	-0.75551
RASSF1	2.77901e-21	4.19216e-20	-0.751742
NTM	0.000599845	0.00169438	-0.744751
PODN	1.48208e-06	5.74205e-06	-0.732375
KCNA5	3.93387e-18	3.98445e-17	-0.730245
LEFTY2	6.43097e-18	6.42192e-17	-0.7169
LAMA2	6.65693e-17	6.29302e-16	-0.716573
CXCL5	2.64142e-08	1.19284e-07	-0.713485
C5orf23	5.63298e-12	3.53432e-11	-0.697985
CCL8	0.000346344	0.00100228	-0.697237
PENK	8.71564e-11	4.90428e-10	-0.68459
GJA5	1.05716e-15	8.92297e-15	-0.674493
CYTL1	3.64891e-15	2.97366e-14	-0.670912
C1orf158	3.24888e-09	1.56698e-08	-0.647784
AKAP12	1.48313e-18	1.59324e-17	-0.635735
C10orf26	7.61585e-12	4.69534e-11	-0.633212
RUNX3	1.10462e-06	4.30318e-06	-0.631948
HLF	2.33094e-09	1.14767e-08	-0.60946
HNMT	1.03956e-08	4.81732e-08	-0.59086
HOXA4	6.92274e-16	5.91352e-15	-0.588983
CA3	2.35212e-13	1.61908e-12	-0.582819
ANGPTL2	4.05321e-05	0.000134286	-0.577361
TBX4	7.84669e-19	8.83064e-18	-0.562334
MYH4	9.83348e-14	6.9029e-13	-0.559614
ITGA8	3.79298e-05	0.00012685	-0.550193
CD248	7.85245e-05	0.000245259	-0.536957
FGF2	1.48308e-18	1.59324e-17	-0.526589
HOXA2	1.713e-19	2.02419e-18	-0.52338
C1orf116	2.92538e-05	0.000100198	-0.505015
RAB37	5.33139e-06	1.96873e-05	-0.501579
STAT5A	3.42922e-07	1.38143e-06	-0.498092
SMOC2	2.57172e-05	8.85121e-05	-0.497803
EMR3	1.67269e-16	1.54018e-15	-0.48365
TMEM116	9.79369e-07	3.85763e-06	-0.476693
FAM124B	8.82008e-11	4.92397e-10	-0.469489
SYDE1	1.03779e-10	5.70382e-10	-0.468588
SCN2B	3.69498e-18	3.79672e-17	-0.466941
CFTR	3.20507e-05	0.000108727	-0.459445
HSPA2	0.00402897	0.0098163	-0.453252
CCDC81	6.77349e-10	3.53118e-09	-0.445641
RUNX1T1	5.57229e-07	2.21952e-06	-0.438774
PTPN6	6.10317e-05	0.000197587	-0.422174
NPR2	1.27228e-12	8.35228e-12	-0.418502
DEGS1	1.709e-05	5.91063e-05	-0.402725
ARHGEF15	1.08672e-12	7.26872e-12	-0.383409
ZSCAN1	1.6915e-18	1.78996e-17	-0.383145
SHANK2	1.49262e-06	5.75145e-06	-0.382699
SLC2A14	1.46789e-11	8.67281e-11	-0.37107
CCNA1	6.24934e-06	2.27219e-05	-0.362624
KCNJ16	8.84033e-06	3.16555e-05	-0.357327
GNGT2	2.19925e-09	1.0904e-08	-0.356513
HS3ST2	0.0114755	0.0251892	-0.355357
CCDC65	6.46878e-09	3.01735e-08	-0.33461
TCTEX1D1	8.51473e-11	4.82955e-10	-0.331529
RCSD1	3.04839e-08	1.35931e-07	-0.319606
CRMP1	0.0118162	0.025857	-0.310739
DDR2	0.0133548	0.0289557	-0.30612
IL20RA	5.77378e-05	0.00018778	-0.299675
SULT1C4	3.97485e-15	3.20246e-14	-0.295904
PDZRN3	9.40504e-14	6.66818e-13	-0.287353
ATP5G2	0.00488455	0.0116604	-0.285276
DPP6	1.88472e-07	7.95396e-07	-0.284641
BCL2	0.0217571	0.0451047	-0.279434
NRN1	7.83714e-12	4.74917e-11	-0.259636
IGSF21	0.00305315	0.00762212	-0.259101
IGF1	5.88201e-06	2.14966e-05	-0.252556
PGLYRP1	9.15087e-11	5.06873e-10	-0.251803
ADCYAP1	0.000498558	0.00141959	-0.236763
PLCL1	3.32001e-19	3.85883e-18	-0.221601
KRT1	2.82639e-07	1.15167e-06	-0.209596
ZNF385D	0.000350377	0.00100983	-0.195351
LRFN5	1.75184e-14	1.33554e-13	-0.192626
CBLN4	2.5977e-06	9.69352e-06	-0.188164
HOXD12	0.000211586	0.00062506	-0.187792
MMP2	0.000443073	0.00127182	-0.186499
TLL1	1.04505e-09	5.36913e-09	-0.184144
LIN7A	1.80471e-18	1.88167e-17	-0.184109
EYA4	6.25613e-05	0.000199802	-0.183593
ADORA2A	0.0239192	0.0487413	-0.18127
PUM2	0.0239925	0.0487413	-0.167962
TAL1	3.42938e-09	1.64286e-08	-0.167421
GATA3	1.22455e-07	5.29394e-07	-0.166157
ADRA1A	2.70979e-14	2.02236e-13	-0.165106
HOXB4	0.00446598	0.0106972	-0.161127
BTNL2	6.28216e-08	2.76649e-07	-0.160454
GK2	0.0073838	0.0169421	-0.157681
SIRPB1	0.00281441	0.00710114	-0.15495
SLC22A16	0.000134174	0.000407589	-0.145812
CASP8	0.000134522	0.000407589	-0.142921
MCAM	1.62411e-06	6.22428e-06	-0.139492
NTF3	0.0110726	0.0245328	-0.133544
DPYS	1.29595e-05	4.52625e-05	-0.13187
ZNF177	0.0211745	0.0440255	-0.131148
HOXC11	0.00218324	0.00556806	-0.129586
NID1	0.00627456	0.0147796	-0.127057
CORO6	0.000315392	0.00092402	-0.126095
SIRPD	1.53818e-10	8.38901e-10	-0.123497
DIO3	8.93834e-10	4.62575e-09	-0.120811
PTGDR	1.47126e-05	5.11334e-05	-0.119294
EDN3	0.00217547	0.00556806	-0.11831
NTRK3	1.95392e-07	8.1972e-07	-0.1163
PDE4DIP	0.0107999	0.0240036	-0.116286
ADCY8	2.18777e-07	9.07093e-07	-0.111677
CCDC8	0.00419317	0.0101121	-0.106422
CD8B	6.17996e-05	0.000199163	-0.0998403
ADCY2	0.0015567	0.00408778	-0.0975037
WT1	0.00963984	0.0216286	-0.0880412
FLT4	3.4105e-06	1.26599e-05	-0.084737
MAGI2	2.57033e-06	9.64215e-06	-0.0847347
NPY5R	2.2406e-06	8.49512e-06	-0.0843168
PRRT1	0.00141389	0.0037686	-0.0841088
LRRC3	0.00407457	0.0098934	-0.0840787
VWC2	0.00063021	0.00174539	-0.0822122
GIPC2	1.27616e-05	4.4792e-05	-0.0792963
FOXI2	1.84692e-06	7.04013e-06	-0.0778919
VSX2	0.00647723	0.0151064	-0.0768088
SLC27A6	0.00194248	0.00498993	-0.0762694
RNASE3	0.000618852	0.0017215	-0.0712897
HOXD9	0.018148	0.0381807	-0.0695495
ACTA1	0.00576718	0.0137212	-0.0686276
CD80	0.0184066	0.0386104	-0.0669656
NOVA2	0.0160478	0.0340655	-0.0619054
NALCN	9.67499e-05	0.000299544	-0.0597917
GRIA1	0.00289769	0.00728532	-0.0551339
WFIKKN2	0.00686941	0.0158645	-0.0533156
GDNF	0.0238295	0.0487413	-0.0515005
HPSE2	0.000198643	0.000591757	-0.0487119
TBX5	0.00677811	0.0157048	-0.0455151
HOXA7	0.0128096	0.0279447	-0.0425429
PRAC	0.00412977	0.0099932	-0.0418097
PCDHB15	0.00606074	0.0143235	-0.0384998
KLF14	0.00855339	0.019437	-0.0380943
SOX1	0.00806068	0.0184355	-0.0366754

## Sheet: Upregulated
Gene Name	t-test p-value	BH p-value	Fold change (log2)
EEF1A2	7.15536e-15	5.63684e-14	2.90117
COMP	2.1894e-17	2.12641e-16	2.44836
PROM2	3.54439e-30	1.14226e-28	2.34405
SFN	1.12826e-25	2.66647e-24	2.16819
FAM83A	6.09521e-21	8.81939e-20	2.0956
KRT8	6.81983e-28	1.85972e-26	1.9459
SPDEF	2.89391e-20	3.87129e-19	1.94491
CELSR3	6.30165e-21	8.93574e-20	1.5598
COL5A2	3.09532e-14	2.27887e-13	1.42887
CFB	5.76525e-10	3.02782e-09	1.40777
TCN1	7.26962e-06	2.62967e-05	1.3861
TM4SF4	2.47633e-06	9.33893e-06	1.37922
AGR2	7.79445e-12	4.74917e-11	1.26134
MX2	3.27172e-14	2.36699e-13	1.22628
ZNF750	5.46946e-13	3.69319e-12	1.22109
AIM2	3.25228e-11	1.89005e-10	1.18026
HABP2	4.57209e-10	2.41911e-09	1.17223
GRB7	5.12682e-24	9.8241e-23	1.16124
RAB25	2.3263e-20	3.17182e-19	1.11967
ACOT11	1.48174e-15	1.22157e-14	1.05158
LAMB3	2.62733e-07	1.07675e-06	1.03066
KRT86	2.1696e-09	1.08327e-08	0.929397
CUEDC1	3.16141e-09	1.54582e-08	0.912124
S100A16	2.80589e-08	1.2591e-07	0.911902
CLIC6	0.000204758	0.000607419	0.895271
THNSL2	2.04222e-07	8.51727e-07	0.881388
TMPRSS6	1.58241e-08	7.19185e-08	0.864129
GREM1	2.06699e-12	1.32027e-11	0.855029
CP	1.85759e-09	9.34067e-09	0.848771
SLC38A10	5.57688e-16	4.82196e-15	0.827415
RUNX1	1.1241e-18	1.24529e-17	0.826908
TMEM177	3.93128e-31	1.39364e-29	0.787599
SLC4A11	4.69566e-09	2.20478e-08	0.743858
FOXD2	7.36046e-12	4.57769e-11	0.73891
XDH	3.33348e-16	2.9543e-15	0.730166
PKMYT1	1.08988e-15	9.0909e-15	0.728754
WDR86	9.39401e-06	3.33018e-05	0.697329
TMC6	2.22338e-10	1.19423e-09	0.696388
CDKN2A	8.71941e-06	3.1381e-05	0.6861
C10orf81	0.000178099	0.000535052	0.657219
ISL1	4.18027e-05	0.000137852	0.639279
WDR8	4.99125e-20	6.31928e-19	0.634362
UCHL1	0.00184101	0.00476379	0.632832
SERPINB5	9.32155e-05	0.000289868	0.631147
TNFRSF10A	1.92893e-10	1.04398e-09	0.622976
ZMYND8	2.24536e-12	1.42139e-11	0.613893
PLEKHA6	6.7585e-08	2.95789e-07	0.613425
NOX4	1.23158e-08	5.63348e-08	0.608249
HOXC9	4.62368e-09	2.18546e-08	0.591436
TRIM31	5.84203e-06	2.14611e-05	0.564804
PDE4C	4.34484e-07	1.74039e-06	0.556305
AZGP1	0.0235784	0.0484554	0.493655
SDCBP2	0.00383264	0.00937013	0.488041
NPTX2	0.00126311	0.00339221	0.487613
RPA3	9.33733e-06	3.32672e-05	0.481409
C20orf54	9.95498e-14	6.91969e-13	0.471194
GNG4	0.000121928	0.000372618	0.462643
HIST1H4H	3.71565e-05	0.000124853	0.459715
PAX7	0.000113405	0.00034807	0.450173
THBS4	0.00162123	0.00424152	0.437911
CNTNAP2	0.000767903	0.00209401	0.42368
S100A14	0.00295006	0.00739078	0.420689
CASP2	1.3753e-11	8.19401e-11	0.413117
SOX11	0.00154869	0.00408186	0.408336
PAK2	7.62307e-05	0.000239148	0.396605
ONECUT2	4.53319e-05	0.000148798	0.378093
PRSS1	0.000609696	0.00170859	0.371766
SPRR2D	0.00932248	0.020983	0.368623
BRDT	6.49083e-05	0.000206307	0.363136
INA	0.00164194	0.0042799	0.345665
TMEM105	1.23373e-09	6.29291e-09	0.332677
POU4F1	0.000235989	0.000694258	0.332229
RPH3AL	0.00135791	0.00363305	0.33179
NKX3-2	3.58615e-05	0.000121075	0.327574
HOXB8	0.00341721	0.00844181	0.32259
GABBR2	0.000604482	0.00170071	0.322396
DLK1	0.015263	0.0325948	0.314661
NEFH	0.00582846	0.0138207	0.306136
RIT1	0.00146118	0.00388006	0.304307
TCL1B	3.03389e-10	1.61732e-09	0.30133
ZNF574	3.20087e-09	1.5544e-08	0.295786
DLX5	0.000552316	0.00156637	0.295104
LGALS8	0.0143191	0.0307643	0.281904
ASCL2	0.0239771	0.0487413	0.274809
CCDC140	0.000332418	0.000969894	0.271025
CSPG5	3.96104e-05	0.000131849	0.266566
RUNX2	0.000339405	0.000986221	0.229264
SCUBE3	6.51802e-05	0.000206307	0.209455
C12orf34	5.355e-08	2.37294e-07	0.205121
GPC2	9.52592e-07	3.77312e-06	0.196926
FIGNL1	1.59252e-07	6.80177e-07	0.19485
WRN	0.00193742	0.00498993	0.194696
SLC8A2	0.00671297	0.0156049	0.194274
MEST	1.0142e-06	3.97276e-06	0.193407
TTC15	0.00257076	0.00650953	0.191705
MSC	0.00101543	0.00274785	0.18389
LHX2	0.00908832	0.0205211	0.179774
HOXD3	0.00110163	0.00296979	0.175961
HIST1H2AE	0.000100364	0.000309383	0.174844
SLC7A11	0.000801861	0.00217824	0.173294
PAX9	0.00356423	0.00874407	0.172698
STMN2	0.0231737	0.0479013	0.172595
HIST1H3D	6.91642e-05	0.000217944	0.172213
TDRD5	3.41614e-07	1.38143e-06	0.171997
HIST1H4E	1.03208e-07	4.48925e-07	0.166106
C2orf47	0.0209767	0.0437426	0.155643
TMEM171	0.000716711	0.00196196	0.152245
TNFSF4	0.00817697	0.0186414	0.150506
ACMSD	0.000645689	0.00177439	0.149668
NMBR	5.48668e-11	3.16265e-10	0.142983
SLAMF7	0.0112794	0.0249132	0.140792
GJB6	0.00335817	0.00832497	0.134196
WNK2	0.000619159	0.0017215	0.131338
HIST1H2BH	3.18262e-05	0.000108485	0.127686
HIST1H3F	0.000169646	0.000511827	0.124248
SMPD3	0.00881748	0.0199731	0.122941
ACTN2	0.0180225	0.0380296	0.116378
RASSF6	0.00176412	0.00458155	0.108463
KSR1	5.71881e-05	0.00018685	0.106017
BNC1	0.00644634	0.015084	0.101344
TMEM156	0.00638035	0.014979	0.0970971
GRIK2	0.000644136	0.00177439	0.09423
PTPRN	0.013485	0.0291489	0.0928971
BHMT	0.00730222	0.0168093	0.0909959
ZNF48	6.24951e-05	0.000199802	0.0863425
HOXA13	0.00252294	0.00641134	0.079958
PCDH8	0.0145684	0.0312054	0.0703368
SULT4A1	0.00327092	0.00813713	0.0695159
CHAT	0.00430107	0.0103371	0.0687944
PPFIA2	0.0155485	0.0331049	0.0658869
ADAM12	0.00151887	0.00401821	0.059535
RAX	0.0202028	0.0422532	0.0572659
ZNF667	0.0114316	0.0251708	0.0551734
HIST1H1A	0.0105545	0.0235318	0.0532504
HOXD4	0.0233742	0.0481753	0.0488908
FGF6	0.0163443	0.0345913	0.0412957
PDILT	0.00354519	0.00872757	0.0371014
LRIT1	0.00992172	0.0221908	0.0359733
PHOX2A	0.0132039	0.0287165	0.0337308
DRD5	0.0137906	0.0297189	0.0330194

## Sheet: Hyper&Down
Supplemental Table 3. Sheet 1: Genes significantly hypermethylated and downregulated
	DNA methylation		Gene Expression
	Q-value	β-value difference	BH p-value	Fold change (log2)
ABCA3	9.89655e-19	0.528095	9.52e-20	-1.794
ACTA1	7.97e-16	0.271995	0.0137212	-0.069
ACVRL1	7.54e-19	0.217074	1.22e-33	-1.718
ADCY2	4.39e-13	0.296056	0.00408778	-0.098
ADCY4	7.66e-13	0.252536	1.15e-23	-1.322
ADCY8	7.68e-18	0.406999	9.07e-07	-0.112
ADCYAP1	4.68e-19	0.235938	0.00141959	-0.237
ADORA2A	1.61e-11	0.250063	0.0487413	-0.181
ADRA1A	6.66e-22	0.272668	2.02e-13	-0.165
AKAP12	1.34e-20	0.221084	1.59e-17	-0.636
ALDH1A2	1.55e-11	0.207191	5.24e-20	-1.71
ANGPTL2	9.56e-08	0.231604	0.000134286	-0.577
ARHGEF15	4.48e-15	0.239036	7.27e-12	-0.383
ATP5G2	7.15e-10	0.23731	0.0116604	-0.285
BCL2	1.21e-07	0.226683	0.0451047	-0.279
C10orf26	1.12e-15	0.278192	4.7e-11	-0.633
C1orf87	1.95e-06	0.233347	8.78e-12	-1.02
C5orf4	2.4e-16	0.216616	5.16e-08	-0.983
C7	1.82e-19	0.265162	1.74e-24	-2.466
CA3	5.59e-24	0.283431	1.62e-12	-0.583
CBLN4	6.34e-18	0.263686	9.69e-06	-0.188
CCDC65	5.84e-15	0.21254	3.02e-08	-0.335
CCDC8	1.8e-20	0.224221	0.0101121	-0.106
CCDC81	2.89e-18	0.259186	3.53e-09	-0.446
CCNA1	3.74e-12	0.231434	2.27e-05	-0.363
CD248	1.68e-11	0.222082	0.000245259	-0.537
CD8B	3.59e-12	0.329593	0.000199163	-0.1
CDH13	1.37e-17	0.28214	4.2e-24	-1.011
CDO1	1.26e-29	0.379865	5.71e-34	-1.535
CFTR	1.35e-14	0.309803	0.000108727	-0.459
CLDN5	6.66e-22	0.20829	6.92e-32	-2.586
CLEC14A	2.69e-16	0.263106	6.21e-32	-2.349
CLEC1A	4.26e-18	0.21461	1.02e-48	-1.602
CMTM2	8.43e-24	0.470891	5.57e-16	-0.852
CPXM2	2.84e-19	0.314171	6.41e-07	-0.819
CRMP1	1.7e-13	0.31167	0.025857	-0.311
CSF3R	3.55e-11	0.314312	4.29e-15	-1.678
CTNNAL1	8.77e-09	0.211089	4.94e-23	-1.512
CXCL5	3.95e-17	0.315905	1.19e-07	-0.713
CYGB	1.59e-23	0.293551	3.67e-14	-0.899
CYTL1	2.05e-13	0.236639	2.97e-14	-0.671
CYYR1	1.15e-20	0.33649	7.88e-42	-2.005
DDR2	1.47e-24	0.237323	0.0289557	-0.306
DIO3	5.19e-18	0.312934	4.63e-09	-0.121
DOCK2	3.52e-18	0.334756	4.85e-22	-1.39
DPYS	8.13e-20	0.473343	4.53e-05	-0.132
EDN3	2.89e-18	0.403453	0.00556806	-0.118
EFCAB1	7.3e-08	0.241034	8.75e-11	-1.393
EFEMP1	2.51e-14	0.202222	2.79e-24	-2.254
EPB41L3	4.11e-10	0.23988	2.3e-15	-1.154
EYA4	1.37e-09	0.391184	0.000199802	-0.184
FAM124B	2.54e-16	0.313659	4.92e-10	-0.469
FGF2	1.26e-28	0.255252	1.59e-17	-0.527
FLT4	2.32e-15	0.351945	1.27e-05	-0.085
FOXI2	1.41e-16	0.301647	7.04e-06	-0.078
GAS7	1.24e-20	0.465885	2.22e-22	-0.952
GATA2	7.45e-06	0.203863	1.55e-21	-1.147
GATA3	8.56e-06	0.286371	5.29e-07	-0.166
GDNF	3.45e-13	0.228682	0.0487413	-0.052
GIPC2	1.36e-10	0.253205	4.48e-05	-0.079
GJA5	5.06e-24	0.253816	8.92e-15	-0.674
GRIA1	2.73e-18	0.319363	0.00728532	-0.055
H2AFY	1.56e-20	0.210992	1.25e-11	-0.756
HBA1	1.87e-15	0.258296	4.01e-35	-3.807
HDC	3.62e-13	0.203212	2.28e-13	-1.11
HLF	6.6e-12	0.279135	1.15e-08	-0.609
HOXA2	2.39e-22	0.427352	2.02e-18	-0.523
HOXA4	4.28e-16	0.227003	5.91e-15	-0.589
HOXA5	2.66e-11	0.22602	6.66e-29	-2.09
HOXA7	2.39e-22	0.489338	0.0279447	-0.043
HOXB4	6.52e-20	0.596387	0.0106972	-0.161
HOXC11	3.91e-12	0.334319	0.00556806	-0.13
HOXD12	2.43e-24	0.382828	0.00062506	-0.188
HOXD9	7.02e-20	0.432851	0.0381807	-0.07
HPSE2	7.78e-22	0.241883	0.000591757	-0.049
HS3ST2	4.56e-18	0.324092	0.0251892	-0.355
HSPA2	1.01e-23	0.343182	0.0098163	-0.453
ICAM2	1.16e-12	0.207914	1.72e-20	-1.354
IFFO1	2.94e-23	0.231089	1.8e-13	-0.795
IGF1	2.84e-19	0.240383	2.15e-05	-0.253
IGSF21	6.17e-19	0.226864	0.00762212	-0.259
ITGA8	6.5e-17	0.249956	0.00012685	-0.55
JAM2	7.2e-15	0.236139	8.99e-46	-1.878
KCNA5	1.42e-21	0.339556	3.98e-17	-0.73
KLF14	9.25e-10	0.313246	0.019437	-0.038
LAMA2	3.43e-12	0.22748	6.29e-16	-0.717
LEFTY2	3.2e-23	0.221838	6.42e-17	-0.717
LIN7A	2.15e-13	0.21154	1.88e-17	-0.184
LRFN5	1.1e-19	0.287403	1.34e-13	-0.193
LRRC3	3.04e-10	0.218664	0.0098934	-0.084
LTC4S	1.46e-23	0.217191	2.37e-33	-1.77
MAGI2	1.15e-20	0.296618	9.64e-06	-0.085
MAL	6.63e-32	0.269081	4.01e-19	-1.951
MAMDC2	7.03e-14	0.206683	4.01e-35	-2.727
MCAM	2.09e-18	0.293198	6.22e-06	-0.139
MMP2	2.05e-13	0.218115	0.00127182	-0.186
NALCN	4.57e-13	0.239457	0.000299544	-0.06
NCALD	1.7e-18	0.223144	1.81e-08	-0.856
NDRG2	6.22e-24	0.253973	8.37e-30	-1.581
NOVA2	1.15e-13	0.284698	0.0340655	-0.062
NPR2	7.14e-21	0.313725	8.35e-12	-0.419
NPY5R	9.88e-17	0.275983	8.5e-06	-0.084
NRN1	2.51e-14	0.247577	4.75e-11	-0.26
NTM	6.49e-15	0.358795	0.00169438	-0.745
NTRK3	4.56e-18	0.327708	8.2e-07	-0.116
PCDHB15	1.1e-13	0.27228	0.0143235	-0.038
PDE4DIP	2.6e-22	0.317178	0.0240036	-0.116
PDE8B	1.08e-20	0.239046	1.21e-13	-0.982
PDZRN3	9.88e-15	0.242285	6.67e-13	-0.287
PENK	2.48e-13	0.238789	4.9e-10	-0.685
PGLYRP1	1.28e-25	0.355917	5.07e-10	-0.252
PODN	1.18e-19	0.262344	5.74e-06	-0.732
PRAC	4.12e-30	0.584251	0.0099932	-0.042
PRKCB	7.78e-22	0.428696	1.29e-13	-0.948
PRRT1	2.44e-15	0.230457	0.0037686	-0.084
PRX	2.59e-15	0.26442	1.85e-21	-1.111
PTGDR	9.95e-18	0.423695	5.11e-05	-0.119
RAB37	1.95e-14	0.308614	1.97e-05	-0.502
RASSF1	1.62e-05	0.209267	4.19e-20	-0.752
RCSD1	4.09e-21	0.202895	1.36e-07	-0.32
RFTN2	2.84e-20	0.201554	1.91e-21	-0.921
RHOJ	1.28e-14	0.210448	8.99e-46	-1.447
RUNX1T1	7.97e-16	0.220475	2.22e-06	-0.439
RUNX3	7.03e-14	0.442364	4.3e-06	-0.632
SCARA5	1.26e-11	0.21465	4.66e-34	-1.828
SCN2B	1.28e-14	0.205525	3.8e-17	-0.467
SCN4B	8.13e-23	0.248607	5.99e-24	-1.162
SFRP1	1.26e-19	0.386266	5.39e-11	-0.914
SHANK2	5.03e-26	0.21038	5.75e-06	-0.383
SLC15A3	6.64e-07	0.213025	5.94e-18	-1.43
SLC22A16	8.21e-12	0.258177	0.000407589	-0.146
SLC27A6	9.88e-15	0.222132	0.00498993	-0.076
SLC2A14	4.2e-31	0.41755	8.67e-11	-0.371
SMOC2	6.5e-17	0.205388	8.85e-05	-0.498
SNRPN	2.2e-15	0.220741	7.38e-12	-1.261
SOCS2	4.98e-09	0.3486	1.02e-22	-2.029
SOSTDC1	7.02e-20	0.293429	4.2e-28	-2.124
SOX1	2.41e-17	0.265405	0.0184355	-0.037
SOX17	9.45e-25	0.428235	1.17e-28	-1.14
SPAG6	2.28e-14	0.367536	7.02e-07	-0.831
SPARCL1	7.46e-27	0.301542	7.46e-35	-2.661
SPON1	4.49e-17	0.308898	1.88e-18	-1.458
STAT5A	1.7e-13	0.261338	1.38e-06	-0.498
SULT1C4	1.35e-23	0.2323	3.2e-14	-0.296
SYDE1	1.59e-23	0.278807	5.7e-10	-0.469
TAL1	3.37e-26	0.323555	1.64e-08	-0.167
TBX4	5.59e-24	0.357474	8.83e-18	-0.562
TBX5	6.87e-24	0.355209	0.0157048	-0.046
TCTEX1D1	3.2e-23	0.305186	4.83e-10	-0.332
TEK	9.18e-24	0.219537	1.97e-44	-2.714
TLL1	1.33e-13	0.215814	5.37e-09	-0.184
TM6SF1	9.7e-13	0.280796	8.27e-39	-1.14
TMEM204	1.06e-18	0.22498	1.17e-25	-1.54
TOX2	1.54e-12	0.22527	4.64e-27	-1.683
TUBB6	2.09e-20	0.512341	1.7e-18	-1.392
VSX2	2.19e-24	0.349585	0.0151064	-0.077
VWC2	1.11e-16	0.322183	0.00174539	-0.082
WFIKKN2	1.12e-10	0.264211	0.0158645	-0.053
WNT2	4.66e-14	0.226446	1.11e-24	-0.771
WT1	1.82e-18	0.286172	0.0216286	-0.088
ZEB2	1.31e-18	0.236406	2.37e-33	-1.097
ZNF177	1.82e-19	0.389149	0.0440255	-0.131
ZNF385D	1.77e-15	0.250869	0.00100983	-0.195
ZSCAN1	1.59e-16	0.279147	1.79e-17	-0.383

## Sheet: Hypo&Up
Supplemental Table 3. Sheet 2: Genes significantly hypomethylated and upregulated
	DNA methylation		Gene Expression
	Q-value	β-value difference	BH p-value	Fold change (log2)
ACMSD	9.39e-26	-0.226985	0.00177	0.15
AGR2	2.86e-29	-0.27452	4.75e-11	1.261
AIM2	1.58e-14	-0.299089	1.89e-10	1.18
AZGP1	7.09e-19	-0.263187	0.0485	0.494
BRDT	6.75e-16	-0.237991	0.000206	0.363
C10orf81	1.99e-24	-0.31374	0.000535	0.657
C20orf54	4.26e-18	-0.210006	6.92e-13	0.471
C2orf47	6.24e-25	-0.249057	0.0437	0.156
CFB	2.01e-12	-0.205441	3.03e-09	1.408
CP	4.66e-14	-0.211894	9.34e-09	0.849
CUEDC1	1.42e-21	-0.258472	1.55e-08	0.912
FAM83A	5.09e-25	-0.361296	8.82e-20	2.096
FGF6	2.96e-24	-0.220217	0.0346	0.041
FIGNL1	2.78e-09	-0.214445	6.8e-07	0.195
GRB7	1.1e-23	-0.212173	9.82e-23	1.161
HABP2	2.53e-27	-0.256652	2.42e-09	1.172
KRT8	2.73e-25	-0.236692	1.86e-26	1.946
KSR1	3.27e-10	-0.203204	0.000187	0.106
LAMB3	4.33e-22	-0.212508	1.08e-06	1.031
LGALS8	5.67e-25	-0.21703	0.0308	0.282
LRIT1	1.34e-20	-0.2244	0.0222	0.036
MEST	8.13e-20	-0.224305	3.97e-06	0.193
MX2	1.54e-21	-0.269065	2.37e-13	1.226
PDILT	1.87e-17	-0.24076	0.00873	0.037
PROM2	6.83e-27	-0.212832	1.14e-28	2.344
PRSS1	2.39e-14	-0.25318	0.00171	0.372
RAB25	5.57e-23	-0.223631	3.17e-19	1.12
RASSF6	2.96e-24	-0.227379	0.00458	0.108
RIT1	3.82e-16	-0.290069	0.00388	0.304
RPA3	5.02e-19	-0.209511	3.33e-05	0.481
RPH3AL	3.75e-18	-0.204949	0.00363	0.332
RUNX1	1.93e-12	-0.283733	1.25e-17	0.827
RUNX2	1.05e-13	-0.221075	0.000986	0.229
S100A14	2.67e-24	-0.263974	0.00739	0.421
S100A16	7.2e-15	-0.238539	1.26e-07	0.912
SDCBP2	6.17e-19	-0.24495	0.00937	0.488
SERPINB5	1.15e-20	-0.342141	0.00029	0.631
SFN	2.37e-26	-0.261009	2.67e-24	2.168
SLAMF7	5.18e-20	-0.220677	0.0249	0.141
SLC38A10	3.73e-25	-0.251451	4.82e-15	0.827
SLC7A11	4.26e-18	-0.220929	0.00218	0.173
SPDEF	3.26e-20	-0.206675	3.87e-19	1.945
SPRR2D	2.69e-23	-0.292506	0.021	0.369
TCL1B	9.24e-19	-0.236502	1.62e-09	0.301
TCN1	3.35e-25	-0.277085	2.63e-05	1.386
THNSL2	8.45e-16	-0.200346	8.52e-07	0.881
TM4SF4	1.68e-20	-0.207364	9.34e-06	1.379
TMC6	4.12e-30	-0.304496	1.19e-09	0.696
TMEM105	7.46e-27	-0.25827	6.29e-09	0.333
TMEM156	1.34e-27	-0.261242	0.015	0.097
TMEM177	2.45e-11	-0.271231	1.39e-29	0.788
TNFRSF10A	1.45e-25	-0.343675	1.04e-09	0.623
TRIM31	3.39e-15	-0.212753	2.15e-05	0.565
TTC15	2.89e-18	-0.204683	0.00651	0.192
XDH	6.87e-24	-0.318754	2.95e-15	0.73
ZMYND8	7.78e-22	-0.203252	1.42e-11	0.614
ZNF750	7.39e-14	-0.260249	3.69e-12	1.221

## Sheet: Hyper&Up
Supplemental Table 3. Sheet 3: Genes significantly hypermethylated and upregulated
	DNA methylation		Gene Expression
	Q-value	β-value difference	BH p-value	Fold change (log2)
ACOT11	2.26e-20	0.254385	1.22e-14	1.052
ACTN2	3.02e-16	0.318583	0.038	0.116
ADAM12	6.42e-10	0.248531	0.00402	0.06
ASCL2	3.29e-17	0.43493	0.0487	0.275
BHMT	6.66e-22	0.421282	0.0168	0.091
BNC1	2.67e-24	0.492778	0.0151	0.101
C12orf34	1.49e-28	0.430667	2.37e-07	0.205
CASP2	3.04e-10	0.250737	8.19e-11	0.413
CCDC140	4.32e-29	0.407617	0.00097	0.271
CDKN2A	2.73e-18	0.349179	3.14e-05	0.686
CELSR3	4e-15	0.205419	8.94e-20	1.56
CHAT	1.46e-17	0.204833	0.0103	0.069
CLIC6	0.0131748	0.258106	0.000607	0.895
CNTNAP2	1.02e-19	0.310351	0.00209	0.424
COL5A2	6.6e-21	0.292706	2.28e-13	1.429
COMP	1.11e-11	0.330612	2.13e-16	2.448
CSPG5	4.57e-24	0.256585	0.000132	0.267
DLK1	7.54e-19	0.384141	0.0326	0.315
DLX5	1.15e-20	0.309068	0.00157	0.295
DRD5	3.27e-19	0.307392	0.0297	0.033
EEF1A2	6.83e-15	0.231612	5.64e-14	2.901
FOXD2	2.09e-18	0.309246	4.58e-11	0.739
GABBR2	1.97e-15	0.216053	0.0017	0.322
GJB6	1.59e-16	0.230608	0.00832	0.134
GNG4	7.18e-18	0.437327	0.000373	0.463
GPC2	1.68e-11	0.24211	3.77e-06	0.197
GREM1	2.65e-19	0.383531	1.32e-11	0.855
GRIK2	1.6e-24	0.406514	0.00177	0.094
HIST1H1A	2.09e-20	0.227975	0.0235	0.053
HIST1H2AE	2.65e-14	0.223716	0.000309	0.175
HIST1H2BH	4.67e-12	0.243751	0.000108	0.128
HIST1H3D	4.71e-22	0.234343	0.000218	0.172
HIST1H3F	8.62e-14	0.274625	0.000512	0.124
HIST1H4E	5.52e-13	0.234337	4.49e-07	0.166
HIST1H4H	5.76e-17	0.205584	0.000125	0.46
HOXA13	2.86e-13	0.414647	0.00641	0.08
HOXB8	9.95e-18	0.372316	0.00844	0.323
HOXC9	1.05e-13	0.261735	2.19e-08	0.591
HOXD3	7.64e-24	0.33547	0.00297	0.176
HOXD4	2.73e-29	0.408392	0.0482	0.049
INA	6.22e-11	0.442562	0.00428	0.346
ISL1	6.11e-17	0.281091	0.000138	0.639
KRT86	2.09e-18	0.204604	1.08e-08	0.929
LHX2	8.74e-08	0.36976	0.0205	0.18
MSC	1.8e-20	0.361851	0.00275	0.184
NEFH	3.52e-23	0.287039	0.0138	0.306
NKX3-2	2.65e-26	0.339339	0.000121	0.328
NMBR	3.35e-25	0.294987	3.16e-10	0.143
NOX4	2.83e-27	0.379616	5.63e-08	0.608
NPTX2	6.34e-18	0.302055	0.00339	0.488
ONECUT2	5.44e-14	0.295929	0.000149	0.378
PAK2	7.33e-26	0.220896	0.000239	0.397
PAX7	1.68e-21	0.39322	0.000348	0.45
PAX9	3.55e-11	0.20663	0.00874	0.173
PCDH8	2.43e-23	0.307583	0.0312	0.07
PDE4C	5.97e-10	0.318823	1.74e-06	0.556
PHOX2A	2.43e-24	0.377381	0.0287	0.034
PKMYT1	9.31e-17	0.28501	9.09e-15	0.729
PLEKHA6	5.65e-21	0.355079	2.96e-07	0.613
POU4F1	5.65e-07	0.363736	0.000694	0.332
PPFIA2	1.58e-15	0.207584	0.0331	0.066
PTPRN	2.54e-16	0.247304	0.0291	0.093
RAX	2.23e-18	0.284137	0.0423	0.057
SCUBE3	7.76e-17	0.327995	0.000206	0.209
SLC4A11	1.03e-25	0.310935	2.2e-08	0.744
SLC8A2	1.21e-13	0.205181	0.0156	0.194
SMPD3	1.1e-21	0.331694	0.02	0.123
SOX11	1.33e-15	0.248916	0.00408	0.408
STMN2	8.81e-17	0.222672	0.0479	0.173
SULT4A1	1.1e-13	0.21992	0.00814	0.07
TDRD5	1.78e-13	0.201398	1.38e-06	0.172
THBS4	6.6e-21	0.215233	0.00424	0.438
TMEM171	5.32e-09	0.241832	0.00196	0.152
TMPRSS6	2.05e-13	0.204263	7.19e-08	0.864
TNFSF4	3.39e-15	0.213456	0.0186	0.151
UCHL1	2.2e-15	0.401428	0.00476	0.633
WDR8	1.54e-21	0.446362	6.32e-19	0.634
WDR86	4.8e-16	0.246041	3.33e-05	0.697
WNK2	1.67e-15	0.380226	0.00172	0.131
WRN	1.77e-15	0.208833	0.00499	0.195
ZNF48	9.64e-11	0.235395	0.0002	0.086
ZNF574	3.75e-18	0.25099	1.55e-08	0.296
ZNF667	3.53e-20	0.287667	0.0252	0.055

## Sheet: Hypo&Down
Supplemental Table 3. Sheet 4: Genes significantly hypomethylated and downregulated
	DNA methylation		Gene Expression
	Q-value	β-value difference	BH p-value	Fold change (log2)
BTNL2	4.12e-30	-0.305577	2.77e-07	-0.16
C1QB	2.13e-25	-0.26393	0.000100198	-0.505
C1orf116	2.23e-18	-0.277952	1.57e-08	-0.648
C1orf158	6.6e-21	-0.232927	8.53e-17	-1.662
C5orf23	2.44e-15	-0.227023	3.53e-11	-0.698
CASP8	1.98e-25	-0.34505	0.000407589	-0.143
CCL18	4.79e-20	-0.214461	8.33e-09	-1.007
CCL8	9.77e-12	-0.231883	0.00100228	-0.697
CD80	3.05e-20	-0.228752	0.0386104	-0.067
CDH13	4.11e-25	-0.260144	4.2e-24	-1.011
CLIC3	3.08e-28	-0.234765	1.21e-15	-1.754
CORO6	5.65e-21	-0.256184	0.00092402	-0.126
DEGS1	6.12e-29	-0.33316	5.91e-05	-0.403
DPP6	7.58e-30	-0.340873	7.95e-07	-0.285
EMR3	8.74e-18	-0.232426	1.54e-15	-0.484
EVI2B	6.65e-06	-0.206141	3.1e-24	-1.741
FAR2	5.51e-11	-0.208235	1.87e-21	-0.834
FGFBP2	6.75e-16	-0.208934	7.75e-22	-1.265
FTH1	6.88e-25	-0.230327	4.06e-05	-0.801
GK2	2.08e-15	-0.214377	0.0169421	-0.158
GNGT2	3.2e-23	-0.229104	1.09e-08	-0.357
HBB	2.12e-17	-0.203131	4.01e-39	-4.149
HK3	2.84e-22	-0.216836	2.66e-13	-0.998
HNMT	3.62e-16	-0.296552	4.82e-08	-0.591
IL18RAP	9.24e-19	-0.22647	3.18e-12	-0.761
IL20RA	8.92e-11	-0.215549	0.00018778	-0.3
KCNJ16	1.99e-17	-0.229056	3.17e-05	-0.357
KRT1	1.6e-18	-0.226721	1.15e-06	-0.21
LY86	8.67e-19	-0.200368	1.89e-18	-1.534
MS4A15	1.12e-26	-0.289689	2.42e-15	-1.448
MS4A2	3.35e-22	-0.210032	1.89e-32	-1.505
MYH4	6.09e-23	-0.232203	6.9e-13	-0.56
NAPSA	3.95e-22	-0.208803	0.00131745	-0.785
NID1	1.6e-24	-0.261769	0.0147796	-0.127
NTF3	1.35e-14	-0.20067	0.0245328	-0.134
PLCL1	9.46e-16	-0.292882	3.86e-18	-0.222
PTPN6	1.35e-23	-0.237122	0.000197587	-0.422
PUM2	6.38e-16	-0.26869	0.0487413	-0.168
RNASE3	1.16e-22	-0.286892	0.0017215	-0.071
SFTA2	1.65e-22	-0.201345	0.000567375	-0.779
SIRPB1	1.99e-17	-0.202056	0.00710113	-0.155
SIRPD	1.15e-20	-0.238576	8.39e-10	-0.123
TMEM116	9.88e-17	-0.2532	3.86e-06	-0.477
WDR16	6.9e-17	-0.211032	4.37e-10	-0.876
ZBED2	7.19e-22	-0.243411	4.28e-19	-1.391
ZMYND10	2.25e-10	-0.227864	1.08e-06	-0.787
