# Supplementary material for: Genome-scale analysis of DNA methylation in lung adenocarcinoma and integration with mRNA expression
Source: HighWire-hosted journal article supplement (doi:10.1101/gr.132662.111), 2012-05-21
Supplement: Selamat_Suppl_Table4.xlsx [file Selamat_Suppl_Table4.xlsx]

## Sheet: Hypermeth&Downreg
Supplemental Table 4. Sheet 1: Top hypermethylated and downregulated genes in lung adenocarcinoma
	DNA methylation		Gene Expression
Gene*	Q-value	β-value difference	BH p-value	Fold change (log2)
ABCA3	9.89655e-19	0.528095	9.52156e-20	-1.79414
TUBB6	2.09078e-20	0.512341	1.69983e-18	-1.392
SOX17	9.45037e-25	0.428235	1.16822e-28	-1.13975
CDO1	1.25699e-29	0.379865	5.71467e-34	-1.53513
SOCS2	4.97681e-09	0.3486	1.02196e-22	-2.02932
CYYR1	1.14868e-20	0.33649	7.87579e-42	-2.00541
DOCK2	3.52283e-18	0.334756	4.84505e-22	-1.38989
CSF3R	3.55192e-11	0.314312	4.29287e-15	-1.67798
SPON1	4.48687e-17	0.308898	1.88094e-18	-1.45761
SPARCL1	7.45891e-27	0.301542	7.45639e-35	-2.66069
SOSTDC1	7.0189e-20	0.293429	4.19784e-28	-2.1237
CDH13	1.37211e-17	0.28214	4.20043e-24	-1.01073
TM6SF1	9.70231e-13	0.280796	8.27126e-39	-1.13957
MAL	6.62527e-32	0.269081	4.01267e-19	-1.95134
C7	1.81907e-19	0.265162	1.74152e-24	-2.46632
PRX	2.58647e-15	0.26442	1.85248e-21	-1.11116
CLEC14A	2.68958e-16	0.263106	6.21264e-32	-2.34867
HBA1	1.86733e-15	0.258296	4.01346e-35	-3.80674
NDRG2	6.21866e-24	0.253973	8.37233e-30	-1.58118
ADCY4	7.65933e-13	0.252536	1.14649e-23	-1.32189
SCN4B	8.12923e-23	0.248607	5.98936e-24	-1.16204
EFCAB1	7.29773e-08	0.241034	8.74822e-11	-1.39349
EPB41L3	4.10666e-10	0.23988	2.30101e-15	-1.15392
ZEB2	1.3062e-18	0.236406	2.36577e-33	-1.09725
JAM2	7.19733e-15	0.236139	8.99248e-46	-1.87817
C1orf87	1.95116e-06	0.233347	8.77506e-12	-1.01955
HOXA5	2.66353e-11	0.22602	6.66174e-29	-2.08978
TOX2	1.53545e-12	0.22527	4.63664e-27	-1.68308
TMEM204	1.05804e-18	0.22498	1.16828e-25	-1.53991
SNRPN	2.19734e-15	0.220741	7.37797e-12	-1.26095
TEK	9.18403e-24	0.219537	1.97177e-44	-2.71429
ACVRL1	7.53879e-19	0.217074	1.22466e-33	-1.7179
SCARA5	1.25554e-11	0.21465	4.65591e-34	-1.82783
CLEC1A	4.26246e-18	0.21461	1.0192e-48	-1.60193
SLC15A3	6.63624e-07	0.213025	5.94379e-18	-1.43046
LTC4S	9.23866e-19	0.21293	2.36577e-33	-1.76986
CTNNAL1	8.76908e-09	0.211089	4.93894e-23	-1.51246
RHOJ	1.28469e-14	0.210448	8.99248e-46	-1.44745
CLDN5	6.66093e-22	0.20829	6.92451e-32	-2.58584
ICAM2	1.16254e-12	0.207914	1.72056e-20	-1.35369
ALDH1A2	1.54723e-11	0.207191	5.24061e-20	-1.71006
MAMDC2	7.02664e-14	0.206683	4.01346e-35	-2.7267
GATA2	7.44999e-06	0.203863	1.55282e-21	-1.14706
HDC	3.61631e-13	0.203212	2.27887e-13	-1.10951
EFEMP1	2.51461e-14	0.202222	2.7872e-24	-2.2544
* Genes ordered by decreasing β-value difference

## Sheet: Hypometh&Upreg
Supplemental Table 4. Sheet 2: Top hypomethylated and upregulated genes in lung adenocarcinoma
	DNA methylation		Gene Expression
Gene*	Q-value	β-value difference	BH p-value	Fold change (log2)
FAM83A	5.09189e-25	-0.361296	8.81939e-20	2.0956
AIM2	1.58103e-14	-0.299089	1.89005e-10	1.18026
TCN1	3.35124e-25	-0.277085	2.62967e-05	1.3861
AGR2	2.85978e-29	-0.27452	4.74917e-11	1.26134
MX2	1.5412e-21	-0.269065	2.36699e-13	1.22628
ZNF750	7.38752e-14	-0.260249	3.69319e-12	1.22109
HABP2	2.52534e-27	-0.256652	2.41911e-09	1.17223
KRT8	2.73271e-25	-0.236692	1.85972e-26	1.9459
SFN	1.78678e-29	-0.228824	2.66647e-24	2.16819
RAB25	5.57405e-23	-0.223631	3.17182e-19	1.11967
PROM2	6.8337e-27	-0.212832	1.14226e-28	2.34405
LAMB3	4.33058e-22	-0.212508	1.07675e-06	1.03066
GRB7	1.10412e-23	-0.212173	9.8241e-23	1.16124
TM4SF4	1.67947e-20	-0.207364	9.33893e-06	1.37922
SPDEF	3.26395e-20	-0.206675	3.87129e-19	1.94491
CFB	2.01448e-12	-0.205441	3.02782e-09	1.40777
* Genes ordered by decreasing β-value difference

## Sheet: Hypermeth&Upreg
Supplemental Table 4. Sheet 3: Top hypermethylated and upregulated genes in lung adenocarcinoma
	DNA methylation		Gene Expression
Gene*	Q-value	β-value difference	BH p-value	Fold change
COMP	1.10971e-11	0.330612	2.12641e-16	2.44836
COL5A2	6.59671e-21	0.292706	2.27887e-13	1.42887
ACOT11	2.25644e-20	0.254385	1.22157e-14	1.05158
EEF1A2	6.83425e-15	0.231612	5.63684e-14	2.90117
CELSR3	4.00468e-15	0.205419	8.93574e-20	1.5598
* Genes ordered by decreasing β-value difference

## Sheet: Hypometh&Downreg
Supplemental Table 4. Sheet 4: Top hypomethylated and downregulated genes in lung adenocarcinoma
	DNA methylation		Gene Expression
Genes*	Q-value	β-value difference	BH p-value	Fold change
MS4A15	1.11778e-26	-0.289689	2.42147e-15	-1.44815
ZBED2	7.18531e-22	-0.243411	4.28089e-19	-1.3912
CLIC3	3.07744e-28	-0.234765	1.21293e-15	-1.75354
C1QB	6.59671e-21	-0.232927	8.5309e-17	-1.66183
CCL18	4.78532e-20	-0.214461	8.32838e-09	-1.00676
MS4A2	3.34724e-22	-0.210032	1.88596e-32	-1.50471
FGFBP2	6.75118e-16	-0.208934	7.75319e-22	-1.26501
EVI2B	6.65187e-06	-0.206141	3.09681e-24	-1.74127
HBB	2.12317e-17	-0.203131	4.01168e-39	-4.14887
LY86	8.67229e-19	-0.200368	1.89394e-18	-1.53441
* Genes ordered by decreasing β-value difference
