# Supplementary material for: Genome-scale analysis of DNA methylation in lung adenocarcinoma and integration with mRNA expression
Source: HighWire-hosted journal article supplement (doi:10.1101/gr.132662.111), 2012-05-21
Supplement: Selamat_Suppl_Table5.xlsx [file Selamat_Suppl_Table5.xlsx]

## Sheet: Sheet1
Supplemental Table 5: Genes differentially methylated in current and never-smoker tumors
	DNA methylation		Gene Expression
Gene*	Q-value	β-value difference	p-value	Fold change (log2)
IRF8	0.01775	0.346724	0.0639712	0.766467
IHH	0.045689	0.283301	0.555489	0.938434
LGALS4	0.020097	0.217821	0.00939581	0.357476
IL18BP	0.045689	0.213995	0.111067	0.784606
VTN	0.032315	0.204204	0.888162	1.00591
KLF11	0.045689	-0.269703	0.370182	1.11726
*Genes are sorted by decreasing β-value difference (median β-value in current smoker tumors
– median β-value in never-smoker tumors).
