# Supplementary material for: Genome-scale analysis of DNA methylation in lung adenocarcinoma and integration with mRNA expression
Source: HighWire-hosted journal article supplement (doi:10.1101/gr.132662.111), 2012-05-21
Supplement: Selamat_Suppl_Table6.xlsx [file Selamat_Suppl_Table6.xlsx]

## Sheet: Sheet1
Supplemetal Table 6. Genes previously reported to be differentially methylated in smokers
Probe Name*	Gene Name	Wilcoxon Rank p-value	β-value difference
cg09099744	CDKN2A	0.0154659	0.264327
cg25156443	SFRP5	0.00435946	0.139911
cg13398291	SFRP1	0.0423516	0.128812
cg13759328	CDH13	0.0129761	0.124669
cg12128839	HOXA5	0.00288353	0.123255
cg10210238	CDKN2B	0.0407963	0.121783
cg07694025	SFRP2	0.0337167	0.110561
cg27196745	PTPRO	0.0208239	0.0940575
cg17482740	DNMT3B	0.0277003	0.0777721
cg08331313	SPARC	0.016859	0.0573661
cg17129141	MSH2	0.0378284	-0.0063932
cg15043975	RASSF1	0.00355354	-0.00888092
cg22215728	FHIT	0.0141737	-0.0343314
cg08797471	DAPK1	0.0364135	-0.0465044
* Ordered by decreasing β-value difference
