# Supplementary material for: Genome-scale analysis of DNA methylation in lung adenocarcinoma and integration with mRNA expression
Source: HighWire-hosted journal article supplement (doi:10.1101/gr.132662.111), 2012-05-21
Supplement: Selamat_Suppl_Table7.xlsx [file Selamat_Suppl_Table7.xlsx]

## Sheet: Sheet1
Supplemental Table 7. Probes differentially methylated between Cluster 1 and 2
Infinium Probe Name*	Gene Name	Wilcoxon Rank p-value	Q-value	β-value difference
cg04034767	GRASP	1.3619e-08	4.39e-07	0.662621
cg07017374	FLT3	3.48592e-08	6.79746e-07	0.645097
cg17872757	FLI1	1.24851e-06	6.9682e-06	0.597404
cg11126134	C13orf33	6.48948e-06	2.30856e-05	0.595415
cg22029275	FAM123A	3.48592e-08	6.79746e-07	0.585348
cg24446548	TWIST1	6.30305e-08	1.00561e-06	0.571126
cg08056146	SOX7	2.50041e-07	2.23127e-06	0.56496
cg06377278	RUNX3	2.47278e-06	1.15554e-05	0.561011
cg18815943	FOXE3	6.14331e-10	9.70324e-08	0.556763
cg18630040	PLA2G7	0.00020055	0.00032389	0.555314
cg19332710	RIMS4	4.95578e-09	2.79555e-07	0.551717
cg07080358	CNRIP1	2.19671e-08	5.42135e-07	0.551535
cg04532952	CA4	3.68568e-07	3.00075e-06	0.546893
cg25583174	FGF2	5.26799e-06	2.03939e-05	0.534358
cg08186362	HRH3	1.87665e-08	5.11058e-07	0.528841
cg09516965	PTGDR	6.3038e-05	0.000132403	0.528211
cg08108311	WNK4	4.74562e-07	3.56934e-06	0.524709
cg17108819	CD8A	2.50041e-07	2.23127e-06	0.520188
cg20357628	PHACTR3	8.39688e-08	1.2057e-06	0.517977
cg02126753	AEBP1	1.03689e-10	5.1957e-08	0.513904
cg13562911	ELOVL2	1.11035e-06	6.44772e-06	0.511646
cg12998491	FAM78A	6.08279e-07	4.25117e-06	0.504769
cg00290506	CNIH3	4.74562e-07	3.56934e-06	0.499692
cg20530314	AGTR1	4.74057e-06	1.87191e-05	0.497127
cg20209009	TBX21	8.75547e-07	5.59882e-06	0.493387
cg03168582	DMRT1	9.75457e-06	3.16369e-05	0.491371
cg12251804	C10orf125	1.07801e-05	3.41221e-05	0.49133
cg10918202	BAALC	0.000937199	0.00109651	0.491239
cg12422450	CHGA	3.08257e-06	1.36002e-05	0.489662
cg12686016	HOXA1	8.87599e-05	0.000171387	0.489071
cg24826867	IRF8	3.68568e-07	3.00075e-06	0.486741
cg23422659	WNT9B	3.43718e-06	1.46333e-05	0.483902
cg20415809	ITGA4	5.7782e-05	0.000124002	0.482882
cg26195812	DPYSL5	3.08257e-06	1.36002e-05	0.481595
cg13921352	FAM19A4	1.57389e-06	8.3984e-06	0.480201
cg09009111	EMILIN2	0.000185312	0.000306169	0.475208
cg25971347	FOXF1	8.29486e-09	3.7433e-07	0.474073
cg26646370	SHD	3.08257e-06	1.36002e-05	0.472531
cg11657808	RYR2	5.26799e-06	2.03939e-05	0.472182
cg10883303	HOXA13	2.99379e-08	6.47757e-07	0.469446
cg09053680	UTF1	1.46466e-07	1.65243e-06	0.469136
cg24662718	VAV3	0.000370278	0.000523587	0.467413
cg22036988	SPSB4	0.00107356	0.00121728	0.465756
cg26656135	EYA4	1.40248e-06	7.69161e-06	0.463568
cg25094569	WT1	1.3619e-08	4.39e-07	0.463372
cg22571530	NFASC	7.28041e-08	1.1057e-06	0.462858
cg00243313	IRX4	7.19397e-06	2.48638e-05	0.458829
cg03238797	ADAMTS18	0.000134358	0.000235796	0.458563
cg23559331	KCNH4	1.75744e-05	4.93921e-05	0.45798
cg20339230	ST8SIA2	5.44847e-08	9.2535e-07	0.454802
cg22594309	SYT2	0.00131177	0.00143385	0.453502
cg07109287	LHX2	8.87599e-05	0.000171387	0.451095
cg21351994	EMX1	1.46466e-07	1.65243e-06	0.450297
cg17740399	PDX1	0.00337162	0.00308898	0.448298
cg10362591	SLC6A2	2.81481e-05	7.07951e-05	0.448053
cg11248413	NEUROG1	8.75547e-07	5.59882e-06	0.447695
cg13297865	ELOVL4	0.000318638	0.000466866	0.446343
cg14409941	ADAMTS2	1.57389e-06	8.3984e-06	0.445679
cg26365854	ALX4	4.98866e-10	9.70324e-08	0.445025
cg08185661	SYT9	1.31364e-05	3.95967e-05	0.444128
cg12832649	SPOCK1	1.15677e-08	4.06022e-07	0.443613
cg21359747	ALDH1A3	8.87599e-05	0.000171387	0.442341
cg13694867	SIM2	1.24851e-06	6.9682e-06	0.442113
cg04988423	ALX4	2.19671e-08	5.42135e-07	0.441968
cg19018097	SNX32	0.000710321	0.000873783	0.441782
cg13562542	GPR27	0.000318638	0.000466866	0.441074
cg18794577	GRIN3A	0.000134358	0.000235796	0.440797
cg08211091	NAT8L	2.19671e-08	5.42135e-07	0.440014
cg07271264	MYOD1	2.99379e-08	6.47757e-07	0.439472
cg09229912	CUX2	2.50041e-07	2.23127e-06	0.438766
cg12373771	CECR6	1.67745e-07	1.82724e-06	0.437258
cg12300353	KCTD8	6.3038e-05	0.000132403	0.437082
cg22737001	RUNX3	1.19045e-05	3.64397e-05	0.436866
cg14174099	SLC8A3	4.26241e-06	1.73515e-05	0.435428
cg22341104	GFI1	3.43718e-06	1.46333e-05	0.435248
cg12748258	HR	1.24851e-06	6.9682e-06	0.434104
cg26599006	GSC2	3.24244e-07	2.75342e-06	0.432862
cg06954481	GBX2	0.00264539	0.00256812	0.432837
cg06905514	CAMK2B	1.76456e-06	9.16807e-06	0.432663
cg21530890	SOX8	1.87665e-08	5.11058e-07	0.430342
cg00090147	GATA4	9.67028e-08	1.27283e-06	0.427933
cg07903918	GABBR2	6.08279e-07	4.25117e-06	0.427212
cg24924779	KCNG1	5.84929e-06	2.17384e-05	0.426536
cg09191327	PRDM12	2.19671e-08	5.42135e-07	0.425481
cg06291867	HTR7	3.79172e-11	2.99447e-08	0.422477
cg20895877	PRIMA1	1.1121e-07	1.41656e-06	0.422104
cg20256494	CABP7	1.6002e-08	4.68052e-07	0.421892
cg09551147	SORCS3	3.43718e-06	1.46333e-05	0.421651
cg03777459	GATA5	1.91864e-07	1.96783e-06	0.420679
cg16652063	SLC13A5	5.37577e-07	3.89492e-06	0.419566
cg04528819	KLF14	0.000343576	0.000495138	0.419544
cg08768421	GDA	0.000875061	0.00103609	0.417298
cg18338311	TMEM132E	3.70404e-05	8.74508e-05	0.416458
cg26850754	CD8B	6.30305e-08	1.00561e-06	0.41616
cg14312526	FOXL2	2.76213e-06	1.25366e-05	0.415902
cg11428724	PAX7	0.00298893	0.00283031	0.414715
cg05028467	SNCB	1.11035e-06	6.44772e-06	0.413292
cg24891133	C13orf33	0.000710321	0.000873783	0.412739
cg21309147	STAC2	7.96867e-06	2.70674e-05	0.411786
cg19358442	ALX4	1.3619e-08	4.39e-07	0.410083
cg08555612	PROK2	1.91864e-07	1.96783e-06	0.410063
cg15817236	ALX4	3.24244e-07	2.75342e-06	0.408638
cg16924616	DLX5	1.07801e-05	3.41221e-05	0.408253
cg05647859	LIN7A	1.97646e-06	9.97376e-06	0.408195
cg01805540	CACNB2	0.00107356	0.00121728	0.404963
cg18454685	CACNA1G	2.50041e-07	2.23127e-06	0.404571
cg22709192	HOXC11	8.39688e-08	1.2057e-06	0.40443
cg02748539	SLC9A3	1.3668e-09	1.54203e-07	0.404257
cg02452985	BCL11B	8.87599e-05	0.000171387	0.403997
cg08097882	POU4F1	0.0035788	0.00325239	0.402793
cg09357097	HOXB7	0.000937199	0.00109651	0.402288
cg19210770	ACCN4	5.84929e-06	2.17384e-05	0.397745
cg03425110	NEUROG3	4.18463e-07	3.30477e-06	0.397663
cg23898073	GFRA1	9.86487e-07	5.99283e-06	0.396789
cg27049761	B3GNT4	3.82925e-06	1.59584e-05	0.39617
cg24834740	PPP1R16B	2.50041e-07	2.23127e-06	0.396043
cg16761581	ADCY4	0.00507625	0.00432462	0.395491
cg25228126	FZD2	0.000145725	0.000252656	0.395279
cg18438777	NPY5R	1.27713e-07	1.53985e-06	0.394997
cg01086895	DCHS1	3.47476e-09	2.49469e-07	0.394606
cg03663715	FOXD1	5.84929e-06	2.17384e-05	0.394276
cg20723355	FBXO39	1.3619e-08	4.39e-07	0.393581
cg01231779	NID2	3.08257e-06	1.36002e-05	0.393526
cg09649610	GNG4	4.70247e-08	8.25273e-07	0.393108
cg16994506	CCND2	8.15552e-05	0.000162851	0.392997
cg17471928	STAC2	3.43718e-06	1.46333e-05	0.392497
cg20286200	EYA4	6.48948e-06	2.30856e-05	0.392304
cg07965823	ISM2	0.000114023	0.000208687	0.391081
cg01192900	BTG4	2.81481e-05	7.07951e-05	0.390441
cg17190608	CUX2	1.76456e-06	9.16807e-06	0.389171
cg26516759	BMP7	7.96867e-06	2.70674e-05	0.388662
cg02613386	FBXO39	6.30305e-08	1.00561e-06	0.3886
cg16778809	ADAM23	0.000661994	0.000829847	0.387587
cg08047907	C1orf114	2.19671e-08	5.42135e-07	0.387181
cg22359606	NEUROD1	3.48592e-08	6.79746e-07	0.386945
cg01405761	CLVS1	9.86487e-07	5.99283e-06	0.386761
cg19586576	GJC1	1.97646e-06	9.97376e-06	0.386724
cg07447922	EPHA10	8.39688e-08	1.2057e-06	0.386667
cg21458907	CADPS	5.26799e-06	2.03939e-05	0.38586
cg03382304	JAM2	4.74057e-06	1.87191e-05	0.385854
cg18349835	VIPR2	0.000123809	0.000221967	0.385296
cg22750254	CCDC3	0.000253386	0.000389696	0.384002
cg21289015	USH1C	0.000134358	0.000235796	0.383657
cg25935911	DBC1	2.81481e-05	7.07951e-05	0.382972
cg04970352	ALX4	0.00149595	0.00160409	0.382151
cg17897879	TNFRSF8	6.87532e-07	4.70105e-06	0.380927
cg02136132	KCNK13	2.47278e-06	1.15554e-05	0.38014
cg25519930	CACNA1C	2.84908e-07	2.45905e-06	0.379547
cg13191049	SYNM	0.00537347	0.00452414	0.377953
cg08434234	DGKI	3.43718e-06	1.46333e-05	0.377444
cg03963198	IRX4	4.70247e-08	8.25273e-07	0.377389
cg11389172	SLC18A3	1.6002e-08	4.68052e-07	0.376016
cg24653181	RHCG	0.00317515	0.002964	0.375588
cg12382902	CCND2	3.08658e-05	7.61749e-05	0.375054
cg02244695	TMEM176A	0.000534337	0.000699233	0.375012
cg13958426	C1orf114	2.00155e-09	1.85966e-07	0.374217
cg22633722	CBS	1.11035e-06	6.44772e-06	0.374061
cg12265829	ADCY4	0.00317515	0.002964	0.371918
cg10189695	GPR78	2.50041e-07	2.23127e-06	0.371502
cg19355190	EGR2	4.84582e-05	0.000107801	0.371016
cg23984434	GUCY1A2	0.000616664	0.000782965	0.370456
cg17923358	RELN	4.05369e-05	9.40194e-05	0.370357
cg02409351	ALX1	9.22281e-10	1.32429e-07	0.36966
cg15784332	COMP	6.08279e-07	4.25117e-06	0.369277
cg09872233	ALOX15	6.30305e-08	1.00561e-06	0.369017
cg25057743	PTH2R	9.80597e-09	3.87208e-07	0.36883
cg03538436	NOS1	1.76456e-06	9.16807e-06	0.36829
cg12893143	UNC5A	1.44852e-05	4.24472e-05	0.36807
cg01775414	PHF21B	4.74562e-07	3.56934e-06	0.367977
cg07123069	HOXC11	4.84582e-05	0.000107801	0.367629
cg15796941	BTBD11	0.000253386	0.000389696	0.367612
cg05899618	GDF7	2.41204e-09	2.00514e-07	0.367307
cg19884262	FOXI2	4.4335e-05	0.000100181	0.367249
cg08853659	CLSTN2	0.0035788	0.00325239	0.36668
cg17410236	FLRT2	0.0120646	0.00895482	0.366645
cg12539975	PRDM12	5.37577e-07	3.89492e-06	0.366442
cg06995715	FOXL1	2.76213e-06	1.25366e-05	0.365567
cg14070647	RSPO2	8.87599e-05	0.000171387	0.365554
cg26344532	PDX1	0.00131177	0.00143385	0.364373
cg09416313	MATK	5.8972e-09	3.10484e-07	0.364211
cg06230736	GATA3	3.70404e-05	8.74508e-05	0.363454
cg20640433	LAMA2	4.4335e-05	0.000100181	0.362946
cg03718539	ETNK2	8.87599e-05	0.000171387	0.362413
cg21475402	BCAN	0.000145725	0.000252656	0.362215
cg16652259	DLX1	0.00183312	0.00191874	0.362164
cg13206017	SST	1.31364e-05	3.95967e-05	0.361925
cg21965997	CALY	6.30305e-08	1.00561e-06	0.361032
cg08441170	MYO3A	0.0691022	0.0382832	0.360657
cg26721264	GALR1	1.59609e-05	4.58362e-05	0.360424
cg20300246	LHX3	9.75457e-06	3.16369e-05	0.360282
cg06357925	PTPRO	3.48592e-08	6.79746e-07	0.359694
cg07480567	HS3ST3A1	0.00402736	0.00357166	0.35917
cg15337897	FGF3	1.75744e-05	4.93921e-05	0.359121
cg05368341	SYT6	2.00155e-09	1.85966e-07	0.359086
cg25084878	FBN2	0.00020055	0.00032389	0.358849
cg03127334	ERG	0.000534337	0.000699233	0.35841
cg11191210	VGLL2	8.8199e-06	2.92052e-05	0.3581
cg20979799	RFX6	0.000574164	0.000740916	0.358063
cg00888007	CCND2	8.39688e-08	1.2057e-06	0.356933
cg24176563	EYA4	3.82925e-06	1.59584e-05	0.355608
cg25302419	CTNND2	0.000497032	0.000661375	0.355358
cg14973995	MFSD10	0.0482051	0.0283889	0.355173
cg22231902	EN1	3.43718e-06	1.46333e-05	0.355019
cg01468621	BRSK2	3.68568e-07	3.00075e-06	0.35479
cg04897683	NEUROG1	4.74562e-07	3.56934e-06	0.354752
cg16098981	TMEM90B	2.47278e-06	1.15554e-05	0.354716
cg01920829	CDK5R2	1.46466e-07	1.65243e-06	0.354522
cg01322134	WNT3A	1.57389e-06	8.3984e-06	0.354306
cg13818573	C1QL1	8.8199e-06	2.92052e-05	0.354227
cg11438428	PTF1A	2.61027e-10	8.24574e-08	0.353534
cg01009664	TRH	4.26241e-06	1.73515e-05	0.353222
cg19006008	F2RL3	0.000157966	0.000270318	0.353147
cg06005396	HCN2	8.8199e-06	2.92052e-05	0.353117
cg04005707	CWH43	8.75547e-07	5.59882e-06	0.352585
cg25014318	GLP1R	2.33623e-05	6.15005e-05	0.35249
cg23239444	PACSIN1	8.15552e-05	0.000162851	0.350344
cg22946150	SH3GL3	2.81481e-05	7.07951e-05	0.349827
cg00263760	VAX1	0.000253386	0.000389696	0.349476
cg08132931	ADD2	1.59609e-05	4.58362e-05	0.348851
cg24496666	GIPC2	3.08658e-05	7.61749e-05	0.348671
cg04603031	CHRNA3	0.00017114	0.000286652	0.348416
cg19224837	GSC	3.08658e-05	7.61749e-05	0.348097
cg05675373	KCNC4	3.70404e-05	8.74508e-05	0.347927
cg05522383	PITX2	0.00750014	0.00596191	0.347495
cg15443822	ATP2A3	1.75744e-05	4.93921e-05	0.346853
cg05589246	HOXC12	1.6002e-08	4.68052e-07	0.346579
cg00273068	EMILIN3	1.6002e-08	4.68052e-07	0.345763
cg08190291	ADAMTS5	1.67745e-07	1.82724e-06	0.34559
cg10541755	EIF5A2	0.00219589	0.00221338	0.345152
cg00848728	DAB1	3.08658e-05	7.61749e-05	0.344254
cg16257091	BDNF	1.97646e-06	9.97376e-06	0.343083
cg08575537	EPO	4.95578e-09	2.79555e-07	0.342916
cg21842478	HOXB13	3.08257e-06	1.36002e-05	0.342543
cg10059959	PAX5	1.15677e-08	4.06022e-07	0.342193
cg25908985	IHH	3.25249e-10	8.56208e-08	0.341885
cg04884908	CYP26B1	1.91864e-07	1.96783e-06	0.341586
cg05421688	FAM163A	2.19167e-07	2.1108e-06	0.340466
cg04448487	GDAP1L1	0.00337162	0.00308898	0.340361
cg17834752	KCNK9	0.000253386	0.000389696	0.340122
cg23855989	AQP5	0.0207517	0.0139953	0.340069
cg25905812	DMRT1	1.19045e-05	3.64397e-05	0.340015
cg14419187	UNC80	7.28041e-08	1.1057e-06	0.340003
cg18221862	TMEFF2	4.05204e-08	7.52955e-07	0.33992
cg19917856	NCCRP1	0.00010495	0.00019525	0.339728
cg01643580	KCNK3	1.12459e-09	1.48022e-07	0.339388
cg26267310	HSD17B14	0.0286915	0.0184368	0.339036
cg10293925	AMPH	0.000216923	0.000343657	0.338809
cg02899772	NECAB2	1.44852e-05	4.24472e-05	0.33875
cg19774122	LAMA2	0.000295359	0.000439692	0.33866
cg06817264	CTSF	5.26799e-06	2.03939e-05	0.338442
cg11847808	EPHA8	5.44847e-08	9.2535e-07	0.33817
cg08914623	ALX4	0.000157966	0.000270318	0.337527
cg10140638	PTPRN	9.75457e-06	3.16369e-05	0.337052
cg14116122	ALX1	3.47476e-09	2.49469e-07	0.337043
cg27601582	ITGB1BP3	5.84929e-06	2.17384e-05	0.336996
cg01870826	LOC389458	0.0147657	0.0105244	0.336965
cg19831575	FGF4	1.1121e-07	1.41656e-06	0.336097
cg04270799	KIF5A	8.29486e-09	3.7433e-07	0.336084
cg22619018	CSMD1	0.00114823	0.00128808	0.336029
cg26057752	PGAM2	2.99379e-08	6.47757e-07	0.335938
cg18267374	NEFM	0.0114604	0.00857482	0.335752
cg00489401	FLT4	9.86487e-07	5.99283e-06	0.335589
cg17880199	MYH11	1.40248e-06	7.69161e-06	0.335429
cg15843823	ALOX15	9.86487e-07	5.99283e-06	0.334829
cg26045434	HR	8.15552e-05	0.000162851	0.334703
cg12388309	PAK7	0.00379721	0.00340194	0.334151
cg10453365	RHCG	4.4335e-05	0.000100181	0.333429
cg19528976	C7orf52	1.1121e-07	1.41656e-06	0.332894
cg14696396	TM6SF1	1.19045e-05	3.64397e-05	0.332785
cg12277666	TDRD5	0.00248719	0.00244764	0.332596
cg01234133	COL1A1	0.0390467	0.0239045	0.332528
cg23054883	FZD10	0.00020055	0.00032389	0.331744
cg07773116	GDF10	2.47278e-06	1.15554e-05	0.331383
cg09495977	HTRA3	3.43718e-06	1.46333e-05	0.331378
cg20881910	NTM	0.002062	0.00210802	0.331048
cg19764418	RYR2	5.84929e-06	2.17384e-05	0.331034
cg16787600	SORCS3	2.12621e-05	5.73089e-05	0.329428
cg16302441	POMC	1.11035e-06	6.44772e-06	0.329099
cg23316360	EDNRB	0.000134358	0.000235796	0.328669
cg04265576	HOXA6	7.19397e-06	2.48638e-05	0.327843
cg06277657	DGKI	1.24851e-06	6.9682e-06	0.327691
cg19965810	KCNH7	1.67745e-07	1.82724e-06	0.327417
cg05768141	KCNJ10	1.19045e-05	3.64397e-05	0.326754
cg01401376	EYA4	2.19167e-07	2.1108e-06	0.326614
cg12331389	RBP4	0.000134358	0.000235796	0.326336
cg20134215	MCHR2	3.43718e-06	1.46333e-05	0.326233
cg06856528	TMEFF2	2.19167e-07	2.1108e-06	0.3259
cg02196655	NOL10	0.000398855	0.000552617	0.325873
cg26164310	LPPR4	6.48948e-06	2.30856e-05	0.325793
cg27196745	PTPRO	4.18463e-07	3.30477e-06	0.325563
cg19286604	MGC39545	1.67745e-07	1.82724e-06	0.32523
cg04478795	SMO	0.000370278	0.000523587	0.324935
cg20025656	ACTA1	2.50041e-07	2.23127e-06	0.324804
cg15457899	SCN3B	2.19167e-07	2.1108e-06	0.324713
cg11631518	KCNC2	5.84929e-06	2.17384e-05	0.324066
cg07442479	GDNF	2.47278e-06	1.15554e-05	0.322989
cg24127874	HES6	0.0103301	0.00787843	0.322812
cg02620013	MLNR	4.74057e-06	1.87191e-05	0.322618
cg00654814	MGAT5B	5.37577e-07	3.89492e-06	0.322342
cg12128017	EPHA10	0.000429424	0.000584712	0.322225
cg12420104	DMRT3	0.00317515	0.002964	0.322052
cg04434339	ST6GAL2	0.000937199	0.00109651	0.321775
cg18671950	FBN1	0.0126963	0.00933157	0.320451
cg15749748	GATA5	8.39688e-08	1.2057e-06	0.320234
cg26220350	PLTP	0.000134358	0.000235796	0.320228
cg25823578	PTGER2	0.00010495	0.00019525	0.320208
cg26607785	TBX21	7.19397e-06	2.48638e-05	0.319727
cg09985279	MT1G	2.99379e-08	6.47757e-07	0.319557
cg16530429	LIN28	2.56525e-05	6.59896e-05	0.319465
cg19591881	CD34	9.80597e-09	3.87208e-07	0.319201
cg15613048	KIF17	0.000616664	0.000782965	0.318912
cg10605520	HRH3	2.12621e-05	5.73089e-05	0.318871
cg15604467	POU4F1	0.000370278	0.000523587	0.318279
cg01837719	FUT9	0.000295359	0.000439692	0.31791
cg04784672	LRFN5	1.76456e-06	9.16807e-06	0.317355
cg20404387	FAM43B	1.40248e-06	7.69161e-06	0.317163
cg01424107	CDX2	1.76456e-06	9.16807e-06	0.317135
cg00888479	SLC24A3	5.7782e-05	0.000124002	0.316617
cg27320127	KCNK12	2.56525e-05	6.59896e-05	0.316341
cg15309006	CHP2	2.84908e-07	2.45905e-06	0.315923
cg23922454	LHX5	1.75744e-05	4.93921e-05	0.315687
cg18055007	DDAH2	0.0614509	0.034714	0.315276
cg20792294	IGF2AS	6.48948e-06	2.30856e-05	0.314984
cg03943081	TCERG1L	1.44852e-05	4.24472e-05	0.314709
cg19461644	COL15A1	4.26241e-06	1.73515e-05	0.31469
cg23040064	JPH3	5.29316e-05	0.000115476	0.314466
cg01705587	SV2A	0.000318638	0.000466866	0.313788
cg23887396	SARM1	5.7782e-05	0.000124002	0.313075
cg15107670	WT1	1.24851e-06	6.9682e-06	0.312807
cg17619823	ADRB3	2.50041e-07	2.23127e-06	0.312591
cg22040627	SLC13A5	5.84929e-06	2.17384e-05	0.311444
cg03414321	HCK	2.00155e-09	1.85966e-07	0.31133
cg14614211	MKX	2.76213e-06	1.25366e-05	0.310647
cg25766046	ROR2	9.86487e-07	5.99283e-06	0.31015
cg16254309	CNTNAP2	4.4335e-05	0.000100181	0.310083
cg03294619	NKX2-5	8.39688e-08	1.2057e-06	0.309963
cg13547644	ACTA1	1.11035e-06	6.44772e-06	0.309957
cg27603796	CTTNBP2	9.65443e-05	0.000183944	0.309535
cg10298815	GPR88	4.05204e-08	7.52955e-07	0.309139
cg03870261	TIMM13	4.05369e-05	9.40194e-05	0.309082
cg11979959	SULF2	3.68568e-07	3.00075e-06	0.308766
cg24417499	HPCA	2.56677e-08	5.8756e-07	0.308678
cg17886028	CCND2	1.59609e-05	4.58362e-05	0.308516
cg20083676	S1PR3	0.000398855	0.000552617	0.308293
cg06638451	FAM107A	8.15552e-05	0.000162851	0.308277
cg03700462	HOXA1	0.000123809	0.000221967	0.308196
cg06940792	MEGF10	4.15457e-09	2.7342e-07	0.308184
cg04619381	PRR15	0.000616664	0.000782965	0.307981
cg24645221	PENK	3.43718e-06	1.46333e-05	0.307788
cg01293647	NEUROD2	8.29486e-09	3.7433e-07	0.307681
cg19777470	CRABP1	1.75744e-05	4.93921e-05	0.307563
cg17671157	KCNK10	3.48592e-08	6.79746e-07	0.307524
cg15835825	HTR5A	1.76456e-06	9.16807e-06	0.307337
cg26205131	SLC6A3	2.19167e-07	2.1108e-06	0.307298
cg11200929	CRABP1	5.26799e-06	2.03939e-05	0.306559
cg22334665	SLC22A16	2.47278e-06	1.15554e-05	0.306487
cg21688264	SNAP91	0.00131177	0.00143385	0.306371
cg16232126	SLC5A7	6.48948e-06	2.30856e-05	0.306076
cg14785479	SCARF2	0.000273639	0.000415186	0.30598
cg03064067	SLC6A15	1.57389e-06	8.3984e-06	0.305751
cg00970325	PAQR9	2.19167e-07	2.1108e-06	0.305326
cg25141720	GAS1	1.6002e-08	4.68052e-07	0.305268
cg27239157	MCF2L2	6.14331e-10	9.70324e-08	0.305213
cg17183546	D4S234E	4.95578e-09	2.79555e-07	0.304866
cg15239123	SMOC1	0.002062	0.00210802	0.304733
cg06151165	VSX1	2.21176e-06	1.06833e-05	0.304633
cg17503456	FOXL2	0.000234509	0.000367098	0.304388
cg00687686	NDRG4	5.37577e-07	3.89492e-06	0.304348
cg08460435	C1orf59	0.0250212	0.0164463	0.304011
cg11323198	CDH8	0.00402736	0.00357166	0.303828
cg06638433	IGF2BP1	5.26799e-06	2.03939e-05	0.303792
cg25361106	TLX2	0.00131177	0.00143385	0.303441
cg12741420	IRF4	1.91864e-07	1.96783e-06	0.303192
cg07103493	SLC27A6	0.000157966	0.000270318	0.302838
cg09851465	C1orf87	0.00337162	0.00308898	0.302777
cg07295678	DPYSL4	6.48948e-06	2.30856e-05	0.302697
cg09306675	EYA2	2.47278e-06	1.15554e-05	0.302419
cg14289511	FLJ45256	1.15677e-08	4.06022e-07	0.302334
cg21321735	KIF1A	3.82925e-06	1.59584e-05	0.301491
cg00930873	ALDH1A2	1.59609e-05	4.58362e-05	0.301481
cg01805282	EYA4	9.67028e-08	1.27283e-06	0.300964
cg13346411	CCKBR	1.31364e-05	3.95967e-05	0.300599
cg23694248	PTPRR	3.70404e-05	8.74508e-05	0.299953
cg06911084	DLX5	8.75547e-07	5.59882e-06	0.299921
cg19751300	ST8SIA5	1.44852e-05	4.24472e-05	0.299902
cg13460409	DSCR6	0.000937199	0.00109651	0.29987
cg02250594	ONECUT2	2.76213e-06	1.25366e-05	0.29984
cg04878152	AGTR1	5.7782e-05	0.000124002	0.299709
cg03522063	EMX2	1.76456e-06	9.16807e-06	0.299111
cg14958635	NEUROG1	3.48592e-08	6.79746e-07	0.298602
cg17412258	DLK1	1.44852e-05	4.24472e-05	0.298037
cg19764436	GNAZ	0.000318638	0.000466866	0.297909
cg26705553	MMP25	0.00020055	0.00032389	0.297602
cg05839235	NPR3	6.08279e-07	4.25117e-06	0.297285
cg08315770	KCNK17	6.3038e-05	0.000132403	0.296394
cg14473924	PDZRN3	4.84582e-05	0.000107801	0.296392
cg00830029	NRIP2	0.00131177	0.00143385	0.296301
cg20011352	GPR124	8.87599e-05	0.000171387	0.296159
cg01722994	GRIN2A	1.27713e-07	1.53985e-06	0.295862
cg20645065	ALPL	0.00710133	0.0057052	0.295408
cg05158615	NPY	1.59609e-05	4.58362e-05	0.295274
cg13168820	PTPRT	0.000134358	0.000235796	0.295113
cg02994974	SPON1	9.75457e-06	3.16369e-05	0.294961
cg13843613	FAM5B	1.11035e-06	6.44772e-06	0.294823
cg00638514	OTOP3	3.68568e-07	3.00075e-06	0.294164
cg19674669	GLB1L3	1.67745e-07	1.82724e-06	0.293964
cg26884581	PYGM	0.000273639	0.000415186	0.293928
cg00775197	TCTE1	5.84929e-06	2.17384e-05	0.293911
cg08209133	SLC10A4	2.81481e-05	7.07951e-05	0.293772
cg21176048	PEX5L	4.05204e-08	7.52955e-07	0.293035
cg00512279	SLC18A2	2.56677e-08	5.8756e-07	0.292963
cg18573383	KCNC2	2.84908e-07	2.45905e-06	0.291843
cg01839464	DCC	0.00107356	0.00121728	0.291747
cg25574024	IGF2AS	2.50041e-07	2.23127e-06	0.291677
cg00121640	ASTN2	5.29316e-05	0.000115476	0.291036
cg25156443	SFRP5	8.8199e-06	2.92052e-05	0.291019
cg26385222	TMEM176A	0.000370278	0.000523587	0.290974
cg27223047	FBN2	3.08658e-05	7.61749e-05	0.290878
cg19721889	HAND1	6.48948e-06	2.30856e-05	0.29075
cg22533573	WT1	1.91864e-07	1.96783e-06	0.290492
cg20804555	GSC	9.65443e-05	0.000183944	0.290315
cg19896198	TNFRSF8	3.68568e-07	3.00075e-06	0.2902
cg11377136	PKDREJ	5.7782e-05	0.000124002	0.290019
cg17560332	BOLL	0.000616664	0.000782965	0.289496
cg14991487	HOXD9	1.24851e-06	6.9682e-06	0.289072
cg05382123	CSMD2	1.44852e-05	4.24472e-05	0.289034
cg01352108	KCNK4	6.87532e-07	4.70105e-06	0.288853
cg04549333	ALX4	7.76273e-07	5.13016e-06	0.288847
cg22836229	EFCAB1	0.000875061	0.00103609	0.28856
cg22777952	FOXB1	0.00017114	0.000286652	0.288421
cg10539507	NKX6-1	3.38235e-05	8.20639e-05	0.288394
cg10694152	SLC15A1	0.000370278	0.000523587	0.28777
cg06139836	EBF3	9.67028e-08	1.27283e-06	0.287272
cg18938204	EMILIN3	2.56677e-08	5.8756e-07	0.287085
cg12302621	SLC28A1	1.40248e-06	7.69161e-06	0.286941
cg19629292	FEZF2	2.84908e-07	2.45905e-06	0.286818
cg16042149	NEFH	2.21176e-06	1.06833e-05	0.28675
cg17977409	SH3GL2	0.00835694	0.00653447	0.286536
cg07175883	HOXD13	1.57389e-06	8.3984e-06	0.286526
cg10646402	PTPRO	0.00635911	0.00520419	0.286145
cg03285457	LBX1	1.27713e-07	1.53985e-06	0.285802
cg06677140	MSX1	1.15677e-08	4.06022e-07	0.28575
cg06397837	HOXA13	2.76213e-06	1.25366e-05	0.285589
cg20308679	FRZB	3.38235e-05	8.20639e-05	0.285301
cg16509658	GABRB2	1.11035e-06	6.44772e-06	0.285185
cg13791131	IGF2AS	4.74562e-07	3.56934e-06	0.285164
cg15343119	GALR1	2.81481e-05	7.07951e-05	0.28367
cg03717979	MSX1	2.76213e-06	1.25366e-05	0.283112
cg22879515	BTG4	8.15552e-05	0.000162851	0.283049
cg01857260	C19orf41	1.27713e-07	1.53985e-06	0.282984
cg15461516	CHST1	1.11035e-06	6.44772e-06	0.28272
cg22886089	SCG3	5.26799e-06	2.03939e-05	0.282627
cg26043257	CD38	0.000497032	0.000661375	0.282335
cg09137696	MT1A	0.00264539	0.00256812	0.28203
cg14826456	ADRB1	1.93372e-05	5.30257e-05	0.281342
cg12448933	RAB37	9.80597e-09	3.87208e-07	0.281283
cg07558455	KANK4	8.75547e-07	5.59882e-06	0.28109
cg23092823	PODN	1.1121e-07	1.41656e-06	0.280644
cg22325703	GPR83	2.19671e-08	5.42135e-07	0.280192
cg09260089	NKX6-2	1.91864e-07	1.96783e-06	0.279723
cg21820677	GABRA2	6.87532e-07	4.70105e-06	0.279613
cg13344740	DLX5	0.00100329	0.00115839	0.279493
cg03289872	ZNF667	0.00426977	0.00375502	0.278948
cg01555431	AKAP12	2.50041e-07	2.23127e-06	0.278694
cg09949775	COMP	5.37577e-07	3.89492e-06	0.278258
cg19064258	HS3ST2	3.70404e-05	8.74508e-05	0.278133
cg00902195	SYT10	6.87301e-05	0.000142278	0.277169
cg06539804	CPXM1	1.75744e-05	4.93921e-05	0.277152
cg17191178	SHOX2	2.56525e-05	6.59896e-05	0.277025
cg11452221	GEFT	9.75457e-06	3.16369e-05	0.2755
cg26365668	MRPS18C	4.4335e-05	0.000100181	0.275291
cg23182299	LHX5	3.08257e-06	1.36002e-05	0.275152
cg04330449	NEUROG1	4.15457e-09	2.7342e-07	0.275068
cg12128839	HOXA5	2.33623e-05	6.15005e-05	0.274854
cg08572611	ACTL6B	3.82925e-06	1.59584e-05	0.274821
cg02545192	TERT	1.24851e-06	6.9682e-06	0.274183
cg04048259	EDN3	9.86487e-07	5.99283e-06	0.274163
cg05774801	SFRP2	1.44852e-05	4.24472e-05	0.274132
cg14662379	KIF1A	2.12621e-05	5.73089e-05	0.274014
cg25465406	GUCY2D	0.000616664	0.000782965	0.273963
cg23967169	FAM19A4	1.31364e-05	3.95967e-05	0.272145
cg15774153	FGF19	0.000661994	0.000829847	0.271525
cg01593190	ADAMTS2	8.29486e-09	3.7433e-07	0.271429
cg20449692	CLDN11	0.000370278	0.000523587	0.271382
cg03365437	ALDH1A2	1.59609e-05	4.58362e-05	0.271314
cg15377518	ZEB2	8.8199e-06	2.92052e-05	0.271306
cg17525406	AJAP1	0.000343576	0.000495138	0.271133
cg12322132	IGF2AS	6.30305e-08	1.00561e-06	0.271069
cg24068372	WDR86	0.000295359	0.000439692	0.270146
cg14882700	OTOP1	4.74057e-06	1.87191e-05	0.269893
cg08900043	HOXC10	0.0899419	0.0476397	0.269363
cg25691167	FERD3L	0.000875061	0.00103609	0.269214
cg22429822	RAB3B	0.000429424	0.000584712	0.269126
cg16632715	HOXD11	0.000273639	0.000415186	0.269121
cg25145670	HOXB4	4.84582e-05	0.000107801	0.269095
cg12995941	INSRR	4.74057e-06	1.87191e-05	0.26902
cg11504897	NRN1	0.000710321	0.000873783	0.268789
cg07384961	CLDN6	0.0207517	0.0139953	0.268708
cg15261665	LTF	0.000234509	0.000367098	0.267953
cg08535373	SLC32A1	4.74057e-06	1.87191e-05	0.267654
cg21669679	DCC	0.000145725	0.000252656	0.267629
cg20291049	POU3F3	7.19397e-06	2.48638e-05	0.26742
cg13801381	CCND2	4.05369e-05	9.40194e-05	0.266867
cg09628601	NPAS1	1.27713e-07	1.53985e-06	0.266415
cg15425280	GRIA2	3.79172e-11	2.99447e-08	0.266336
cg17029168	NKX2-2	1.11035e-06	6.44772e-06	0.26627
cg01920232	RFX4	7.28041e-08	1.1057e-06	0.265785
cg19502744	SRD5A2	0.000114023	0.000208687	0.26572
cg18399321	MGAT3	1.97646e-06	9.97376e-06	0.265629
cg11932564	TNFRSF13C	2.12621e-05	5.73089e-05	0.265472
cg12238343	RXFP3	9.86487e-07	5.99283e-06	0.265322
cg05203877	SLC8A3	5.29316e-05	0.000115476	0.264851
cg25854162	IGFBP2	9.67028e-08	1.27283e-06	0.26461
cg11965370	NTM	0.00149595	0.00160409	0.264565
cg11177693	ZNF513	4.74562e-07	3.56934e-06	0.264321
cg13384396	ADCY5	0.000123809	0.000221967	0.26426
cg20498685	TWIST1	0.00020055	0.00032389	0.264178
cg01830294	WNT2	3.43718e-06	1.46333e-05	0.264062
cg20624391	BVES	3.70404e-05	8.74508e-05	0.263893
cg00282347	CHD5	7.19397e-06	2.48638e-05	0.263883
cg25917510	HOXC8	0.00537347	0.00452414	0.263724
cg00318573	CHRNA4	4.70247e-08	8.25273e-07	0.26348
cg13663218	TRHDE	0.000216923	0.000343657	0.263449
cg18919097	C3orf57	0.000253386	0.000389696	0.263298
cg15201877	PTGER3	0.00017114	0.000286652	0.263292
cg08341874	VMO1	0.00452501	0.00394435	0.262861
cg25563456	WT1	3.48592e-08	6.79746e-07	0.262155
cg15640375	LPPR3	0.00010495	0.00019525	0.262063
cg10741760	HTR6	1.93372e-05	5.30257e-05	0.261289
cg17328659	STUB1	0.00193546	0.00200329	0.260486
cg18994063	TIMD4	2.21176e-06	1.06833e-05	0.260269
cg11611600	ADAMTSL3	3.08658e-05	7.61749e-05	0.260152
cg12680609	ZFP41	0.00122755	0.00135967	0.25992
cg13603171	MOXD1	0.000937199	0.00109651	0.259897
cg17194182	EPO	7.76273e-07	5.13016e-06	0.259651
cg08422599	KCNIP1	1.24851e-06	6.9682e-06	0.259527
cg22396755	RAP1GAP	0.002062	0.00210802	0.259524
cg15988792	ACSS1	0.0390467	0.0239045	0.259212
cg19118812	ELMO1	0.0746153	0.040808	0.259133
cg11241627	FERD3L	5.29316e-05	0.000115476	0.258536
cg11846236	COL7A1	6.87301e-05	0.000142278	0.258459
cg02774439	HAND2	7.19397e-06	2.48638e-05	0.258289
cg12513481	SKAP1	0.000185312	0.000306169	0.258136
cg26312150	TWIST1	2.19167e-07	2.1108e-06	0.258134
cg12864235	CDH9	8.87599e-05	0.000171387	0.25795
cg01566404	ETNK2	4.84582e-05	0.000107801	0.257431
cg14950072	LAMA1	1.75744e-05	4.93921e-05	0.257359
cg02055963	CDX2	0.000253386	0.000389696	0.257319
cg21073927	GATA4	2.47278e-06	1.15554e-05	0.257189
cg27634151	GPR83	1.27713e-07	1.53985e-06	0.257082
cg27416067	IL12RB2	0.000273639	0.000415186	0.256896
cg06722633	GRIK3	3.38235e-05	8.20639e-05	0.256889
cg11591325	F2R	0.00010495	0.00019525	0.25688
cg20268522	NCAM1	0.000875061	0.00103609	0.25688
cg13755070	FLI1	6.87532e-07	4.70105e-06	0.256863
cg22498251	TWIST1	0.000398855	0.000552617	0.256779
cg04490714	SLC6A2	0.000253386	0.000389696	0.256583
cg25842633	SCUBE1	8.87599e-05	0.000171387	0.256476
cg10281478	DYNC1I1	1.11035e-06	6.44772e-06	0.256373
cg15147516	MIXL1	8.8199e-06	2.92052e-05	0.256324
cg02361557	NTNG1	0.000295359	0.000439692	0.25607
cg19435264	SLC6A7	2.33623e-05	6.15005e-05	0.256027
cg21546671	HOXB4	9.75457e-06	3.16369e-05	0.255887
cg05650171	PFDN2	0.000574164	0.000740916	0.255731
cg04072323	SPHKAP	0.00017114	0.000286652	0.255258
cg15452573	SNCA	0.000145725	0.000252656	0.255016
cg24625128	JAM3	9.67028e-08	1.27283e-06	0.254401
cg21529533	HLA-G	7.48909e-05	0.000152042	0.254202
cg01169726	DLX5	6.87301e-05	0.000142278	0.254044
cg12622986	BARHL1	1.93372e-05	5.30257e-05	0.253973
cg25604883	AK5	1.91864e-07	1.96783e-06	0.25397
cg04706338	VTN	7.48909e-05	0.000152042	0.253921
cg04564030	CDH7	4.84582e-05	0.000107801	0.25381
cg17398595	SH3GL2	0.00479364	0.0041442	0.253804
cg18952647	BNC1	0.000398855	0.000552617	0.253804
cg10364513	RXRG	0.00233749	0.00232935	0.253523
cg27652350	ALDH1A3	0.00601423	0.0049605	0.253028
cg11832722	DSC3	0.0114604	0.00857482	0.252948
cg24989962	PTGDR	0.00017114	0.000286652	0.252945
cg19620294	TNFRSF11B	4.4335e-05	0.000100181	0.252802
cg10486998	GALR1	9.65443e-05	0.000183944	0.252596
cg01200060	SCRT2	0.000343576	0.000495138	0.25204
cg21608192	XYLT1	2.81481e-05	7.07951e-05	0.251902
cg05307923	ADARB2	3.08658e-05	7.61749e-05	0.251611
cg08896945	CALCB	8.8199e-06	2.92052e-05	0.251516
cg20855565	TRIM58	1.11035e-06	6.44772e-06	0.25151
cg04391111	TP73	0.000343576	0.000495138	0.251437
cg13170032	HLX	4.70247e-08	8.25273e-07	0.251204
cg26304237	DNAJC6	0.00010495	0.00019525	0.251193
cg12556134	TGIF2	0.0155172	0.0109318	0.250775
cg10238818	CYYR1	0.00017114	0.000286652	0.250766
cg24693368	KCNJ3	2.76213e-06	1.25366e-05	0.25067
cg08432727	SOX11	0.000370278	0.000523587	0.250352
cg21376883	ACTN2	4.4335e-05	0.000100181	0.250299
cg26033710	TACR1	3.70404e-05	8.74508e-05	0.250299
cg00405677	HAND1	2.50041e-07	2.23127e-06	0.250154
cg08383315	RIC3	0.00264539	0.00256812	0.250104
cg10149836	RAB11FIP4	1.27713e-07	1.53985e-06	0.249811
cg26299767	REM1	4.18463e-07	3.30477e-06	0.249613
cg22975913	WT1	4.05204e-08	7.52955e-07	0.249465
cg01431114	PDE10A	0.000534337	0.000699233	0.249406
cg19904463	FABP5	0.00248719	0.00244764	0.249223
cg04369341	TOX2	0.00114823	0.00128808	0.249204
cg24723331	ST8SIA1	9.86487e-07	5.99283e-06	0.249021
cg25202471	TFAP2A	0.0120646	0.00895482	0.248663
cg23300372	CARTPT	0.000123809	0.000221967	0.248537
cg27243140	OTOP3	5.84929e-06	2.17384e-05	0.247704
cg12087643	GFRA1	1.87665e-08	5.11058e-07	0.247377
cg08623947	HCK	4.18463e-07	3.30477e-06	0.247358
cg14681055	PITX3	0.0126963	0.00933157	0.247099
cg05345286	MDFI	0.000216923	0.000343657	0.247083
cg00117172	RUNX3	0.00248719	0.00244764	0.246581
cg05270634	RND2	0.00122755	0.00135967	0.246572
cg01661993	TTYH1	8.87599e-05	0.000171387	0.246525
cg25434223	ELAVL3	2.56525e-05	6.59896e-05	0.246512
cg13912117	ADCY8	0.000343576	0.000495138	0.245896
cg18765542	DGKZ	0.00233749	0.00232935	0.245807
cg07935568	MLNR	0.00537347	0.00452414	0.245648
cg04598121	PENK	2.33623e-05	6.15005e-05	0.245381
cg22189019	FGF22	0.000534337	0.000699233	0.2453
cg15883716	ANKRD45	0.000574164	0.000740916	0.24491
cg08997253	GRIN3A	0.000216923	0.000343657	0.244898
cg03663215	ADCY2	1.19045e-05	3.64397e-05	0.244805
cg26747293	EGFLAM	0.000462106	0.000623835	0.24456
cg00015770	QRFPR	1.87665e-08	5.11058e-07	0.244372
cg10942056	DISP1	0.000295359	0.000439692	0.24422
cg06630567	AMBP	0.00881654	0.00686326	0.244175
cg02115041	NPBWR1	1.46466e-07	1.65243e-06	0.244102
cg05840031	PAX6	2.19167e-07	2.1108e-06	0.243913
cg12880658	CDO1	2.19167e-07	2.1108e-06	0.243718
cg22175764	ANKRD60	0.000123809	0.000221967	0.243654
cg09068492	CALCA	0.000398855	0.000552617	0.243649
cg20674577	PHACTR3	1.07801e-05	3.41221e-05	0.24354
cg01114088	CYTL1	0.083538	0.0448188	0.243406
cg13756879	IGF2	2.56525e-05	6.59896e-05	0.24332
cg13975369	TSGA14	0.000761818	0.000925597	0.243284
cg01400401	C19orf30	0.000761818	0.000925597	0.243164
cg22815110	FOXD3	3.08658e-05	7.61749e-05	0.24288
cg04856858	AGAP1	1.75744e-05	4.93921e-05	0.242744
cg18640030	CRH	9.86487e-07	5.99283e-06	0.242553
cg21269934	NAT8L	0.00010495	0.00019525	0.242522
cg13301003	WT1	4.4335e-05	0.000100181	0.242276
cg15839448	SFRP1	0.00107356	0.00121728	0.242149
cg08668790	ZNF154	0.00264539	0.00256812	0.241962
cg11612345	SMOC2	0.000318638	0.000466866	0.241608
cg00234616	TLX2	0.00020055	0.00032389	0.241468
cg02867079	HHIPL1	0.00114823	0.00128808	0.241452
cg08996748	DISP2	0.000185312	0.000306169	0.241372
cg07601320	SLC38A4	0.000661994	0.000829847	0.24135
cg15926585	COMT	0.000318638	0.000466866	0.241121
cg02387679	IQGAP2	7.48909e-05	0.000152042	0.240776
cg18108623	SLFN11	0.000761818	0.000925597	0.240673
cg08260891	CTSA	0.00140114	0.00151685	0.240637
cg20890210	KCNB2	0.000216923	0.000343657	0.240576
cg16211684	PCDH21	8.8199e-06	2.92052e-05	0.240448
cg19135761	WDR8	8.87599e-05	0.000171387	0.240176
cg13398291	SFRP1	5.84929e-06	2.17384e-05	0.240059
cg22740783	CGREF1	6.3038e-05	0.000132403	0.239985
cg06557358	TMEM132E	0.000234509	0.000367098	0.239981
cg21553524	TMEM178	5.29316e-05	0.000115476	0.239941
cg13488201	ADAM12	2.56525e-05	6.59896e-05	0.23967
cg17199658	SNX31	0.000134358	0.000235796	0.23954
cg20339650	IGF2	4.4335e-05	0.000100181	0.23948
cg18678121	SEC61A2	0.00568591	0.0047342	0.239393
cg06912252	C9orf125	0.00426977	0.00375502	0.239204
cg07850604	INSM2	0.00100329	0.00115839	0.239152
cg21513553	COL6A2	0.00568591	0.0047342	0.239082
cg15918284	GABRA2	9.86487e-07	5.99283e-06	0.23905
cg04981492	SYDE1	0.000875061	0.00103609	0.238796
cg04101379	DZIP1	8.15552e-05	0.000162851	0.23871
cg06572160	KCNC3	0.000429424	0.000584712	0.238602
cg19526600	DIO1	0.000114023	0.000208687	0.238537
cg00399483	DCC	7.96867e-06	2.70674e-05	0.23853
cg13929328	FOXI2	2.50041e-07	2.23127e-06	0.238398
cg01806928	SYT9	0.00219589	0.00221338	0.238307
cg06493994	SCGN	2.19167e-07	2.1108e-06	0.238277
cg16722536	TBX1	0.000253386	0.000389696	0.238247
cg14611174	SIX6	0.000343576	0.000495138	0.238009
cg04922810	CRHR2	1.11035e-06	6.44772e-06	0.237849
cg21053529	GJD2	3.08658e-05	7.61749e-05	0.237538
cg06971096	PTPRN	0.000134358	0.000235796	0.236425
cg00027083	EPB41L3	0.000816667	0.00098092	0.236358
cg14225485	FAM84A	0.0133563	0.0097038	0.236173
cg24879335	TF	0.000370278	0.000523587	0.235942
cg23239039	D4S234E	5.84929e-06	2.17384e-05	0.235584
cg19067730	CTSA	0.002062	0.00210802	0.235523
cg27546237	COL4A1	5.26799e-06	2.03939e-05	0.235521
cg10143146	COL11A2	1.15677e-08	4.06022e-07	0.235468
cg14436761	RAMP2	2.41204e-09	2.00514e-07	0.235214
cg00240432	TWIST1	3.24244e-07	2.75342e-06	0.235131
cg13991233	GAS7	0.000343576	0.000495138	0.23512
cg25946389	MGMT	1.3668e-09	1.54203e-07	0.235058
cg10895543	CDKN2A	0.0313821	0.0199146	0.234888
cg20023231	HS3ST2	0.000123809	0.000221967	0.234803
cg06533629	KLF14	0.000816667	0.00098092	0.23428
cg07028533	CNTNAP2	2.33623e-05	6.15005e-05	0.234151
cg20052718	TWIST1	0.000429424	0.000584712	0.234021
cg15736165	BNC1	2.81481e-05	7.07951e-05	0.233708
cg21948783	WNT1	0.000318638	0.000466866	0.233406
cg19135706	RAB3C	7.19397e-06	2.48638e-05	0.233226
cg21264055	PRR3	0.00193546	0.00200329	0.233046
cg18752880	C1QTNF3	5.84929e-06	2.17384e-05	0.232868
cg13877465	IGF2BP1	0.00020055	0.00032389	0.232814
cg10742801	PRAP1	1.93372e-05	5.30257e-05	0.232761
cg04039397	CD96	0.00107356	0.00121728	0.232629
cg18396533	DYDC1	0.0035788	0.00325239	0.232617
cg04609859	HOXB4	0.0035788	0.00325239	0.232314
cg20740029	SLC5A8	0.00248719	0.00244764	0.232244
cg11594137	S1PR3	0.00264539	0.00256812	0.231906
cg04378886	RCN3	0.0390467	0.0239045	0.231714
cg05064352	PHF21B	0.000157966	0.000270318	0.231701
cg06295856	CALCA	2.33623e-05	6.15005e-05	0.231595
cg06321883	COL19A1	0.000234509	0.000367098	0.231573
cg12571423	CCNA1	8.15552e-05	0.000162851	0.231543
cg07703401	HBQ1	4.84582e-05	0.000107801	0.231506
cg22680204	CRMP1	3.82925e-06	1.59584e-05	0.231334
cg03199651	MSX1	7.28041e-08	1.1057e-06	0.23118
cg13102585	RUNDC3A	7.28041e-08	1.1057e-06	0.23117
cg17188046	T	0.00281249	0.00270211	0.230857
cg11459714	KLK10	2.33623e-05	6.15005e-05	0.230414
cg18592174	CHAT	1.57389e-06	8.3984e-06	0.23037
cg13878010	ADCY5	0.0300115	0.0191525	0.230312
cg26557658	FAM43B	0.00193546	0.00200329	0.23027
cg17133183	CRABP1	4.74057e-06	1.87191e-05	0.230206
cg12006284	WT1	1.75744e-05	4.93921e-05	0.230024
cg05485060	CTNNAL1	4.4335e-05	0.000100181	0.229947
cg05621401	RET	1.59609e-05	4.58362e-05	0.229767
cg16158681	MT3	2.84908e-07	2.45905e-06	0.229629
cg21870884	GPR25	1.46466e-07	1.65243e-06	0.22959
cg20008332	SOX11	0.000497032	0.000661375	0.229584
cg25332298	ELAVL3	2.56525e-05	6.59896e-05	0.229579
cg07747970	LHX1	0.000185312	0.000306169	0.229467
cg20289949	HAAO	0.00601423	0.0049605	0.229398
cg18691434	GPC2	0.0035788	0.00325239	0.229337
cg10457247	PRDM14	0.000216923	0.000343657	0.229199
cg06043042	NEUROG3	4.18463e-07	3.30477e-06	0.22908
cg06497752	COL9A3	5.7782e-05	0.000124002	0.228987
cg12973651	CNFN	0.00248719	0.00244764	0.228531
cg17256157	NMBR	2.47278e-06	1.15554e-05	0.228525
cg19439399	ELOVL4	2.12621e-05	5.73089e-05	0.228512
cg00116234	ADAMTSL1	0.00281249	0.00270211	0.228489
cg16564824	SNAP25	0.000875061	0.00103609	0.228481
cg13262687	POU4F2	7.19397e-06	2.48638e-05	0.228308
cg25174591	DNAH9	0.000574164	0.000740916	0.227606
cg25668368	KCNH7	2.21176e-06	1.06833e-05	0.227291
cg23097006	VSX1	0.00149595	0.00160409	0.227013
cg07686479	LMX1A	5.37577e-07	3.89492e-06	0.226929
cg15310873	C20orf85	0.000134358	0.000235796	0.22645
cg22418909	SFRP1	6.87301e-05	0.000142278	0.22633
cg23219570	FGF23	2.56525e-05	6.59896e-05	0.226213
cg04107037	ATOH1	0.000134358	0.000235796	0.226169
cg18110483	THBS4	0.000462106	0.000623835	0.226167
cg26926521	ADRA2A	0.00020055	0.00032389	0.22595
cg13589108	FAM5B	2.21176e-06	1.06833e-05	0.225722
cg07634191	SCARA5	0.0228017	0.0151962	0.225716
cg08876932	PHOX2A	0.000234509	0.000367098	0.225467
cg18089852	PDE8B	9.65443e-05	0.000183944	0.225432
cg00498604	TLL1	0.00835694	0.00653447	0.225115
cg17095797	FOXL1	2.81481e-05	7.07951e-05	0.224772
cg22776578	CPLX2	6.87301e-05	0.000142278	0.224548
cg02836529	NEUROD1	1.57389e-06	8.3984e-06	0.224532
cg10187559	TTYH1	7.76273e-07	5.13016e-06	0.224449
cg23152772	FIBCD1	2.81481e-05	7.07951e-05	0.224075
cg21790626	ZNF154	0.00426977	0.00375502	0.224027
cg18145505	GREM1	0.000710321	0.000873783	0.224009
cg23196831	COL14A1	1.31364e-05	3.95967e-05	0.223912
cg24775607	SSTR5	1.44852e-05	4.24472e-05	0.22365
cg05472874	SULT4A1	0.00107356	0.00121728	0.223585
cg20587394	HOXC13	5.7782e-05	0.000124002	0.223331
cg12317456	MMP2	0.000157966	0.000270318	0.22315
cg16334795	BACE2	7.48909e-05	0.000152042	0.222958
cg05937453	SFRP5	3.38235e-05	8.20639e-05	0.222857
cg02250787	HTR2A	0.0217562	0.0145855	0.222617
cg21184174	NGF	8.87599e-05	0.000171387	0.222593
cg22461835	ADRA1A	9.75457e-06	3.16369e-05	0.222569
cg15584813	SLC38A4	0.00010495	0.00019525	0.222271
cg05896682	GALR1	7.76273e-07	5.13016e-06	0.222039
cg23357981	GRP	3.08658e-05	7.61749e-05	0.221977
cg14008883	SLC18A3	9.80597e-09	3.87208e-07	0.2218
cg08961832	NLRP6	4.74562e-07	3.56934e-06	0.221462
cg16014085	ZNF48	0.00710133	0.0057052	0.221441
cg13823701	TNXB	0.00402736	0.00357166	0.22138
cg12584718	MEPCE	0.00402736	0.00357166	0.221365
cg22131691	PDE1C	0.000661994	0.000829847	0.221256
cg01939681	GABRB2	3.43718e-06	1.46333e-05	0.221245
cg24169822	HOXA4	5.8972e-09	3.10484e-07	0.221244
cg25764191	INA	6.48948e-06	2.30856e-05	0.221194
cg08205865	ADCY10	3.38235e-05	8.20639e-05	0.22094
cg07376535	ADCYAP1	2.21176e-06	1.06833e-05	0.220829
cg10730712	COL23A1	4.74057e-06	1.87191e-05	0.220807
cg08369065	GATA4	0.00248719	0.00244764	0.220315
cg21087137	GLIPR1L1	0.00507625	0.00432462	0.220242
cg02388150	SFRP1	6.48948e-06	2.30856e-05	0.220209
cg06263495	ASCL2	0.00107356	0.00121728	0.220178
cg21306775	FLJ44881	0.00017114	0.000286652	0.220164
cg26363196	ST6GALNAC3	0.00929802	0.00719904	0.220127
cg21163415	EDN3	2.21176e-06	1.06833e-05	0.219929
cg05822100	CDH6	3.38235e-05	8.20639e-05	0.219812
cg27114120	PROKR2	0.00281249	0.00270211	0.219776
cg09099744	CDKN2A	0.0286915	0.0184368	0.219762
cg16954341	SCGN	0.000318638	0.000466866	0.219635
cg02248486	HOXA5	7.19397e-06	2.48638e-05	0.219378
cg13801416	AKR1B1	0.0775008	0.0421235	0.21924
cg18123948	GATA4	0.00017114	0.000286652	0.219238
cg24690731	SOX7	0.00193546	0.00200329	0.219164
cg21243096	POU3F1	9.67028e-08	1.27283e-06	0.219021
cg24594997	RBP1	3.82925e-06	1.59584e-05	0.21883
cg04925864	FAM65A	0.000937199	0.00109651	0.218725
cg11308840	TMEM215	0.0147657	0.0105244	0.218411
cg25484904	CWH43	6.08279e-07	4.25117e-06	0.218394
cg26590537	KCNA1	7.48909e-05	0.000152042	0.218343
cg18581445	SHD	0.000134358	0.000235796	0.218069
cg03775422	VSTM2A	9.75457e-06	3.16369e-05	0.218062
cg06537230	DLX5	2.56677e-08	5.8756e-07	0.217903
cg25938646	SLITRK1	2.81481e-05	7.07951e-05	0.217765
cg16004226	B4GALNT4	0.00159649	0.0017015	0.217635
cg05209917	CNTN6	0.000761818	0.000925597	0.216939
cg02927346	RASL10B	0.000157966	0.000270318	0.216739
cg22181664	CLCA1	1.97646e-06	9.97376e-06	0.216658
cg08958015	CCDC65	0.0171191	0.0118698	0.216411
cg17527798	LTF	0.00107356	0.00121728	0.216352
cg14458834	HOXB4	1.93372e-05	5.30257e-05	0.216278
cg14221171	TAC1	1.07801e-05	3.41221e-05	0.215674
cg11812218	GHSR	0.000497032	0.000661375	0.215637
cg21096399	MCAM	8.15552e-05	0.000162851	0.215603
cg04456238	WT1	4.26241e-06	1.73515e-05	0.21553
cg03889226	OLIG3	0.000398855	0.000552617	0.215503
cg20050826	KRT72	4.4335e-05	0.000100181	0.215303
cg14859460	GRM6	0.000157966	0.000270318	0.215282
cg23326689	STMN2	0.000216923	0.000343657	0.21527
cg23006204	DPM2	3.08658e-05	7.61749e-05	0.215017
cg09150117	DLX5	0.00122755	0.00135967	0.21498
cg10141715	SLC5A8	6.87301e-05	0.000142278	0.214851
cg20019546	SFRP4	3.38235e-05	8.20639e-05	0.214795
cg16428251	SOX14	0.00020055	0.00032389	0.214727
cg09911755	OSBPL7	3.68568e-07	3.00075e-06	0.214591
cg25808906	DGKG	4.95578e-09	2.79555e-07	0.214476
cg19568591	FRZB	5.84929e-06	2.17384e-05	0.214442
cg20950011	CIDEA	1.97646e-06	9.97376e-06	0.214433
cg12109455	DPYSL4	8.87599e-05	0.000171387	0.214367
cg20051033	CPNE9	4.74562e-07	3.56934e-06	0.214252
cg26677448	PAX2	0.000318638	0.000466866	0.214138
cg12289045	SYT3	0.0114604	0.00857482	0.214039
cg03329165	CD200	0.0502336	0.0292778	0.213958
cg22655224	MT3	2.21176e-06	1.06833e-05	0.213939
cg14144305	ALX4	5.84929e-06	2.17384e-05	0.21391
cg11747771	GLDC	4.74057e-06	1.87191e-05	0.213699
cg10303487	DPYS	0.000710321	0.000873783	0.21357
cg14449051	SLC6A15	7.48909e-05	0.000152042	0.213341
cg13264741	GRIN2B	2.84908e-07	2.45905e-06	0.21322
cg18453621	LMX1B	0.000123809	0.000221967	0.21311
cg21250978	PRKAR2B	0.000761818	0.000925597	0.213093
cg00779924	FLJ45983	2.81481e-05	7.07951e-05	0.212922
cg14659404	ASTN1	1.44852e-05	4.24472e-05	0.212766
cg17950095	HOXA11	1.19045e-05	3.64397e-05	0.212647
cg16092786	WT1	3.48592e-08	6.79746e-07	0.212557
cg22679003	CDH2	0.000937199	0.00109651	0.212518
cg11119596	CD96	0.000398855	0.000552617	0.212456
cg21835643	RBPJL	0.00672124	0.00544693	0.212436
cg13097816	GPR35	0.000574164	0.000740916	0.212378
cg18267381	ZNF385D	0.000123809	0.000221967	0.212334
cg19882093	GGTLC1	0.0274207	0.0177721	0.212261
cg05056120	EBF1	7.96867e-06	2.70674e-05	0.211966
cg21048669	CLEC3A	0.00122755	0.00135967	0.211881
cg02022375	KRTAP1-1	0.000216923	0.000343657	0.211684
cg19885761	CPLX2	0.00181592	0.001902	0.211683
cg20557202	SLC5A5	0.000134358	0.000235796	0.211485
cg12582959	CCDC106	0.00929802	0.00719904	0.210845
cg09126273	PTPRO	0.0567422	0.0324369	0.21073
cg24101578	CDH22	3.82925e-06	1.59584e-05	0.210689
cg27560922	ARHGDIG	9.80597e-09	3.87208e-07	0.210677
cg06933965	CMKLR1	2.33623e-05	6.15005e-05	0.210494
cg15447479	SMO	0.000497032	0.000661375	0.210464
cg06621358	CELSR3	1.40248e-06	7.69161e-06	0.210422
cg21716693	CPNE5	0.000616664	0.000782965	0.210236
cg18722841	PHOX2A	0.000534337	0.000699233	0.209899
cg00806490	CDH13	0.000661994	0.000829847	0.209671
cg01717150	KCNK9	0.000710321	0.000873783	0.209456
cg10247252	GALR2	0.00452501	0.00394435	0.209272
cg18270343	JRK	7.48909e-05	0.000152042	0.209151
cg21958798	GUCY1A2	1.93372e-05	5.30257e-05	0.209128
cg23129478	ST8SIA5	0.00159649	0.0017015	0.20899
cg25784308	FAM123C	2.47278e-06	1.15554e-05	0.208981
cg07054095	ZNF549	0.002062	0.00210802	0.208841
cg02416716	ZNF215	0.0140458	0.0101117	0.208808
cg00658626	CCDC63	0.000370278	0.000523587	0.208797
cg08747377	CDH13	0.00791841	0.00625036	0.20861
cg08896053	SNTG1	0.000253386	0.000389696	0.208428
cg17641252	PLEK2	0.00835694	0.00653447	0.208279
cg23995753	LY75	0.0567422	0.0324369	0.208175
cg07664856	CNTN6	0.000185312	0.000306169	0.208118
cg16154416	RASGRF1	0.000253386	0.000389696	0.207925
cg17142183	IL1R2	0.00264539	0.00256812	0.207879
cg20881054	VASH1	0.0103301	0.00787843	0.207873
cg27319898	ZNF804B	0.00107356	0.00121728	0.207833
cg23337754	CRABP1	8.75547e-07	5.59882e-06	0.207616
cg21942082	ACOT12	4.74562e-07	3.56934e-06	0.207587
cg02501779	CBLN4	1.31364e-05	3.95967e-05	0.207538
cg06834875	HHIPL1	0.000661994	0.000829847	0.207414
cg23771929	FREQ	0.0171191	0.0118698	0.207017
cg18769818	ARAP1	0.0103301	0.00787843	0.206366
cg06490988	GATA2	0.000816667	0.00098092	0.20616
cg26270746	GSX1	7.76273e-07	5.13016e-06	0.205931
cg03996793	C19orf30	6.3038e-05	0.000132403	0.205483
cg13523557	ADCY1	0.0114604	0.00857482	0.205412
cg11670211	NOX4	0.0140458	0.0101117	0.205263
cg18501026	DOCK3	5.29316e-05	0.000115476	0.205162
cg21602160	AOC3	0.000398855	0.000552617	0.205123
cg26832142	PDE4B	0.000574164	0.000740916	0.205061
cg06055013	ATRNL1	0.00233749	0.00232935	0.205023
cg22598028	ZNF660	0.0482051	0.0283889	0.20493
cg26055770	PDZRN3	2.81481e-05	7.07951e-05	0.204755
cg03755123	UTF1	1.24851e-06	6.9682e-06	0.204431
cg05681757	FGD4	9.65443e-05	0.000183944	0.204406
cg12024292	ASTN2	0.000398855	0.000552617	0.204345
cg16519321	MYOD1	3.68568e-07	3.00075e-06	0.204296
cg03743584	PRAP1	7.96867e-06	2.70674e-05	0.204244
cg08612037	BTBD11	0.00337162	0.00308898	0.204237
cg04272086	DCC	0.000616664	0.000782965	0.204012
cg12699371	GALR1	0.000216923	0.000343657	0.204006
cg25511429	NRN1	0.000216923	0.000343657	0.203811
cg15501381	NGB	0.000123809	0.000221967	0.203572
cg05932408	PTGIS	6.3038e-05	0.000132403	0.203549
cg05222924	WT1	0.000273639	0.000415186	0.203475
cg26750002	RASIP1	0.00537347	0.00452414	0.203386
cg12601757	ST6GALNAC3	0.00181592	0.001902	0.203298
cg03734874	TMEM179	4.70247e-08	8.25273e-07	0.203167
cg06015218	GRM1	5.7782e-05	0.000124002	0.203159
cg10414058	HDAC3	0.000398855	0.000552617	0.203129
cg11319389	TOX2	0.000937199	0.00109651	0.203023
cg26900154	OTOF	0.000145725	0.000252656	0.202875
cg25509184	CFTR	0.0274207	0.0177721	0.202848
cg02131995	HAMP	4.4335e-05	0.000100181	0.202823
cg09829319	GCM2	0.00507625	0.00432462	0.202679
cg24250393	PRKCB	0.000295359	0.000439692	0.202453
cg22123464	SLC8A2	6.48948e-06	2.30856e-05	0.202324
cg10088985	CXCL5	0.00507625	0.00432462	0.202247
cg21461100	NOVA2	0.0358125	0.0222522	0.202231
cg13759328	CDH13	0.00379721	0.00340194	0.202194
cg03556497	SLC32A1	6.48948e-06	2.30856e-05	0.202172
cg20178764	GFRA3	0.0250212	0.0164463	0.202144
cg05436658	PRKCB	9.75457e-06	3.16369e-05	0.201789
cg26545162	ZACN	1.57389e-06	8.3984e-06	0.201752
cg04096767	WT1	1.19045e-05	3.64397e-05	0.201617
cg00516481	PDE9A	0.000534337	0.000699233	0.20153
cg05890484	BHMT	0.000123809	0.000221967	0.201476
cg07102705	HTR4	0.00672124	0.00544693	0.201339
cg25584626	PRR16	4.4335e-05	0.000100181	0.201257
cg17580045	CCND2	0.0261978	0.0170987	0.201255
cg20406482	KCNH4	0.0443498	0.0264938	0.20117
cg06637893	C16orf48	0.000462106	0.000623835	0.201163
cg12614105	NPY	0.000295359	0.000439692	0.200967
cg04599297	GAD2	0.000343576	0.000495138	0.200919
cg27351358	BDNF	7.76273e-07	5.13016e-06	0.200797
cg04317399	HOXA4	2.47278e-06	1.15554e-05	0.200745
cg20088964	HMGA2	0.0691022	0.0382832	0.200636
cg13807496	ALX4	4.98866e-10	9.70324e-08	0.20062
cg22719623	OPRM1	1.07801e-05	3.41221e-05	0.200605
cg25993718	CBLN4	5.7782e-05	0.000124002	0.200471
cg22892904	CBX2	0.000343576	0.000495138	0.200227
cg18397523	EVX1	2.33623e-05	6.15005e-05	0.200168
cg08319991	UCHL1	5.84929e-06	2.17384e-05	0.20007
cg04915566	RUNX1	0.00710133	0.0057052	-0.206135
* Ordered by decreasing β-value difference
