# Supplementary material for: Genome-scale analysis of DNA methylation in lung adenocarcinoma and integration with mRNA expression
Source: HighWire-hosted journal article supplement (doi:10.1101/gr.132662.111), 2012-05-21
Supplement: Selamat_Suppl_Table9.xlsx [file Selamat_Suppl_Table9.xlsx]

## Sheet: Sheet1
Supplemental Table 9. Genes differentially expressed in Cluster 1 vs. Cluster2
Gene*	Q-value	Fold change (log2)	Function	Cancer references
EFHD1	0.04	-1.249	Undetermined	NA
PHLDA1	0.05	1.016	Involved in apoptosis	(Neef et al., 2002; Sakthianandeswaren et al., 2011)
DCBLD2	0.068	1.123	Undetermined	(Kim et al., 2008; Koshikawa et al., 2002)
GBP1	0.008	1.147	Binds GMP, GDP and GTP, immune response	(Duan et al., 2006; Guenzi et al., 2001)
CXCL9	0.05	1.267	Cytokine affecting growth, movement of immune response cells	(Amatschek et al., 2011; Andersson et al., 2011)
CXCL10	0.041	1.369	Chemotactic for immune cells, and involved in adhesion and migration	(Andersson et al., 2011; Shimizu et al., 2011)
CXCL14	0.062	2.069	Cytokine involved in immune and inflammatory processes	(Augsten et al., 2009; Tessema et al., 2010)
*Ordered by increasing fold change
