# Supplementary material for: Genome-scale analysis of DNA methylation in lung adenocarcinoma and integration with mRNA expression
Source: HighWire-hosted journal article supplement (doi:10.1101/gr.132662.111), 2012-05-21
Supplement: Selamat_Suppl_Table10.xlsx [file Selamat_Suppl_Table10.xlsx]

## Sheet: Sheet1
Supplemental Table 10. MethyLight primers and probes
Gene	Forward Primer Sequence	Reverse Primer Sequence	Probe Oligo Sequence
ABCA3	TCGATAGTTGTCGCGGGTC	CCGAAACCACGAACGCAC	6FAM-CCGACCGCTAACGACGCTCGAA-BHQ1
ACVRL1	TAGAGGTGAGTCGAGGTTCGC	CTAAACCTCCCGCGACCA	6FAM-AACGAAAATCAAACCGCCCGCC-BHQ1
DOCK2	ATAGGGTTAAGATTTGCGTTTGA	CTCCCACGCGACGAAC	6FAM-CTCCTAAAAACGCCGAATTTAACGCGAA-BHQ1
EFEMP1	TTAGGATCGGAATTAGGGATCG	AAAACCGCCGCGTTAACTT	6FAM-CCGCCCGCCCGAAACTAATACCT-BHQ1
FAM83A	TTCGGTTGGTTACGGACGTT	AAACCTAAATATACTAAACCTCCACCGA	6FAM-CGCCTTCCTAACTAAACACCCGCCAAT-BHQ1
HOXA5	CGACGCGGGCGTTATC	ACGCGAATAAAACATTACAACCC	6FAM-CTCCCGACTCCGAATTCCCGCT-BHQ-1
JAM2	CGAGGTCGTCGCGGG	CTTACTCCCAACGTCCGCTC	6FAM-CTAAATTTCCCGCTCGCCTAAACGCA-BHQ1
MAL	GTTCGGTGTAGGATTTTAGCGTC	ATCTACAATAAAAAATAAAACCGACCG	6FAM-CGACCGCCGACCCCTTCCG-BHQ-1
NDRG2	AGGTGTGTTGGCGTCGAAAG	AAACAAACGTCGAAACGCAAC	6FAM-AAAATCGAAACTCCTACGCCCTCGACG-BHQ1
SOCS2	TCGGGCGGAGTTGCG	AAAACTTCGCAACCTACTCTCGAC	6FAM-CCGCCCTCGCGACAATATCAATCC-BHQ1
SPON1	TCGTTAAGTCGAGGCGGG	CCTACCCGAAATAATCCCGAC	6FAM-AAACTCGAAACTAACGTCCGCGACTCG-BHQ1
