# Supplementary material for: Genome-scale analysis of DNA methylation in lung adenocarcinoma and integration with mRNA expression
Source: HighWire-hosted journal article supplement (doi:10.1101/gr.132662.111), 2012-05-21
Supplement: SELAMAT_SupplFigLegends.docx [file SELAMAT_SupplFigLegends.docx]

**Supplemental Figure Legends**

**Supplemental Figure 1. Quality control and batch effects analysis of the DNA methylation data show no confounding batch effects**. A) The top two principal components of all probes after subtracting for probes on the X and Y chromosomes, probes that contain SNPs and repeat sequences of ≥10bp. Tumor and NTL samples are colored by bisulfite-treatment plate: Plate 31 (purple); Plate 32 (green). There is clear separation of tumor from NTL samples, but no strong delineation between plates, supporting the absence of a strong batch effect. B and C) Density plots of H2228 (a lung adenocarcinoma cell line from which DNA was run on both bisulfite treatment plates) show good overlap and good correlation with an R2=0.97.

**Supplemental Figure 2. Diagram of analysis strategy.** Overview of analyses and samples used in this study.

**Supplemental Figure 3. CpG island-associated Illumina Infinium HumanMethylation27 probes for *CDH13*.** (A) Six of the nine *CDH13* probes are located in or near a CpG island. Two probes were included in our analysis of the top 5000 most variable probes and were statistically significantly differentially methylated between tumors and NTL (Q<0.05, median beta-value difference ≥0.2, highlighted in red). (B) X-axes: DNA methylation beta-values; Y-axes: log2-transformed gene expression values. Spearman correlation coefficients are shown at the bottom of each scatterplot. Tumors (red); NTL (blue). (C) Y-axes: DNA methylation β-values.

**Supplemental Figure 4. Intronic Illumina Infinium HumanMethylation27K probes for *CDH13*.** (A) Three of the nine *CDH13* probes are located in the intronic region of the gene. One probe was included in our analysis of the top 5000 most variable probes and was statistically significantly differentially methylated between tumors and NTL (Q<0.05, median β-value difference ≥0.2, highlighted in red). (B) X-axes: DNA methylation beta-values; Y-axes: log2-transformed gene expression values. Spearman correlation coefficients are shown at the bottom of each scatterplot. Tumors (red); NTL (blue). (C) Y-axes: DNA methylation β-values.

**Supplemental Figure 5. Verification of DNA methylation differences between lung adenocarcinoma and NTL in independent samples and with an alternate method.** (A) Two dimensional-hierarchical clustering was performed using the 5000 most variable Infinium DNA methylation probes across all samples (n=57). Probes are in rows; samples are in columns. (B) Volcano plot of the differential DNA methylation analysis. X-axis: median β-value difference (median Tumor-median NTL); Y-axis: *Q-*values for each probe (-1*log10 scale). The vertical dotted lines mark 20% change in β-values; the horizontal dotted line marks the significance cut-off. (C) MethyLight verification of select loci using 26 independent tumor/NTL pairs. PMR = Percent Methylated Reference, a measure of DNA methylation in comparison to a fully methylated control, with range 0-100, where 0 represents no detectable methylation and 100 represents high DNA methylation. *p*-values were calculated using Wilcoxon signed-rank tests.

**Supplemental Figure 6. NextBio illustration of biosets found to be most significantly correlated with genes identified in this study to have functional changes in DNA methylation.** (A-E) Bioset 1 is our list of 221 genes for which DNA methylation changes were significantly inversely correlated with gene expression.Venn diagram and statistics for each panel illustrates significantly overlapping genes between Bioset 1 and each publicly available bioset. (A) Bioset 2 contains data from GSE19804 (Lu et al. 2010) comparing gene expression profiles of non-smoking female stage 1 lung cancer patients in Taiwan vs. adjacent non-tumor lung. (B) Bioset 2 contains data from GSE10799 (Wrage et al. 2009) comparing gene expression profiles of primary lung adenocarcinomas without bone metastasis to non-tumor lung. (C) Bioset 2 contains data from GSE19188 (Hou et al. 2010) comparing gene expression profiles of lung adenocarcinoma tumors and non-tumor lung. (D) Bioset 2 contains data from GSE25062 (Hinoue et al. 2011) comparing DNA methylation profiles of colorectal adenocarcinoma and adjacent normal tissue. (E) Bioset 2 contains data from GSE17648 (Kim YH and Kim YS, unpublished publicly available data), comparing DNA methylation profiles from colorectal adenocarcinoma and normal adjacent mucosa.

**Supplemental Figure 7. Hierarchical clustering of tumors identifies two distinct DNA-methylation based clusters. (**A) Two-dimensional hierarchical clustering using the 766 genes previously identified to be significantly differently methylated between tumors and NTL. Rows are probes; columns are samples. Fisher p-values for different sample parameters are shown on the left, parameters are indicated at right (the listed characteristic is marked as a black tick mark, except as indicated in the key beside the heatmap). The two main clusters are marked in color at the top of the heatmap. (B) Kaplan-Meier survival plot between the two clusters does not show a statistically significant difference. (C) Silhouette plots of hierarchical clustering analyses using top 5000 most variable probes as well as the 766 differentially methylated genes.

**Supplemental Figure 8. Hypermethylation of Cluster 1 occurs in the absence and presence of *KRAS* mutation.** (A) Correlation matrix of median β-values of all probes in Cluster 1 tumors with mutant *KRAS* vs. wild type *KRAS*. (B) Correlation matrix of median β-values of all probes in Cluster 2 tumors with mutant *KRAS* vs. wild type *KRAS*. (C) Correlation matrix of median β-values of all probes in *KRAS* mutant tumors from Cluster 1 vs. Cluster 2. (D) Correlation matrix of median β-values of all probes in *KRAS* wild type tumors from Cluster 1 vs. Cluster 2. Note that the pronounced hypermethylation in Cluster 1 tumors is seen both in the presence and absence of *KRAS* mutation, indicating that *KRAS* mutation alone cannot explain the DNA hypermethylation in Cluster 1.

**Supplemental Figure 9. No statistically significant differential expression of DNA methyltransferases or *TET* genes is seen in Cluster 1.** A BH multiple comparisons correction was applied.

**Supplemental References**

Hinoue T, Weisenberger DJ, Lange CP, Shen H, Byun HM, Van Den Berg D, Malik S, Pan F, Noushmehr H, van Dijk CM et al. 2011. Genome-scale analysis of aberrant DNA methylation in colorectal cancer. *Genome Res*.

Hou J, Aerts J, den Hamer B, van Ijcken W, den Bakker M, Riegman P, van der Leest C, van der Spek P, Foekens JA, Hoogsteden HC et al. 2010. Gene expression-based classification of non-small cell lung carcinomas and survival prediction. *PLoS One* **5**(4): e10312.

Lu TP, Tsai MH, Lee JM, Hsu CP, Chen PC, Lin CW, Shih JY, Yang PC, Hsiao CK, Lai LC et al. 2010. Identification of a novel biomarker, SEMA5A, for non-small cell lung carcinoma in nonsmoking women. *Cancer Epidemiol Biomarkers Prev* **19**(10): 2590-2597.

Wrage M, Ruosaari S, Eijk PP, Kaifi JT, Hollmen J, Yekebas EF, Izbicki JR, Brakenhoff RH, Streichert T, Riethdorf S et al. 2009. Genomic profiles associated with early micrometastasis in lung cancer: relevance of 4q deletion. *Clin Cancer Res* **15**(5): 1566-1574.
