# Supplementary material for: Genome-scale analysis of DNA methylation in lung adenocarcinoma and integration with mRNA expression
Source: HighWire-hosted journal article supplement (doi:10.1101/gr.132662.111), 2012-05-21
Supplement: SuppREVTable8.xlsx [file SuppREVTable8.xlsx]

## Sheet: Downregulated
Supplemental Table 8. Sheet 1: Genes hypermethylated and downregulated in Cluster 1 vs. 2
Gene*	t-test p-value	BH p-value	Fold change (log2)
CCDC3	2.66872e-06	2.60058e-05	-1.06202
CLDN11	1.75665e-07	2.2914e-06	-1.06368
CTSF	4.33287e-08	7.08733e-07	-1.28585
GFRA1	8.66471e-12	4.40937e-10	-1.30989
GGTLC1	0.000516525	0.00268828	-1.01434
GRP	0.00264704	0.0107287	-1.14907
HLX	2.50207e-07	3.09715e-06	-1.01166
JAM3	1.22808e-07	1.75768e-06	-1.2534
KANK4	1.8183e-08	3.33112e-07	-1.15476
MT1A	4.86588e-06	4.64286e-05	-1.64171
MT1G	9.00228e-05	0.000549739	-1.91215
RBP1	6.96848e-09	1.38764e-07	-1.28807
TMEM178	4.56368e-10	1.39344e-08	-1.32492
* In alphabetical order

## Sheet: Upregulated
Supplemental Table 8. Sheet 2: Genes hypermethylated and upregulated in Cluster 1 vs. 2
Gene*	t-test p-value	BH p-value	Fold change (log2)
CBX2	1.2428e-05	9.8138e-05	1.13208
DBC1	0.0108969	0.0373259	1.03401
KCNK12	0.00123001	0.00563343	1.26103
* In alphabetical order
